# Supplementary material for: Diagnosis and Management of Glioblastoma: A Comprehensive Perspective
Source: J Pers Med. 2021 Apr 1;11(4):258. doi: 10.3390/jpm11040258 (PMC8065751; doi:10.3390/jpm11040258)
Supplement: Supplementary file 1 [file jpm-11-00258-s001.tgz › supplementray_table_s1.xlsx]

## Sheet: Sheet1
PMID	YearPub	Journal	Authors	Title	Abstract	articlepe	language	pmcID	doi	meshTerms	tsneComp1	tsneComp2	tsneComp3	Cluster_name	Number_of_Articles_by_cluster
29106517	2017	Carcinogenesis	Qiang, Zhou;Jun-Jie, Li;Hai, Wang;Hong, Li;Bing-Xi, Lei;Lei, Chen;Wei, Xiang;Ya-Wei, Liu;Huang, Annie;Song-Tao, Qi;Yun-Tao, Lu	TPD52L2 impacts proliferation, invasiveness and apoptosis of glioblastoma cells via modulation of wnt/β-catenin/snail signaling.	Intratumoral heterogeneity greatly hinders efficiency of target therapy in glioblastoma (GBM). To decipher the underlying mechanisms of heterogeneity, patient-derived adult GBM cells were separately isolated from margins of T1 gadolinium enhancing tumor lesions (PNCs) and T1 gadolinium enhancing core lesions (ECs). Single clone culture was conducted in ECs and U87MG cell line to screen clones wit…	Journal Article	eng		10.1093/carcin/bgx125	Animals;Apoptosis;Biomarkers, Tumor;Brain Neoplasms;Cell Movement;Cell Proliferation;Glioblastoma;Heterografts;Humans;Kaplan-Meier Estimate;Mice;Mice, Inbred NOD;Mice, SCID;Neoplasm Invasiveness;Neoplasm Proteins;Snail Family Transcription Factors;Tumor Cells, Cultured;Wnt Signaling Pathway	22.5058	16.9949	-1.48303	Proteomics	135
32098270	2020	International journal of molecular sciences	Merolle, Matilde;Mongiardi, Maria Patrizia;Piras, Maurizia;Levi, Andrea;Falchetti, Maria Laura	Glioblastoma Cells Do Not Affect Axitinib-Dependent Senescence of HUVECs in a Transwell Coculture Model.	Axitinib is an orally available inhibitor of tyrosine kinases, with high specificity for vascular endothelial growth factor receptors (VEGFRs) 1, 2, and 3. It is approved for the treatment of advanced renal cell carcinoma and is in phase II clinical trials for recurrent glioblastoma (GBM). GBM is a brain tumor peculiar in its ability to induce neoangiogenesis. Since both GBM tumor cells and endot…	Journal Article	eng		10.3390/ijms21041490		13.468	16.2783	-3.68323	Proteomics	135
32002519	2020	Neuro-oncology advances	Spina, Raffaella;Voss, Dillon M;Yang, Xiaohua;Sohn, Jason W;Vinkler, Robert;Schraner, Julianna;Sloan, Anthony;Welford, Scott M;Avril, Norbert;Ames, Heather M;Woodworth, Graeme F;Bar, Eli E	MCT4 regulates de novo pyrimidine biosynthesis in GBM in a lactate-independent manner.	Necrotic foci with surrounding hypoxic cellular pseudopalisades and microvascular hyperplasia are histological features found in glioblastoma (GBM). We have previously shown that monocarboxylate transporter 4 (MCT4) is highly expressed in necrotic/hypoxic regions in GBM and that increased levels of MCT4 are associated with worse clinical outcomes.</AbstractText>: Necrotic foci with surrounding hy…	Journal Article	eng	PMC6979491	10.1093/noajnl/vdz062		13.0335	17.3149	-4.86666	Proteomics	135
31973233	2020	Cells	D'Souza, Rochelle C J;Offenhäuser, Carolin;Straube, Jasmin;Baumgartner, Ulrich;Kordowski, Anja;Li, Yuchen;Stringer, Brett W;Alexander, Hamish;Lwin, Zarnie;Inglis, Po-Ling;Jeffree, Rosalind L;Johns, Terrance G;Boyd, Andrew W;Day, Bryan W	Q-Cell Glioblastoma Resource: Proteomics Analysis Reveals Unique Cell-States are Maintained in 3D Culture.	Glioblastoma (GBM) is a treatment-refractory central nervous system (CNS) tumour, and better therapies to treat this aggressive disease are urgently needed. Primary GBM models that represent the true disease state are essential to better understand disease biology and for accurate preclinical therapy assessment. We have previously presented a comprehensive transcriptome characterisation of a pane…	Journal Article	eng		10.3390/cells9020267		10.6369	17.3003	-1.60129	Proteomics	135
31888172	2020	Cancers	Pang, Lin;Hu, Jing;Li, Feng;Yuan, Huating;Yan, Min;Liao, Gaoming;Xu, Liwen;Pang, Bo;Ping, Yanyan;Xiao, Yun;Li, Xia	Discovering Rare Genes Contributing to Cancer Stemness and Invasive Potential by GBM Single-Cell Transcriptional Analysis.	Single-cell RNA sequencing presents the sophisticated delineation of cell transcriptomes in many cancer types and highlights the tumor heterogeneity at higher resolution, which provides a new chance to explore the molecular mechanism in a minority of cells. In this study, we utilized publicly available single-cell RNA-seq data to discover and comprehensively dissect rare genes existing in few gli…	Journal Article	eng	PMC6966673	10.3390/cancers11122025		16.2687	12.7095	1.29521	Proteomics	135
31862900	2019	Scientific reports	Asad, Antonela Sofía;Nicola Candia, Alejandro Javier;Gonzalez, Nazareno;Zuccato, Camila Florencia;Abt, Araceli;Orrillo, Santiago Jordi;Lastra, Yael;De Simone, Emilio;Boutillon, Florence;Goffin, Vincent;Seilicovich, Adriana;Pisera, Daniel Alberto;Ferraris, María Jimena;Candolfi, Marianela	Prolactin and its receptor as therapeutic targets in glioblastoma multiforme.	Although prolactin (PRL) and its receptor (PRLR) have been detected in glioblastoma multiforme (GBM), their role in its pathogenesis remains unclear. Our aim was to explore their contribution in GBM pathogenesis. We detected PRL and PRLR in all GBM cell lines tested. PRLR activation or overexpression using plasmid transfection increased proliferation, viability, clonogenicity, chemoresistance and…	Journal Article	eng	PMC6925187	10.1038/s41598-019-55860-x		16.5043	14.9724	-1.52038	Proteomics	135
31811117	2019	Experimental &amp; molecular medicine	Han, Suji;Shin, Hyemi;Lee, Jin-Ku;Liu, Zhaoqi;Rabadan, Raul;Lee, Jeongwu;Shin, Jihye;Lee, Cheolju;Yang, Heekyoung;Kim, Donggeon;Kim, Sung Heon;Kim, Jooyeon;Oh, Jeong-Woo;Kong, Doo-Sik;Lee, Jung-Il;Seol, Ho Jun;Choi, Jung Won;Kang, Hyun Ju;Nam, Do-Hyun	Secretome analysis of patient-derived GBM tumor spheres identifies midkine as a potent therapeutic target.	Glioblastoma (GBM) is the most lethal primary brain tumor with few treatment options. The survival of glioma-initiating cells (GICs) is one of the major factors contributing to treatment failure. GICs frequently produce and respond to their own growth factors that support cell proliferation and survival. In this study, we aimed to identify critical autocrine factors mediating GIC survival and to …	Journal Article	eng	PMC6897967	10.1038/s12276-019-0351-y		12.8034	16.9034	-4.59301	Proteomics	135
31772693	2019	Disease markers	Yuan, Feng;Yi, Li;Hai, Long;Wang, Yingshuai;Yang, Yihan;Li, Tao;Tong, Luqing;Ma, Haiwen;Liu, Peidong;Ming, Haolang;Ren, Bingcheng;Yu, Shengping;Lin, Yu;Yang, Xuejun	Identification of Key Pathways and Genes in the Orai2 Mediated Classical and Mesenchymal Subtype of Glioblastoma by Bioinformatic Analyses.	Via The Cancer Genome Atlas (TCGA), French, Sun, and Gene Expression Omnibus (GEO) (GDS3885) datasets, we collected 1231 cases with RNA-seq data and analyzed the functional annotation of Orai2 by gene ontology (GO) and Kyoto Encyclopedia of Genes and Genomes (KEGG) pathway analysis. Univariate and multivariate survival analyses were applied to 823 patients with survival data.</AbstractText>: Via …	Journal Article	eng	PMC6855003	10.1155/2019/7049294		10.924	14.7853	7.02893	Proteomics	135
31772153	2019	Cell death &amp; disease	Ozyerli-Goknar, Ezgi;Sur-Erdem, Ilknur;Seker, Fidan;Cingöz, Ahmet;Kayabolen, Alisan;Kahya-Yesil, Zeynep;Uyulur, Fırat;Gezen, Melike;Tolay, Nazife;Erman, Batu;Gönen, Mehmet;Dunford, James;Oppermann, Udo;Bagci-Onder, Tugba	The fungal metabolite chaetocin is a sensitizer for pro-apoptotic therapies in glioblastoma.	Glioblastoma Multiforme (GBM) is the most common and aggressive primary brain tumor. Despite recent developments in surgery, chemo- and radio-therapy, a currently poor prognosis of GBM patients highlights an urgent need for novel treatment strategies. TRAIL (TNF Related Apoptosis Inducing Ligand) is a potent anti-cancer agent that can induce apoptosis selectively in cancer cells. GBM cells freque…	Journal Article	eng	PMC6879621	10.1038/s41419-019-2107-y		12.4521	16.9465	-6.10918	Proteomics	135
31767628	2019	Cancer research	Randall, Elizabeth C;Lopez, Begoña G C;Peng, Sen;Regan, Michael S;Abdelmoula, Walid M;Basu, Sankha S;Santagata, Sandro;Yoon, Haejin;Haigis, Marcia C;Agar, Jeffrey N;Tran, Nhan L;Elmquist, William F;White, Forest M;Sarkaria, Jann N;Agar, Nathalie Y R	Localized Metabolomic Gradients in Patient-Derived Xenograft Models of Glioblastoma.	Glioblastoma (GBM) is increasingly recognized as a disease involving dysfunctional cellular metabolism. GBMs are known to be complex heterogeneous systems containing multiple distinct cell populations and are supported by an aberrant network of blood vessels. A better understanding of GBM metabolism, its variation with respect to the tumor microenvironment, and resulting regional changes in chemi…	Journal Article	eng		10.1158/0008-5472.CAN-19-0638		14.6779	20.444	-2.97125	Proteomics	135
31632919	2019	Frontiers in oncology	Guo, Jianshuang;Xue, Qingqing;Liu, Kaihui;Ge, Weizhi;Liu, Wenjie;Wang, Jiyan;Zhang, Mengyi;Li, Qiu-Ying;Cai, Dongpo;Shan, Changliang;Zhang, Chunze;Liu, Xinqi;Li, Jing	Dimethylaminomicheliolide (DMAMCL) Suppresses the Proliferation of Glioblastoma Cells via Targeting Pyruvate Kinase 2 (PKM2) and Rewiring Aerobic Glycolysis.	Glioblastoma (GBM) is the most prevalent malignant tumor in the central nervous system. Aerobic glycolysis, featured with elevated glucose consumption and lactate production, confers selective advantages on GBM by utilizing nutrients to support rapid cell proliferation and tumor growth. Pyruvate kinase 2 (PKM2), the last rate-limiting enzyme of glycolysis, is known to regulate aerobic glycolysis,…	Journal Article	eng	PMC6783512	10.3389/fonc.2019.00993		14.6389	19.8037	-5.21575	Proteomics	135
31628288	2019	Journal of neurosurgery	Ibrahim, Ahmed N;Yamashita, Daisuke;Anderson, Joshua C;Abdelrashid, Moaaz;Alwakeal, Amr;Estevez-Ordonez, Dagoberto;Komarova, Svetlana;Markert, James M;Goidts, Violaine;Willey, Christopher D;Nakano, Ichiro	Intratumoral spatial heterogeneity of BTK kinomic activity dictates distinct therapeutic response within a single glioblastoma tumor.	OBJECTIVE: Despite significant recent efforts applied toward the development of efficacious therapies for glioblastoma (GBM) through exploration of GBM's genome and transcriptome, curative therapeutic strategies remain highly elusive. As such, novel and effective therapeutics are urgently required. In this study, the authors sought to explore the kinomic landscape of GBM from a previously underut…	Journal Article	eng		10.3171/2019.7.JNS191376		14.785	16.7099	-2.02576	Proteomics	135
31548728	2019	Nature biotechnology	Ye, Lupeng;Park, Jonathan J;Dong, Matthew B;Yang, Quanjun;Chow, Ryan D;Peng, Lei;Du, Yaying;Guo, Jianjian;Dai, Xiaoyun;Wang, Guangchuan;Errami, Youssef;Chen, Sidi	In vivo CRISPR screening in CD8 T cells with AAV-Sleeping Beauty hybrid vectors identifies membrane targets for improving immunotherapy for glioblastoma.	Targeting membrane proteins could improve the efficacy of T cell-based immunotherapies. To facilitate the identification of T cell targets, we developed a hybrid genetic screening system where the Sleeping Beauty (SB) transposon and single guide RNA cassette are nested in an adeno-associated virus (AAV). SB-mediated genomic integration of the single guide RNA cassette enables efficient gene editi…	Journal Article	eng	PMC6834896	10.1038/s41587-019-0246-4	Animals;Antigens, CD;CD8-Positive T-Lymphocytes;CRISPR-Cas Systems;Cell Line, Tumor;Dependovirus;Female;Gene Editing;Glioblastoma;Humans;Immunotherapy, Adoptive;Male;Membrane Proteins;Mice;N-Acetylglucosaminyltransferases;Neoplasm Proteins;Protein Disulfide-Isomerases;RNA, Guide;Receptors, Cell Surface;Transposases;Xenograft Model Antitumor Assays	14.662	18.5819	-1.73857	Proteomics	135
31531023	2019	Journal of oncology	Menezes, Aline;Dos Reis, Gustavo Henrique;Oliveira-Nunes, Maria Cecília;Mariath, Fernanda;Cabanel, Mariana;Pontes, Bruno;Gonçalves Castro, Newton;de Brito, José Marques;Carneiro, Katia	Live Cell Imaging Supports a Key Role for Histone Deacetylase as a Molecular Target during Glioblastoma Malignancy Downgrade through Tumor Competence Modulation.	Glioblastoma (GBM) is the most aggressive tumor of the central nervous system, and the identification of the mechanisms underlying the biological basis of GBM aggressiveness is essential to develop new therapies. Due to the low prognosis of GBM treatment, different clinical studies are in course to test the use of histone deacetylase inhibitors (iHDACs) in anticancer cocktails. Here, we seek to i…	Journal Article	eng	PMC6720048	10.1155/2019/9043675		14.1048	16.8018	-2.46155	Proteomics	135
31506386	2019	Clinical cancer research : an official journal of the American Association for Cancer Research	Chauvin, Cynthia;Joalland, Noémie;Perroteau, Jeanne;Jarry, Ulrich;Lafrance, Laura;Willem, Catherine;Retière, Christelle;Oliver, Lisa;Gratas, Catherine;Gautreau-Rolland, Laetitia;Saulquin, Xavier;Vallette, François M;Vié, Henri;Scotet, Emmanuel;Pecqueur, Claire	NKG2D Controls Natural Reactivity of Vγ9Vδ2 T Lymphocytes against Mesenchymal Glioblastoma Cells.	EXPERIMENTAL DESIGN: Through functional and transcriptomic analyses, we extensively characterized the immunoreactivity of human Vγ9Vδ2 T lymphocytes against various primary GBM cultures directly derived from patient tumors.CONCLUSIONS: By identifying pathways implicated in the selective natural recognition of mesenchymal GBM cell subtypes, accounting for 30% of primary diagnosed and 60% of recurr…	Journal Article	eng		10.1158/1078-0432.CCR-19-0375		12.4343	15.9157	5.38984	Proteomics	135
31492588	2019	Current research in translational medicine	Wu, Geting;Yan, Yuanliang;Zhou, Yangying;Wang, Xiang;Wei, Jie;Chen, Xi;Lin, Wei;Ou, Chunlin;Zhou, Jianhua;Xu, Zhijie	Expression and clinical significance of CPS1 in glioblastoma multiforme.	Carbamoyl phosphate synthetase-1 (CPS1), the first rate-limiting mitochondrial enzyme in the urea cycle, regulates proliferation and differentiation during tumor progression. However, the detailed function of CPS1 in glioblastoma Multiforme (GBM) is still unclear. Here, we highlight mechanisms for CPS1 upregulation and the effects of upregulated CPS1 on GBM tumorigenesis. The transcriptome data f…	Journal Article	eng		10.1016/j.retram.2019.08.003		17.2177	14.4126	-1.16008	Proteomics	135
31471491	2019	Proceedings of the National Academy of Sciences of the United States of America	Shen, Yaoqing;Grisdale, Cameron J;Islam, Sumaiya A;Bose, Pinaki;Lever, Jake;Zhao, Eric Y;Grinshtein, Natalie;Ma, Yussanne;Mungall, Andrew J;Moore, Richard A;Lun, Xueqing;Senger, Donna L;Robbins, Stephen M;Wang, Alice Yijun;MacIsaac, Julia L;Kobor, Michael S;Luchman, H Artee;Weiss, Samuel;Chan, Jennifer A;Blough, Michael D;Kaplan, David R;Cairncross, J Gregory;Marra, Marco A;Jones, Steven J M	Comprehensive genomic profiling of glioblastoma tumors, BTICs, and xenografts reveals stability and adaptation to growth environments.	Glioblastoma multiforme (GBM) is the most deadly brain tumor, and currently lacks effective treatment options. Brain tumor-initiating cells (BTICs) and orthotopic xenografts are widely used in investigating GBM biology and new therapies for this aggressive disease. However, the genomic characteristics and molecular resemblance of these models to GBM tumors remain undetermined. We used massively p…	Journal Article	eng	PMC6754609	10.1073/pnas.1813495116		14.7186	17.5698	-1.39398	Proteomics	135
31395852	2019	Cell death &amp; disease	Zgheib, Racha;Battaglia-Hsu, Shyue-Fang;Hergalant, Sébastien;Quéré, Maelle;Alberto, Jean-Marc;Chéry, Céline;Rouyer, Pierre;Gauchotte, Guillaume;Guéant, Jean-Louis;Namour, Farès	Folate can promote the methionine-dependent reprogramming of glioblastoma cells towards pluripotency.	Methionine dependency of tumor growth, although not well-understood, is detectable by (11)C-methionine positron emission tomography and may contribute to the aggressivity of glioblastomas (GBM) and meningiomas. Cytosolic folate cycle is required for methionine synthesis. Its dysregulation may influence cell reprogramming towards pluripotency. We evaluated methionine-dependent growth of monolayer …	Journal Article	eng	PMC6687714	10.1038/s41419-019-1836-2		12.5036	20.5695	-5.28016	Proteomics	135
31332251	2019	Scientific reports	Park, Junseong;Shim, Jin-Kyoung;Yoon, Seon-Jin;Kim, Se Hoon;Chang, Jong Hee;Kang, Seok-Gu	Transcriptome profiling-based identification of prognostic subtypes and multi-omics signatures of glioblastoma.	Glioblastoma (GBM) is a lethal tumor, but few biomarkers and molecular subtypes predicting prognosis are available. This study was aimed to identify prognostic subtypes and multi-omics signatures for GBM. Using oncopression and TCGA-GBM datasets, we identified 80 genes most associated with GBM prognosis using correlations between gene expression levels and overall survival of patients. The progno…	Journal Article	eng	PMC6646357	10.1038/s41598-019-47066-y		11.0904	14.5158	7.7013	Proteomics	135
31282108	2019	Journal of cellular and molecular medicine	Gao, Yixing;Zhang, Erlong;Liu, Bao;Zhou, Kai;He, Shu;Feng, Lan;Wu, Gang;Cao, Mianfu;Wu, Haibo;Cui, Youhong;Zhang, Xia;Liu, Xindong;Wang, Yan;Gao, Yuqi;Bian, Xiuwu	Integrated analysis identified core signal pathways and hypoxic characteristics of human glioblastoma.	As a hallmark for glioblastoma (GBM), high heterogeneity causes a variety of phenotypes and therapeutic responses among GBM patients, and it contributes to treatment failure. Moreover, hypoxia is a predominant feature of GBM and contributes greatly to its phenotype. To analyse the landscape of gene expression and hypoxic characteristics of GBM cells and their clinical significance in GBM patients…	Journal Article	eng	PMC6714287	10.1111/jcmm.14507		15.8475	17.2055	-5.53584	Proteomics	135
31101126	2019	Journal of experimental &amp; clinical cancer research : CR	Matteoni, Silvia;Abbruzzese, Claudia;Matarrese, Paola;De Luca, Gabriele;Mileo, Anna M;Miccadei, Stefania;Schenone, Silvia;Musumeci, Francesca;Haas, Tobias L;Sette, Giovanni;Carapella, Carmine M;Amato, Rosario;Perrotti, Nicola;Signore, Michele;Paggi, Marco G	The kinase inhibitor SI113 induces autophagy and synergizes with quinacrine in hindering the growth of human glioblastoma multiforme cells.	BACKGROUND: Glioblastoma multiforme (GBM), due to its location, aggressiveness, heterogeneity and infiltrative growth, is characterized by an exceptionally dismal clinical outcome. The small molecule SI113, recently identified as a SGK1 inhibitor, has proven to be effective in restraining GBM growth in vitro and in vivo, showing also encouraging results when employed in combination with other ant…	Journal Article	eng	PMC6525441	10.1186/s13046-019-1212-1	Apoptosis;Autophagy;Cell Line, Tumor;Cell Proliferation;Cell Survival;Drug Synergism;Glioblastoma;Humans;Neoplasm Proteins;Protein Kinase Inhibitors;Pyrazoles;Pyrimidines;Quinacrine;Signal Transduction	13.2023	16.9849	-6.75414	Proteomics	135
31052505	2019	International journal of molecular sciences	Lupinacci, Fernanda Cristina Sulla;Kuasne, Hellen;Roffé, Martin;Vassalakis, Julia Avian;da Silva, Fernanda Ferreira;Santos, Tiago Góss;Andrade, Victor Piana;Sanematsu, Paulo;Martins, Vilma Regina;Rogatto, Silvia Regina;Hajj, Glaucia Noeli Maroso	Polysome Profiling of a Human Glioblastoma Reveals Intratumoral Heterogeneity.	Glioblastoma (GBM) is one of the most aggressive cancers, with median survival of less than 2 years. Despite of considerable advance in molecular classification of GBMs, no improvements in therapy have been described. The scenario is further complicated by tumor heterogeneity and the relationship among genetic, transcriptional and functional findings. Classically, gene expression has been evaluat…	Journal Article	eng	PMC6539516	10.3390/ijms20092177	Cell Line, Tumor;Central Nervous System Neoplasms;Extracellular Signal-Regulated MAP Kinases;Female;Gene Expression Profiling;Gene Expression Regulation, Neoplastic;Glioblastoma;Humans;Mechanistic Target of Rapamycin Complex 1;Middle Aged;Protein Biosynthesis;RNA, Messenger	13.3058	14.0778	1.79203	Proteomics	135
31044160	2019	Communications biology	Zhang, Jing;Caruso, Francesca P;Sa, Jason K;Justesen, Sune;Nam, Do-Hyun;Sims, Peter;Ceccarelli, Michele;Lasorella, Anna;Iavarone, Antonio	The combination of neoantigen quality and T lymphocyte infiltrates identifies glioblastomas with the longest survival.	Glioblastoma (GBM) is resistant to multimodality therapeutic approaches. A high burden of tumor-specific mutant peptides (neoantigens) correlates with better survival and response to immunotherapies in selected solid tumors but how neoantigens impact clinical outcome in GBM remains unclear. Here, we exploit the similarity between tumor neoantigens and infectious disease-derived immune epitopes an…	Journal Article	eng	PMC6478916	10.1038/s42003-019-0369-7		15.5975	16.9242	-0.787463	Proteomics	135
31025151	2019	Neurochemical research	Seyfried, Thomas N;Shelton, Laura;Arismendi-Morillo, Gabriel;Kalamian, Miriam;Elsakka, Ahmed;Maroon, Joseph;Mukherjee, Purna	Provocative Question: Should Ketogenic Metabolic Therapy Become the Standard of Care for Glioblastoma?	No major advances have been made in improving overall survival for glioblastoma (GBM) in almost 100 years. The current standard of care (SOC) for GBM involves immediate surgical resection followed by radiotherapy with concomitant temozolomide chemotherapy. Corticosteroid (dexamethasone) is often prescribed to GBM patients to reduce tumor edema and inflammation. The SOC disrupts the glutamate-glut…	Journal Article	eng		10.1007/s11064-019-02795-4	Brain Neoplasms;Glioblastoma;Glucose;Glutamine;Humans;Ketone Bodies;Mitochondria;Standard of Care;Temozolomide;Tumor Microenvironment	14.7035	20.1848	-4.87503	Proteomics	135
30987208	2019	Cancers	Nowicki, Michal O;Hayes, Josie L;Chiocca, E Antonio;Lawler, Sean E	Proteomic Analysis Implicates Vimentin in Glioblastoma Cell Migration.	We previously showed lithium chloride (LiCl) and other inhibitors of glycogen synthase kinase-3 (GSK-3) including 6-bromo-indirubin-3-oxime (BIO), can block glioblastoma (GBM) cell migration. To investigate the mechanisms involved we used two-dimensional difference in-gel electrophoresis (2D-DIGE) and mass spectrometry to identify proteins altered after treatment of U251 GBM cells with 20 mM LiCl…	Journal Article	eng	PMC6521049	10.3390/cancers11040466		12.8178	14.6334	-3.09243	Proteomics	135
30952620	2019	EBioMedicine	Tejero, Rut;Huang, Yong;Katsyv, Igor;Kluge, Michael;Lin, Jung-Yi;Tome-Garcia, Jessica;Daviaud, Nicolas;Wang, Yuanshuo;Zhang, Bin;Tsankova, Nadejda M;Friedel, Caroline C;Zou, Hongyan;Friedel, Roland H	Gene signatures of quiescent glioblastoma cells reveal mesenchymal shift and interactions with niche microenvironment.	BACKGROUND: Glioblastoma (GBM), a highly malignant brain tumor, invariably recurs after therapy. Quiescent GBM cells represent a potential source of tumor recurrence, but little is known about their molecular underpinnings.METHODS: Patient-derived GBM cells were engineered by CRISPR/Cas9-assisted knock-in of an inducible histone2B-GFP (iH2B-GFP) reporter to track cell division history. We utilize…	Journal Article	eng	PMC6491796	10.1016/j.ebiom.2019.03.064	Brain Neoplasms;Cell Cycle;Cell Line, Tumor;Cell Self Renewal;Computational Biology;Drug Resistance, Neoplasm;Extracellular Matrix;Fluorescent Antibody Technique;Gene Expression;Gene Expression Profiling;Gene Silencing;Genes, Reporter;Glioblastoma;Humans;Immunohistochemistry;Kaplan-Meier Estimate;Neoplastic Stem Cells;Tumor Microenvironment	15.5452	16.4696	-2.47158	Proteomics	135
30926789	2019	Cell death &amp; disease	Hasan, Tanwir;Caragher, Seamus P;Shireman, Jack M;Park, Cheol H;Atashi, Fatemeh;Baisiwala, Shivani;Lee, Gina;Guo, Donna;Wang, Jennifer Y;Dey, Mahua;Wu, Meijing;Lesniak, Maciej S;Horbinski, Craig M;James, C David;Ahmed, Atique U	Interleukin-8/CXCR2 signaling regulates therapy-induced plasticity and enhances tumorigenicity in glioblastoma.	Emerging evidence reveals enrichment of glioma-initiating cells (GICs) following therapeutic intervention. One factor known to contribute to this enrichment is cellular plasticity-the ability of glioma cells to attain multiple phenotypes. To elucidate the molecular mechanisms governing therapy-induced cellular plasticity, we performed genome-wide chromatin immunoprecipitation sequencing (ChIP-Seq…	Journal Article	eng	PMC6441047	10.1038/s41419-019-1387-6		13.7996	15.7583	-1.55055	Proteomics	135
30818875	2019	Cancers	Wojtas, Bartosz;Gielniewski, Bartlomiej;Wojnicki, Kamil;Maleszewska, Marta;Mondal, Shamba S;Nauman, Pawel;Grajkowska, Wieslawa;Glass, Rainer;Schüller, Ulrich;Herold-Mende, Christel;Kaminska, Bozena	Gliosarcoma Is Driven by Alterations in PI3K/Akt, RAS/MAPK Pathways and Characterized by Collagen Gene Expression Signature.	Gliosarcoma is a very rare brain tumor reported to be a variant of glioblastoma (GBM), IDH-wildtype. While differences in molecular and histological features between gliosarcoma and GBM were reported, detailed information on the genetic background of this tumor is lacking. We intend to fill in this knowledge gap by the complex analysis of somatic mutations, indels, copy number variations, translo…	Journal Article	eng	PMC6468745	10.3390/cancers11030284		14.9588	15.3254	4.48312	Proteomics	135
30777055	2019	BMC cancer	Ostrovskaya, Anna;Hick, Caroline;Hutchinson, Dana S;Stringer, Brett W;Wookey, Peter J;Wootten, Denise;Sexton, Patrick M;Furness, Sebastian G B	Expression and activity of the calcitonin receptor family in a sample of primary human high-grade gliomas.	BACKGROUND: Glioblastoma (GBM) is the most common and aggressive type of primary brain cancer. With median survival of less than 15 months, identification and validation of new GBM therapeutic targets is of critical importance.CONCLUSIONS: This study shows that GPCR signaling can display significant variation depending on cellular system used, and effects seen in model recombinant cell lines or t…	Journal Article	eng	PMC6379965	10.1186/s12885-019-5369-y	Aged;Aged, 80 and over;Brain Neoplasms;Calcitonin Receptor-Like Protein;Cell Culture Techniques;Cell Proliferation;Glioblastoma;Humans;Middle Aged;Mitogen-Activated Protein Kinases;Phosphorylation;Receptor Activity-Modifying Protein 1;Receptor Activity-Modifying Protein 2;Receptors, Calcitonin;Signal Transduction;Survival Analysis;Transcriptome;p38 Mitogen-Activated Protein Kinases	10.2981	17.5019	-1.8958	Proteomics	135
30718520	2019	Cell death &amp; disease	Serrano-Saenz, Santiago;Palacios, Carmen;Delgado-Bellido, Daniel;López-Jiménez, Laura;Garcia-Diaz, Angel;Soto-Serrano, Yolanda;Casal, J Ignacio;Bartolomé, Rubén A;Fernández-Luna, José Luis;López-Rivas, Abelardo;Oliver, F Javier	PIM kinases mediate resistance of glioblastoma cells to TRAIL by a p62/SQSTM1-dependent mechanism.	Glioblastoma (GBM) is the most common and aggressive brain tumor and is associated with poor prognosis. GBM cells are frequently resistant to tumor necrosis factor-related apoptosis-inducing ligand (TRAIL) and finding new combinatorial therapies to sensitize glioma cells to TRAIL remains an important challenge. PIM kinases are serine/threonine kinases that promote cell survival and proliferation …	Journal Article	eng	PMC6362213	10.1038/s41419-018-1293-3		12.7862	14.8706	-6.37076	Proteomics	135
30651332	2019	The Journal of neuroscience : the official journal of the Society for Neuroscience	Caragher, Seamus P;Shireman, Jack M;Huang, Mei;Miska, Jason;Atashi, Fatemeh;Baisiwala, Shivani;Hong Park, Cheol;Saathoff, Miranda R;Warnke, Louisa;Xiao, Ting;Lesniak, Maciej S;James, C David;Meltzer, Herbert;Tryba, Andrew K;Ahmed, Atique U	Activation of Dopamine Receptor 2 Prompts Transcriptomic and Metabolic Plasticity in Glioblastoma.	Glioblastoma (GBM) is one of the most aggressive and lethal tumor types. Evidence continues to accrue indicating that the complex relationship between GBM and the brain microenvironment contributes to this malignant phenotype. However, the interaction between GBM and neurotransmitters, signaling molecules involved in neuronal communication, remains incompletely understood. Here we examined, using…	Journal Article	eng	PMC6507082	10.1523/JNEUROSCI.1589-18.2018		15.732	16.5818	-3.22842	Proteomics	135
30639261	2019	Cell chemical biology	Liu, Zhenzhen;Li, Hongli;He, Lian;Xiang, Yu;Tian, Chengsen;Li, Can;Tan, Peng;Jing, Ji;Tian, Yanpin;Du, Lupei;Huang, Yun;Han, Leng;Li, Minyong;Zhou, Yubin	Discovery of Small-Molecule Inhibitors of the HSP90-Calcineurin-NFAT Pathway against Glioblastoma.	Glioblastoma (GBM) is among the most common and malignant types of primary brain tumors in adults, with a dismal prognosis. Although alkylating agents such as temozolomide are widely applied as the first-line treatment for GBM, they often cause chemoresistance and remain ineffective with recurrent GBM. Alternative therapeutics against GBM are urgently needed in the clinic. We report herein the di…	Journal Article	eng	PMC6430684	10.1016/j.chembiol.2018.11.009	Animals;Antineoplastic Agents;Apoptosis;Calcineurin;Calcium;Cell Line, Tumor;Cell Movement;Drug Evaluation, Preclinical;Drug Resistance, Neoplasm;G2 Phase Cell Cycle Checkpoints;Glioblastoma;Glycolysis;HSP90 Heat-Shock Proteins;Humans;Mice;Mice, Nude;NFATC Transcription Factors;Signal Transduction;Small Molecule Libraries;Transplantation, Heterologous	14.287	16.999	-6.52505	Proteomics	135
30602536	2019	Science translational medicine	Yang, Wei;Warrington, Nicole M;Taylor, Sara J;Whitmire, Paula;Carrasco, Eduardo;Singleton, Kyle W;Wu, Ningying;Lathia, Justin D;Berens, Michael E;Kim, Albert H;Barnholtz-Sloan, Jill S;Swanson, Kristin R;Luo, Jingqin;Rubin, Joshua B	Sex differences in GBM revealed by analysis of patient imaging, transcriptome, and survival data.	Sex differences in the incidence and outcome of human disease are broadly recognized but, in most cases, not sufficiently understood to enable sex-specific approaches to treatment. Glioblastoma (GBM), the most common malignant brain tumor, provides a case in point. Despite well-established differences in incidence and emerging indications of differences in outcome, there are few insights that dis…	Journal Article	eng	PMC6502224	10.1126/scitranslmed.aao5253	Cell Line, Tumor;Cohort Studies;Diagnostic Imaging;Disease-Free Survival;Female;Gene Expression Regulation, Neoplastic;Glioblastoma;Humans;Isocitrate Dehydrogenase;Magnetic Resonance Imaging;Male;Mutation;Sex Characteristics;Signal Transduction;Transcriptome	13.792	15.392	2.82593	Proteomics	135
30597867	2019	International journal of molecular sciences	Kosgodage, Uchini S;Uysal-Onganer, Pinar;MacLatchy, Amy;Kraev, Igor;Chatterton, Nicholas P;Nicholas, Anthony P;Inal, Jameel M;Lange, Sigrun	Peptidylarginine Deiminases Post-Translationally Deiminate Prohibitin and Modulate Extracellular Vesicle Release and MicroRNAs in Glioblastoma Multiforme.	Glioblastoma multiforme (GBM) is the most aggressive form of adult primary malignant brain tumour with poor prognosis. Extracellular vesicles (EVs) are a key-mediator through which GBM cells promote a pro-oncogenic microenvironment. Peptidylarginine deiminases (PADs), which catalyze the post-translational protein deimination of target proteins, are implicated in cancer, including via EV modulatio…	Journal Article	eng	PMC6337164	10.3390/ijms20010103	Antineoplastic Agents;Biological Transport;Cell Line, Tumor;Cell Survival;Chromatography, Liquid;Extracellular Vesicles;Glioblastoma;Histones;Humans;MicroRNAs;Ornithine;Protein Processing, Post-Translational;Protein-Arginine Deiminases;Proteome;Proteomics;Tandem Mass Spectrometry	13.6654	14.6409	-4.61824	Proteomics	135
30552330	2018	Nature communications	Stathias, Vasileios;Jermakowicz, Anna M;Maloof, Marie E;Forlin, Michele;Walters, Winston;Suter, Robert K;Durante, Michael A;Williams, Sion L;Harbour, J William;Volmar, Claude-Henry;Lyons, Nicholas J;Wahlestedt, Claes;Graham, Regina M;Ivan, Michael E;Komotar, Ricardo J;Sarkaria, Jann N;Subramanian, Aravind;Golub, Todd R;Schürer, Stephan C;Ayad, Nagi G	Drug and disease signature integration identifies synergistic combinations in glioblastoma.	Glioblastoma (GBM) is the most common primary adult brain tumor. Despite extensive efforts, the median survival for GBM patients is approximately 14 months. GBM therapy could benefit greatly from patient-specific targeted therapies that maximize treatment efficacy. Here we report a platform termed SynergySeq to identify drug combinations for the treatment of GBM by integrating information from Th…	Journal Article	eng	PMC6294341	10.1038/s41467-018-07659-z	Cell Line, Tumor;Cell Proliferation;Computational Biology;Datasets as Topic;Drug Combinations;Drug Discovery;Drug Screening Assays, Antitumor;Drug Synergism;Gene Expression Profiling;Gene Expression Regulation, Neoplastic;Gene Library;Gene Regulatory Networks;Glioblastoma;Humans;Multigene Family;Transcriptome;Treatment Outcome;United States;United States Food and Drug Administration	13.6846	18.0249	0.665887	Proteomics	135
30529802	2018	Journal of the neurological sciences	Ruan, Miaomiao;Liu, Jiying;Ren, Xueyang;Li, Chu;Zhao, Allan Z;Li, Lin;Yang, Haiyuan;Dai, Yifan;Wang, Ying	Whole transcriptome sequencing analyses of DHA treated glioblastoma cells.	Glioblastoma (GBM) is a typical malignant tumor, and there are no effective drugs capable of improving patient survival. Docosahexaenoic acid (DHA), a nutrient essential to animal health and neurodevelopment, exerts an anticancer effect in several types of cancer. However, the function of DHA in GBM is still unclear. Here, we showed that DHA could repress the migration and invasion of GBM U251 ce…	Journal Article	eng		10.1016/j.jns.2018.11.027	Annexin A5;Antineoplastic Agents;Apoptosis;Cell Line, Tumor;Cell Movement;Computational Biology;Docosahexaenoic Acids;Dose-Response Relationship, Drug;Fluorescein-5-isothiocyanate;Gene Expression Regulation, Neoplastic;Gene Regulatory Networks;Glioblastoma;Humans;Neoplasm Invasiveness;RNA, Messenger;Time Factors;Whole Exome Sequencing;Wound Healing	14.197	16.1563	-3.05233	Proteomics	135
30503550	2018	Cancer letters	Hwang, Ji Young;Park, Jung Hwa;Kim, Min Jae;Kim, Woo Jean;Ha, Ki-Tae;Choi, Byung Tae;Lee, Seo-Yeon;Shin, Hwa Kyoung	Isolinderalactone regulates the BCL-2/caspase-3/PARP pathway and suppresses tumor growth in a human glioblastoma multiforme xenograft mouse model.	Glioblastoma multiforme (GBM) is the most common malignant brain tumor, which remains incurable. Plant extracts are a potential source of potent anticancer medicines. In this study, we investigated the effect of isolinderalactone from Lindera aggregata on tumor growth using U-87 human glioblastoma cells. Treatment with isolinderalactone inhibited cell viability and promoted apoptotic cell death. …	Journal Article	eng		10.1016/j.canlet.2018.11.027	Animals;Antineoplastic Agents, Phytogenic;Brain Neoplasms;Caspase 3;Cell Line, Tumor;Cell Survival;Gene Expression Regulation, Neoplastic;Glioblastoma;Humans;Injections, Intraperitoneal;Lindera;Mice;Poly(ADP-ribose) Polymerases;Proteomics;Proto-Oncogene Proteins c-bcl-2;Sesquiterpenes;Signal Transduction;Xenograft Model Antitumor Assays	11.8562	16.6154	-6.0952	Proteomics	135
30401645	2018	Gene	Patil, Vikas;Mahalingam, Kulandaivelu	Comprehensive analysis of Reverse Phase Protein Array data reveals characteristic unique proteomic signatures for glioblastoma subtypes.	The most common and lethal type of intracranial tumors include the astrocytomas. Grade IV astrocytoma or Glioblastoma (GBM) is highly aggressive and treatment-refractory with a median survival of only 14 to 16 months. Molecular profiling of GBMs reveals a high degree of intra- and inter-tumoral heterogeneity, and hence it is important to understand the important signalling axes that get deregulat…	Journal Article	eng		10.1016/j.gene.2018.10.069	Brain Neoplasms;Computational Biology;Gene Expression Regulation, Neoplastic;Glioblastoma;Humans;Molecular Sequence Annotation;Mutation;Neoplasm Grading;Phenotype;Prognosis;Protein Array Analysis;Proteome;Proteomics;Survival Analysis	13.1802	14.5591	5.79889	Proteomics	135
30348936	2018	Medical science monitor : international medical journal of experimental and clinical research	Wang, Yu;Su, Yan;Ji, Zhiling;Lv, Zhonghua	High Expression of PTPN3 Predicts Progression and Unfavorable Prognosis of Glioblastoma.	BACKGROUND PTPN3 was demonstrated to be involved in the progression of several types of cancers, such as gastric adenocarcinoma, lung cancer, and intrahepatic cholangiocarcinoma. However, its clinical significance in glioblastoma (GBM) has not been elucidated. MATERIAL AND METHODS We investigated the expression of PTPN3 in 95 cases of GBM with immunohistochemistry and in 8 pairs of fresh GBMs and…	Journal Article	eng	PMC6354633	10.12659/MSM.911531	Adult;Aged;Brain Neoplasms;Cell Line, Tumor;Cell Proliferation;Disease Progression;Female;Glioblastoma;Humans;Immunohistochemistry;Kaplan-Meier Estimate;Male;Middle Aged;Prognosis;Protein Tyrosine Phosphatase, Non-Receptor Type 3;RNA Interference;Transcriptome	18.0953	13.0916	-5.06802	Proteomics	135
30347783	2018	Proteomes	Samuel, Sabrina Francesca;Marsden, Alistair James;Deepak, Srihari;Rivero, Francisco;Greenman, John;Beltran-Alvarez, Pedro	Inhibiting Arginine Methylation as a Tool to Investigate Cross-Talk with Methylation and Acetylation Post-Translational Modifications in a Glioblastoma Cell Line.	Glioblastomas (GBM) are the most common grade 4 brain tumours; patients have very poor prognosis with an average survival of 15 months after diagnosis. Novel research lines have begun to explore aberrant protein arginine methylation (ArgMe) as a possible therapeutic target in GBM and ArgMe inhibitors are currently in clinical trials. Enzymes known as protein arginine methyltransferases (PRMT1-9) …	Journal Article	eng	PMC6313862	10.3390/proteomes6040044		12.9214	17.855	-2.94522	Proteomics	135
30279734	2018	Theranostics	Wang, Qixue;Cai, Jinquan;Fang, Chuan;Yang, Chao;Zhou, Junhu;Tan, Yanli;Wang, Yunfei;Li, Yansheng;Meng, Xiangqi;Zhao, Kai;Yi, Kaikai;Zhang, Sijing;Zhang, Jianning;Jiang, Chuanlu;Zhang, Jing;Kang, Chunsheng	Mesenchymal glioblastoma constitutes a major ceRNA signature in the TGF-β pathway.	Rationale: Competitive endogenous RNA (ceRNA) networks play important roles in posttranscriptional regulation. Their dysregulation is common in cancer. However, ceRNA signatures have been poorly examined in the invasive and aggressive phenotypes of mesenchymal glioblastoma (GBM). This study aims to characterize mesenchymal glioblastoma at the mRNA-miRNA level and identify the mRNAs in ceRNA netwo…	Journal Article	eng	PMC6160778	10.7150/thno.26550	Animals;Brain Neoplasms;Carcinogenesis;Cell Line, Tumor;Disease Models, Animal;Gene Expression Regulation;Gene Regulatory Networks;Glioblastoma;Heterografts;Humans;Mice;MicroRNAs;Neoplasm Transplantation;RNA, Messenger;Transcriptome;Transforming Growth Factor beta	11.0095	14.6837	6.86182	Proteomics	135
30248944	2018	International journal of molecular sciences	Haas, Bodo;Schütte, Lena;Wos-Maganga, Maria;Weickhardt, Sandra;Timmer, Marco;Eckstein, Niels	Thioredoxin Confers Intrinsic Resistance to Cytostatic Drugs in Human Glioma Cells.	Thioredoxin (Trx) overexpression is known to be a cause of chemotherapy resistance in various tumor entities. However, Trx effects on resistance are complex and depend strictly on tissue type. In the present study, we analyzed the impact of the Trx system on intrinsic chemoresistance of human glioblastoma multiforme (GBM) cells to cytostatic drugs. Resistance of GBM cell lines and primary cells t…	Journal Article	eng	PMC6212897	10.3390/ijms19102874	Apoptosis;Blotting, Western;Carrier Proteins;Cell Line, Tumor;Cytostatic Agents;Disulfides;Glioblastoma;Glioma;Humans;Imidazoles;Models, Biological;Temozolomide;Thioredoxins	12.4081	16.4511	-7.2292	Proteomics	135
30082792	2018	Nature communications	Jun, Hyun Jung;Appleman, Vicky A;Wu, Hua-Jun;Rose, Christopher M;Pineda, Javier J;Yeo, Alan T;Delcuze, Bethany;Lee, Charlotte;Gyuris, Aron;Zhu, Haihao;Woolfenden, Steve;Bronisz, Agnieszka;Nakano, Ichiro;Chiocca, Ennio A;Bronson, Roderick T;Ligon, Keith L;Sarkaria, Jann N;Gygi, Steve P;Michor, Franziska;Mitchison, Timothy J;Charest, Al	A PDGFRα-driven mouse model of glioblastoma reveals a stathmin1-mediated mechanism of sensitivity to vinblastine.	Glioblastoma multiforme (GBM) is an aggressive primary brain cancer that includes focal amplification of PDGFRα and for which there are no effective therapies. Herein, we report the development of a genetically engineered mouse model of GBM based on autocrine, chronic stimulation of overexpressed PDGFRα, and the analysis of GBM signaling pathways using proteomics. We discover the tubulin-binding …	Journal Article	eng	PMC6078993	10.1038/s41467-018-05036-4	Animals;Antineoplastic Agents;Apoptosis;Breast Neoplasms;Cell Cycle;Cell Survival;Cells, Cultured;Computational Biology;Disease Models, Animal;Drug Resistance, Neoplasm;Female;Gene Expression Regulation, Neoplastic;Glioblastoma;Humans;Magnetic Resonance Imaging;Male;Mice;Neoplasm Transplantation;Phosphorylation;Proteomics;Receptor, Platelet-Derived Growth Factor beta;Signal Transduction;Stathmin;…	14.9898	17.0516	-2.89858	Proteomics	135
29976632	2018	Cancer genomics &amp; proteomics	Lehrer, Steven;Rheinstein, Peter H;Rosenzweig, Kenneth E	Glioblastoma Multiforme: Fewer Tumor Copy Number Segments of the SGK1 Gene Are Associated with Poorer Survival.	AIM: Glioblastoma multiforme (GBM) is the most common primary tumor of the central nervous system. The serum and glucocorticoid-regulated kinase SGK1 gene is required for the growth and survival of GBM stem-like cells under both normoxic and hypoxic conditions. It has been reported that oxygenation significantly affects cellular genetic expression; 30% of the genes required in hypoxia were not re…	Journal Article	eng	PMC6070715	10.21873/cgp.20085	Biomarkers, Tumor;Brain Neoplasms;Cohort Studies;Combined Modality Therapy;DNA Copy Number Variations;DNA Methylation;Female;Follow-Up Studies;Glioblastoma;Humans;Immediate-Early Proteins;Male;Middle Aged;Prognosis;Protein-Serine-Threonine Kinases;Survival Rate	16.7126	17.1656	2.36916	Proteomics	135
29927716	2018	Omics : a journal of integrative biology	Jayaram, Savita;Balakrishnan, Lavanya;Singh, Manika;Zabihi, Azin;Ganesh, Raksha A;Mangalaparthi, Kiran K;Sonpatki, Pranali;Gupta, Manoj Kumar;Amaresha, Chaitra B;Prasad, Komal;Mariswamappa, Kiran;Pillai, Shibu;Lakshmikantha, Akhila;Shah, Nameeta;Sirdeshmukh, Ravi	Identification of a Novel Splice Variant of Neural Cell Adhesion Molecule in Glioblastoma Through Proteogenomics Analysis.	Splice variants are known to be important in the pathophysiology of tumors, including the brain cancers. We applied a proteogenomics pipeline to identify splice variants in glioblastoma (GBM, grade IV glioma), a highly malignant brain tumor, using in-house generated mass spectrometric proteomic data and public domain RNASeq dataset. Our analysis led to the identification of a novel exon that maps…	Journal Article	eng		10.1089/omi.2017.0220	Blotting, Western;CD56 Antigen;Gene Expression Regulation, Neoplastic;Glioblastoma;Humans;Mass Spectrometry;Neural Cell Adhesion Molecules;Protein Binding;Proteogenomics	16.6487	10.6034	-0.243205	Proteomics	135
29901201	2018	Oncology reports	Zhang, Yong;Xia, Qiming;Lin, Jun	Identification of the potential oncogenes in glioblastoma based on bioinformatic analysis and elucidation of the underlying mechanisms.	Glioblastoma (GBM) is a common malignant tumour in the human brain, but its molecular mechanisms have not been systematically evaluated. The aim of this study was to identify potential key oncogenes associated with the progression of GBM and to elucidate their mechanisms. The gene expression profile of GSE50161, selected from the Gene Expression Omnibus database, was analysed to find cancer‑assoc…	Journal Article	eng	PMC6072298	10.3892/or.2018.6483	Brain Neoplasms;CDC2 Protein Kinase;Cdc20 Proteins;Cell Line, Tumor;Cell Proliferation;Computational Biology;Cyclin B1;Gene Expression Profiling;Gene Expression Regulation, Neoplastic;Gene Ontology;Gene Regulatory Networks;Glioblastoma;Humans;Oncogenes;Signal Transduction;Transcriptome;Up-Regulation	16.4426	14.2698	-0.871783	Proteomics	135
29852183	2018	Experimental and molecular pathology	Daniel, Paul M;Filiz, Gulay;Tymms, Martin J;Ramsay, Robert G;Kaye, Andrew H;Stylli, Stanley S;Mantamadiotis, Theo	Intratumor MAPK and PI3K signaling pathway heterogeneity in glioblastoma tissue correlates with CREB signaling and distinct target gene signatures.	Limitations in discovering useful tumor biomarkers and drug targets is not only due to patient-to-patient differences but also due to intratumor heterogeneity. Heterogeneity arises due to the genetic and epigenetic variation of tumor cells in response to microenvironmental interactions and cytotoxic therapy. We explored specific signaling pathway activation in glioblastoma (GBM) by investigating …	Journal Article	eng		10.1016/j.yexmp.2018.05.009	Brain Neoplasms;Cell Proliferation;Cyclic AMP Response Element-Binding Protein;Gene Expression Regulation, Neoplastic;Genetic Heterogeneity;Glioblastoma;Humans;Hyaluronan Receptors;MAP Kinase Signaling System;Phosphatidylinositol 3-Kinases;Transcriptome	11.1341	15.0469	6.65777	Proteomics	135
29805753	2018	Oncotarget	Doan, Ninh B;Nguyen, Ha S;Alhajala, Hisham S;Jaber, Basem;Al-Gizawiy, Mona M;Ahn, Eun-Young Erin;Mueller, Wade M;Chitambar, Christopher R;Mirza, Shama P;Schmainda, Kathleen M	Identification of radiation responsive genes and transcriptome profiling via complete RNA sequencing in a stable radioresistant U87 glioblastoma model.	The absence of major progress in the treatment of glioblastoma (GBM) is partly attributable to our poor understanding of both GBM tumor biology and the acquirement of treatment resistance in recurrent GBMs. Recurrent GBMs are characterized by their resistance to radiation. In this study, we used an established stable U87 radioresistant GBM model and total RNA sequencing to shed light on global mR…	Journal Article	eng	PMC5955095	10.18632/oncotarget.25247		18.2702	18.1755	-3.81592	Proteomics	135
29724999	2018	Cell death &amp; disease	Xu, Dongchao;Liu, Ajuan;Wang, Xuan;Chen, Yidan;Shen, Yunyun;Tan, Zhou;Qiu, Mengsheng	Repression of Septin9 and Septin2 suppresses tumor growth of human glioblastoma cells.	Glioblastoma (GBM) is the most common primary malignancy of the central nervous system (CNS) with &lt;10% 5-year survival rate. The growth and invasion of GBM cells into normal brain make the resection and treatment difficult. A better understanding of the biology of GBM cells is crucial to the targeted therapies for the disease. In this study, we identified Septin9 (SEPT9) and Septin2 (SEPT2) as…	Journal Article	eng	PMC5938713	10.1038/s41419-018-0547-4	Animals;Brain Neoplasms;Cell Line, Tumor;Cell Movement;Cell Proliferation;Computational Biology;Cyclin-Dependent Kinase Inhibitor p21;Disease Progression;Gene Expression Regulation, Neoplastic;Glioblastoma;Humans;MAP Kinase Signaling System;Mice;Mice, Nude;Neoplasm Invasiveness;RNA, Small Interfering;S Phase Cell Cycle Checkpoints;Septins;Tumor Burden;Tumor Suppressor Protein p53;Xenograft Model …	17.0779	13.829	-5.42466	Proteomics	135
29718126	2018	Carcinogenesis	Chen, Xuelian;Wen, Qin;Stucky, Andres;Zeng, Yunjing;Gao, Shengjia;Loudon, William G;Ho, Hector W;Kabeer, Mustafa H;Li, Shengwen Calvin;Zhang, Xi;Zhong, Jiang F	Relapse pathway of glioblastoma revealed by single-cell molecular analysis.	Glioblastoma multiforme (GBM) remains an incurable brain tumor. The highly malignant behavior of GBM may, in part, be attributed to its intraclonal genetic and phenotypic diversity (subclonal evolution). Identifying the molecular pathways driving GBM relapse may provide novel, actionable targets for personalized diagnosis, characterization of prognosis and improvement of precision therapy. We scr…	Journal Article	eng	PMC6248540	10.1093/carcin/bgy052	Brain Neoplasms;Glioblastoma;Humans;Male;Meta-Analysis as Topic;Mutation;Neoplasm Recurrence, Local;Prognosis;Recurrence;Signal Transduction;Single-Cell Analysis	15.358	13.3663	2.75766	Proteomics	135
29707108	2018	Oncotarget	Samec, Neja;Jovcevska, Ivana;Stojan, Jure;Zottel, Alja;Liovic, Mirjana;Myers, Michael P;Muyldermans, Serge;Križaj, Igor;Komel, Radovan	Glioblastoma-specific anti-TUFM nanobody for in-vitro immunoimaging and cancer stem cell targeting.	Glioblastoma multiforme (GBM) is the most common and lethal form of brain tumor. The prognosis for patients remains poor, despite the combination of new preoperative and intraoperative neuroimaging, radical surgery, and recent advances in radiotherapy and chemotherapy. To improve GBM therapy and patient outcome, sustained drug delivery to glioma cells is needed, while minimizing toxicity to adjac…	Journal Article	eng	PMC5915116	10.18632/oncotarget.24629		14.2763	17.4054	-3.43644	Proteomics	135
29678575	2018	Biochemical and biophysical research communications	Wang, Hongjin;Li, Li;Yin, Lin	Silencing LncRNA LOXL1-AS1 attenuates mesenchymal characteristics of glioblastoma via NF-κB pathway.	The mesenchymal (MES) subtype of glioblastoma (GBM) suggested worse prognosis and a more malignant phenotype in comparison with their proneural (PN) counterpart. The plasticity between PN and MES transcriptome signatures provided clinical intervention with an manner. Few LncRNA, however, have been discovered to take part in the shift between subtypes. Here, we used transcriptomic data and experim…	Journal Article	eng		10.1016/j.bbrc.2018.04.133	Brain Neoplasms;Cell Line, Tumor;Cell Proliferation;Gene Expression Regulation, Neoplastic;Gene Knockdown Techniques;Gene Silencing;Glioblastoma;Humans;Mesoderm;NF-kappa B;Prognosis;RNA, Long Noncoding;Signal Transduction;Transcription, Genetic	11.0865	14.9539	6.79746	Proteomics	135
29669750	2018	Pharmacological reviews	Shergalis, Andrea;Bankhead, Armand;Luesakul, Urarika;Muangsin, Nongnuj;Neamati, Nouri	Current Challenges and Opportunities in Treating Glioblastoma.	Glioblastoma multiforme (GBM), the most common and aggressive primary brain tumor, has a high mortality rate despite extensive efforts to develop new treatments. GBM exhibits both intra- and intertumor heterogeneity, lending to resistance and eventual tumor recurrence. Large-scale genomic and proteomic analysis of GBM tumors has uncovered potential drug targets. Effective and druggable targets mu…	Journal Article	eng	PMC5907910	10.1124/pr.117.014944	Animals;Antineoplastic Agents;Blood-Brain Barrier;Brain Neoplasms;Drug Delivery Systems;Drug Discovery;Glioblastoma;Humans;Proteomics	13.4113	17.9822	0.759216	Proteomics	135
29510196	2018	Biochimica et biophysica acta. Molecular basis of disease	Qiu, Xin Yao;Hu, Dian Xing;Chen, Wen-Qiang;Chen, Ruo Qiao;Qian, Shi Rui;Li, Chun Yang;Li, Yuan Jun;Xiong, Xin Xin;Liu, Di;Pan, Feng;Yu, Shang Bin;Chen, Xiao Qian	PD-L1 confers glioblastoma multiforme malignancy via Ras binding and Ras/Erk/EMT activation.	Glioblastoma multiforme (GBM) is the most aggressive primary brain tumor due to the lack of effective therapeutic drugs. Cancer therapy targeting programmed cell death protein 1 (PD-1) or programmed death ligand-1 (PD-L1) is of revolutionary. However, the role of intrinsic PD-L1, which determines immune-therapy outcomes, remains largely unclear. Here we demonstrated an oncogenic role of PD-L1 via…	Journal Article	eng		10.1016/j.bbadis.2018.03.002	Animals;B7-H1 Antigen;Epithelial-Mesenchymal Transition;Extracellular Signal-Regulated MAP Kinases;Glioblastoma;Humans;Ice;MAP Kinase Signaling System;Male;Mice, Inbred BALB C;Mice, Nude;Phosphatidylinositol 3-Kinases;Proto-Oncogene Proteins c-akt;Proto-Oncogene Proteins p21(ras);Rats;Rats, Sprague-Dawley	16.3541	13.7808	-5.78818	Proteomics	135
29473166	2018	The Journal of pathology	Tan, Juan;Liu, Mei;Zhang, Jun-Ying;Yao, Yue-Liang;Wang, Yan-Xia;Lin, Yong;Song, Kang;Tan, Jiao;Wu, Jin-Rong;Cui, You-Hong;Wang, Yan;Bian, Xiu-Wu	Capillary morphogenesis protein 2 is a novel prognostic biomarker and plays oncogenic roles in glioma.	Capillary morphogenesis protein 2 (CMG2) was originally identified through its participation in capillary morphogenesis, and subsequently identified as the second receptor for anthrax toxin (ANTXR2). Although tumor-associated functions of CMG2 have also been reported, the clinical significance and functional mechanism of CMG2 in glioma remain to be elucidated. We assessed the clinicopathological …	Journal Article	eng		10.1002/path.5062	Adaptor Proteins, Signal Transducing;Animals;Biomarkers, Tumor;Brain Neoplasms;Cell Line, Tumor;Cell Movement;Cell Proliferation;Databases, Genetic;G2 Phase Cell Cycle Checkpoints;Glioma;HEK293 Cells;Humans;Male;Mice, SCID;Neoplasm Invasiveness;Phosphoproteins;Prognosis;Receptors, Peptide;Signal Transduction;Transcription Factors;Tumor Burden;Tumor Cells, Cultured	15.2858	13.6476	-5.63904	Proteomics	135
29434213	2018	Cell death &amp; disease	Wang, Lian;Shang, Zhouchun;Zhou, Yang;Hu, Xinyu;Chen, Yihong;Fan, Yantao;Wei, Xiaoyu;Wu, Liang;Liang, Qiujuan;Zhang, Jun;Gao, Zhengliang	Autophagy mediates glucose starvation-induced glioblastoma cell quiescence and chemoresistance through coordinating cell metabolism, cell cycle, and survival.	Metabolic reprogramming is pivotal to sustain cancer growth and progression. As such dietary restriction therapy represents a promising approach to starve and treat cancers. Nonetheless, tumors are dynamic and heterogeneous populations of cells with metabolic activities modulated by spatial and temporal contexts. Autophagy is a major pathway controlling cell metabolism. It can downregulate cell m…	Journal Article	eng	PMC5833690	10.1038/s41419-017-0242-x	Autophagy;Cell Cycle;Cell Line, Tumor;Cell Survival;Drug Resistance, Neoplasm;Glioblastoma;Glucose;Humans	13.9451	20.6851	-5.50795	Proteomics	135
29329273	2018	International journal of molecular sciences	Xie, Yongfang;Wang, Ling;Xie, Zengyan;Zeng, Chuisheng;Shu, Kunxian	Transcriptomics Evidence for Common Pathways in Human Major Depressive Disorder and Glioblastoma.	Depression as a common complication of brain tumors. Is there a possible common pathogenesis for depression and glioma? The most serious major depressive disorder (MDD) and glioblastoma (GBM) in both diseases are studied, to explore the common pathogenesis between the two diseases. In this article, we first rely on transcriptome data to obtain reliable and useful differentially expressed genes (D…	Journal Article	eng	PMC5796182	10.3390/ijms19010234	Algorithms;Data Mining;Depressive Disorder, Major;Gene Expression Profiling;Gene Expression Regulation;Gene Expression Regulation, Neoplastic;Glioblastoma;Humans;MicroRNAs;Protein Interaction Maps;Transcriptome	14.4214	14.6438	0.0770865	Proteomics	135
29311133	2018	EMBO molecular medicine	Lhomond, Stéphanie;Avril, Tony;Dejeans, Nicolas;Voutetakis, Konstantinos;Doultsinos, Dimitrios;McMahon, Mari;Pineau, Raphaël;Obacz, Joanna;Papadodima, Olga;Jouan, Florence;Bourien, Heloise;Logotheti, Marianthi;Jégou, Gwénaële;Pallares-Lupon, Néstor;Schmit, Kathleen;Le Reste, Pierre-Jean;Etcheverry, Amandine;Mosser, Jean;Barroso, Kim;Vauléon, Elodie;Maurel, Marion;Samali, Afshin;Patterson, John B;…	Dual IRE1 RNase functions dictate glioblastoma development.	Proteostasis imbalance is emerging as a major hallmark of cancer, driving tumor aggressiveness. Evidence suggests that the endoplasmic reticulum (ER), a major site for protein folding and quality control, plays a critical role in cancer development. This concept is valid in glioblastoma multiform (GBM), the most lethal primary brain cancer with no effective treatment. We previously demonstrated t…	Journal Article	eng	PMC5840541	10.15252/emmm.201707929	Brain Neoplasms;Carcinogenesis;Cell Line, Tumor;Endoribonucleases;Gene Expression Regulation, Neoplastic;Glioblastoma;Humans;Models, Biological;Mutation;Neoplasm Proteins;Phenotype;Protein-Serine-Threonine Kinases;RNA Splicing;RNA, Messenger;Signal Transduction;Tumor Microenvironment	16.4621	11.5898	-0.274485	Proteomics	135
29228611	2017	Oncotarget	Song, Ying-Chun;Lu, Gai-Xia;Zhang, Hong-Wei;Zhong, Xiao-Ming;Cong, Xian-Ling;Xue, Shao-Bo;Kong, Rui;Li, Dan;Chang, Zheng-Yan;Wang, Xiao-Feng;Zhang, Yun-Jie;Sun, Ran;Chai, Li;Xie, Ru-Ting;Cai, Ming-Xiang;Sun, Ming;Mao, Wei-Qing;Yang, Hui-Qiong;Shao, Yun-Chao;Fan, Su-Yun;Wu, Ting-Miao;Xia, Qing;Lv, Zhong-Wei;Fu, David A;Ma, Yu-Shui	Proteogenomic characterization and integrative analysis of glioblastoma multiforme.	Glioblastoma multiforme (GBM), the most aggressive and lethal primary brain tumor, is characterized by very low life expectancy. Understanding the genomic and proteogenomic characteristics of GBM is essential for devising better therapeutic approaches.Here, we performed proteomic profiling of 8 GBM and paired normal brain tissues. In parallel, comprehensive integrative genomic analysis of GBM was…	Journal Article	eng	PMC5722563	10.18632/oncotarget.21937		15.4441	13.8894	-0.408332	Proteomics	135
29169920	2017	Journal of genetics and genomics = Yi chuan xue bao	Chen, Cong;Shi, Yu;Li, Yong;He, Zhi-Cheng;Zhou, Kai;Zhang, Xiao-Ning;Yang, Kai-Di;Wu, Jin-Rong;Kung, Hsiang-Fu;Ping, Yi-Fang;Bian, Xiu-Wu	A glycolysis-based ten-gene signature correlates with the clinical outcome, molecular subtype and IDH1 mutation in glioblastoma.	Reprogrammed metabolism is a hallmark of cancer. Glioblastoma (GBM) tumor cells predominantly utilize aerobic glycolysis for the biogenesis of energy and intermediate nutrients. However, in GBM, the clinical significance of glycolysis and its underlying relations with the molecular features such as IDH1 mutation and subtype have not been elucidated yet. Herein, based on glioma datasets including …	Journal Article	eng		10.1016/j.jgg.2017.05.007	Adult;Aged;Biomarkers, Pharmacological;Brain Neoplasms;DNA Methylation;Female;Gene Expression Regulation, Enzymologic;Gene Expression Regulation, Neoplastic;Genetic Association Studies;Glioblastoma;Glioma;Glycolysis;Humans;Isocitrate Dehydrogenase;Male;Middle Aged;Mutation;Prognosis;Survival Analysis;Transcriptome	13.5323	15.0414	4.82323	Proteomics	135
29016807	2017	Neuro-oncology	Rahme, Gilbert J;Luikart, Bryan W;Cheng, Chao;Israel, Mark A	A recombinant lentiviral PDGF-driven mouse model of proneural glioblastoma.	Mouse models of glioblastoma (GBM), the most aggressive primary brain tumor, are critical for understanding GBM pathology and can contribute to the preclinical evaluation of therapeutic agents. Platelet-derived growth factor (PDGF) signaling has been implicated in the development and pathogenesis of GBM, specifically the proneural subtype. Although multiple mouse models of PDGF-driven glioma have…	Journal Article	eng	PMC5817944	10.1093/neuonc/nox129	Animals;Brain Neoplasms;Cell Proliferation;Cell Transformation, Neoplastic;Cyclin-Dependent Kinase Inhibitor p16;Disease Models, Animal;Female;Glioblastoma;Humans;Lentivirus;Lymphokines;Male;Mice;Mice, Inbred C57BL;Mice, SCID;Mice, Transgenic;Platelet-Derived Growth Factor;Signal Transduction;Tumor Cells, Cultured	14.7415	18.2598	-2.07685	Proteomics	135
28969644	2017	Cell communication and signaling : CCS	Oliveira, Ana Isabel;Anjo, Sandra I;Vieira de Castro, Joana;Serra, Sofia C;Salgado, António J;Manadas, Bruno;Costa, Bruno M	Crosstalk between glial and glioblastoma cells triggers the &quot;go-or-grow&quot; phenotype of tumor cells.	Glioblastoma (GBM), the most malignant primary brain tumor, leads to poor and unpredictable clinical outcomes. Recent studies showed the tumor microenvironment has a critical role in regulating tumor growth by establishing a complex network of interactions with tumor cells. In this context, we investigated how GBM cells modulate resident glial cells, particularly their paracrine activity, and how…	Journal Article	eng	PMC5625790	10.1186/s12964-017-0194-x	Animals;Brain Neoplasms;Cell Line, Tumor;Cell Proliferation;Cell Survival;Cells, Cultured;Culture Media, Conditioned;Glioblastoma;MAP Kinase Signaling System;Mice;Mice, Inbred C57BL;Neuroglia;Paracrine Communication;Phenotype;Proteome	16.5728	16.0682	-3.84185	Proteomics	135
28969635	2017	Journal of translational medicine	Vieira de Castro, Joana;Gomes, Eduardo D;Granja, Sara;Anjo, Sandra I;Baltazar, Fátima;Manadas, Bruno;Salgado, António J;Costa, Bruno M	Impact of mesenchymal stem cells' secretome on glioblastoma pathophysiology.	Glioblastoma (GBM) is a highly aggressive primary brain cancer, for which curative therapies are not available. An emerging therapeutic approach suggested to have potential to target malignant gliomas has been based on the use of multipotent mesenchymal stem cells (MSCs), either unmodified or engineered to deliver anticancer therapeutic agents, as these cells present an intrinsic capacity to migr…	Journal Article	eng	PMC5625623	10.1186/s12967-017-1303-8	Brain Neoplasms;Cell Line, Tumor;Cell Movement;Cell Proliferation;Cell Survival;Culture Media, Conditioned;Dacarbazine;Gene Expression Regulation, Neoplastic;Glioblastoma;Human Umbilical Vein Endothelial Cells;Humans;Mesenchymal Stem Cells;Proteome;Temozolomide	14.2971	16.6766	-3.73125	Proteomics	135
28926524	2017	Medical science monitor : international medical journal of experimental and clinical research	Zhang, Wenqing;Sun, Ying;Liu, Lei;Li, Zongpeng	Prognostic Significance of TNFR-Associated Factor 1 and 2 (TRAF1 and TRAF2) in Glioblastoma.	BACKGROUND TNFR-associated factor 1 (TRAF1) and TRAF2 have been demonstrated to inhibit apoptosis and promote cell survival in glioblastoma (GBM) cells with experiments in vitro. However, their clinical and prognostic significance have not been elucidated. MATERIAL AND METHODS In our study, we for the first time investigated the expression of TRAF1 and TRAF2 in 105 GBM tissues. Furthermore, we ev…	Journal Article	eng	PMC5616136	10.12659/msm.903397	Adult;Aged;Apoptosis;Biomarkers, Tumor;Brain Neoplasms;China;Female;Glioblastoma;Humans;Kaplan-Meier Estimate;Male;Middle Aged;Prognosis;Survival Rate;TNF Receptor-Associated Factor 1;TNF Receptor-Associated Factor 2;Transcriptome	17.995	13.8427	-2.35352	Proteomics	135
28735518	2017	European journal of histochemistry : EJH	Sferra, Roberta;Pompili, Simona;Festuccia, Claudio;Marampon, Francesco;Gravina, Giovanni L;Ventura, Luca;Di Cesare, Ernesto;Cicchinelli, Sara;Gaudio, Eugenio;Vetuschi, Antonella	The possible prognostic role of histone deacetylase and transforming growth factor β/Smad signaling in high grade gliomas treated by radio-chemotherapy: a preliminary immunohistochemical study.	Glioblastoma (GBM) is the most common and aggressive tumor of the central nervous system. Unfortunately, patients affected by this disease have a very poor prognosis, due to high level of invasiveness and resistance to standard therapies. Although the molecular profile of GBM has been extensively investigated, the events responsible for its pathogenesis and progression remain largely unknown. His…	Journal Article	eng	PMC5439439	10.4081/ejh.2017.2732	Adult;Aged;Chemoradiotherapy;Female;Glioma;Histone Deacetylases;Humans;Male;Middle Aged;Prognosis;Signal Transduction;Smad2 Protein;Staining and Labeling;Transcriptome;Transforming Growth Factor beta	13.6688	15.9168	-1.85426	Proteomics	135
28654422	2017	Oncotarget	Murnyák, Balázs;Kouhsari, Mahan C;Hershkovitch, Rotem;Kálmán, Bernadette;Marko-Varga, György;Klekner, NA;Hortobágyi, Tibor	PARP1 expression and its correlation with survival is tumour molecular subtype dependent in glioblastoma.	Overexpression of PARP1 exists in various cancers, including glioblastoma (GBM). Although PARP1 inhibition is a promising therapeutic target, no comprehensive study has addressed PARP1's expression characteristics and prognostic role regarding molecular heterogeneity in astrocytomas including GBM. Our aim was to evaluate PARP1's associations with survival, WHO grade, lineage specific markers, and…	Journal Article	eng	PMC5542272	10.18632/oncotarget.18013	Adult;Aged;Biomarkers, Tumor;Brain Neoplasms;Female;Gene Dosage;Gene Expression Profiling;Gene Expression Regulation, Neoplastic;Glioblastoma;Humans;Immunohistochemistry;Kaplan-Meier Estimate;Male;Middle Aged;Mutation;Neoplasm Grading;Poly (ADP-Ribose) Polymerase-1;Prognosis;Protein Binding;Signal Transduction;Tumor Suppressor Protein p53;X-linked Nuclear Protein;Young Adult	12.6535	14.7578	5.99861	Proteomics	135
28564604	2017	Cell reports	Calvert, Andrea E;Chalastanis, Alexandra;Wu, Yongfei;Hurley, Lisa A;Kouri, Fotini M;Bi, Yingtao;Kachman, Maureen;May, Jasmine L;Bartom, Elizabeth;Hua, Youjia;Mishra, Rama K;Schiltz, Gary E;Dubrovskyi, Oleksii;Mazar, Andrew P;Peter, Marcus E;Zheng, Hongwu;James, C David;Burant, Charles F;Chandel, Navdeep S;Davuluri, Ramana V;Horbinski, Craig;Stegh, Alexander H	Cancer-Associated IDH1 Promotes Growth and Resistance to Targeted Therapies in the Absence of Mutation.	Oncogenic mutations in two isocitrate dehydrogenase (IDH)-encoding genes (IDH1 and IDH2) have been identified in acute myelogenous leukemia, low-grade glioma, and secondary glioblastoma (GBM). Our in silico and wet-bench analyses indicate that non-mutated IDH1 mRNA and protein are commonly overexpressed in primary GBMs. We show that genetic and pharmacologic inactivation of IDH1 decreases GBM cel…	Journal Article	eng	PMC5564207	10.1016/j.celrep.2017.05.014	Animals;Apoptosis;Cell Differentiation;Cell Proliferation;Disease Progression;Drug Resistance, Neoplasm;Erlotinib Hydrochloride;Forkhead Transcription Factors;Gene Expression Regulation, Neoplastic;Gene Knockdown Techniques;Glioblastoma;Histones;Isocitrate Dehydrogenase;Ketoglutaric Acids;Lipids;Methylation;Mice;Mice, SCID;Molecular Targeted Therapy;Mutation;NADP;Neoplastic Stem Cells;Protein Kin…	12.5569	17.4132	-4.24702	Proteomics	135
28523289	2017	International journal of scientific research in science, engineering and technology	Ghosh, Somiranjan;Dutta, Sisir;Thorne, Gabriel;Boston, Ava;Barfield, Alexis;Banerjee, Narendra;Walker, Rayshawn;Banerjee, Hirendra Nath	Core Canonical Pathways Involved in Developing Human Glioblastoma Multiforme (GBM).	Glioblastoma multiforme (GBM) is the most common and aggressive type of the primary brain tumors with pathologic hallmarks of necrosis and vascular proliferation. The diagnosis of GBM is currently mostly based on histological examination of brain tumor tissues, after radiological characterization and surgical biopsy. The ability to characterize tumors comprehensively at the molecular level raises…	Journal Article	eng	PMC5432965			13.9042	14.578	0.0893778	Proteomics	135
28469129	2017	Scientific reports	Gollapalli, Kishore;Ghantasala, Saicharan;Kumar, Sachendra;Srivastava, Rajneesh;Rapole, Srikanth;Moiyadi, Aliasgar;Epari, Sridhar;Srivastava, Sanjeeva	Subventricular zone involvement in Glioblastoma - A proteomic evaluation and clinicoradiological correlation.	Glioblastoma multiforme (GBM), the most malignant of all gliomas is characterized by a high degree of heterogeneity and poor response to treatment. The sub-ventricular zone (SVZ) is the major site of neurogenesis in the brain and is rich in neural stem cells. Based on the proximity of the GBM tumors to the SVZ, the tumors can be further classified into SVZ+ and SVZ-. The tumors located in close c…	Journal Article	eng	PMC5431125	10.1038/s41598-017-01202-8	Acute-Phase Proteins;Brain Neoplasms;Carrier Proteins;Cell Cycle Proteins;Cytoskeletal Proteins;Gene Expression Profiling;Glioblastoma;Humans;Lateral Ventricles;Molecular Sequence Annotation;Neoplasm Proteins;Neoplastic Stem Cells;Neural Stem Cells;Neurogenesis;Proteome	12.5922	14.1842	-0.0902482	Proteomics	135
28365151	2017	Cell systems	Ghosh, Dhimankrishna;Funk, Cory C;Caballero, Juan;Shah, Nameeta;Rouleau, Katherine;Earls, John C;Soroceanu, Liliana;Foltz, Greg;Cobbs, Charles S;Price, Nathan D;Hood, Leroy	A Cell-Surface Membrane Protein Signature for Glioblastoma.	We present a systems strategy that facilitated the development of a molecular signature for glioblastoma (GBM), composed of 33 cell-surface transmembrane proteins. This molecular signature, GBMSig, was developed through the integration of cell-surface proteomics and transcriptomics from patient tumors in the REMBRANDT (n = 228) and TCGA datasets (n = 547) and can separate GBM patients from contro…	Journal Article	eng	PMC5512565	10.1016/j.cels.2017.03.004	Biomarkers, Tumor;Brain Neoplasms;Cell Differentiation;Cell Line, Tumor;Cell Membrane;Cell Proliferation;Computational Biology;Gene Expression Profiling;Gene Expression Regulation, Neoplastic;Glioblastoma;Humans;Membrane Proteins;Proteomics;Systems Biology;Transcriptome;Transforming Growth Factor beta	12.4608	12.3123	0.862649	Proteomics	135
28356518	2017	Proceedings of the National Academy of Sciences of the United States of America	Xu, Liang;Chen, Ye;Dutra-Clarke, Marina;Mayakonda, Anand;Hazawa, Masaharu;Savinoff, Steve E;Doan, Ngan;Said, Jonathan W;Yong, William H;Watkins, Ashley;Yang, Henry;Ding, Ling-Wen;Jiang, Yan-Yi;Tyner, Jeffrey W;Ching, Jianhong;Kovalik, Jean-Paul;Madan, Vikas;Chan, Shing-Leng;Müschen, Markus;Breunig, Joshua J;Lin, De-Chen;Koeffler, H Phillip	BCL6 promotes glioma and serves as a therapeutic target.	ZBTB transcription factors orchestrate gene transcription during tissue development. However, their roles in glioblastoma (GBM) remain unexplored. Here, through a functional screening of ZBTB genes, we identify that BCL6 is required for GBM cell viability and that BCL6 overexpression is associated with worse prognosis. In a somatic transgenic mouse model, depletion of Bcl6 inhibits the progressio…	Journal Article	eng	PMC5393201	10.1073/pnas.1609758114	Animals;Brain Neoplasms;Cell Line, Tumor;Gefitinib;Gene Expression Regulation, Neoplastic;Glioblastoma;Glioma;Humans;MAP Kinase Kinase Kinases;Mice, Mutant Strains;Molecular Targeted Therapy;Proto-Oncogene Proteins;Proto-Oncogene Proteins c-bcl-6;Quinazolines;Receptor Protein-Tyrosine Kinases;Signal Transduction;Tumor Suppressor Protein p53;Xenograft Model Antitumor Assays	13.2236	14.5069	-6.01462	Proteomics	135
28339833	2017	Neuro-oncology	Arif, Tasleem;Krelin, Yakov;Nakdimon, Itay;Benharroch, Daniel;Paul, Avijit;Dadon-Klein, Daniela;Shoshan-Barmatz, Varda	VDAC1 is a molecular target in glioblastoma, with its depletion leading to reprogrammed metabolism and reversed oncogenic properties.	Glioblastoma (GBM), an aggressive brain tumor with frequent relapses and a high mortality, still awaits an effective treatment. Like many cancers, GBM cells acquire oncogenic properties, including metabolic reprogramming, vital for growth. As such, tumor metabolism is an emerging avenue for cancer therapy. One relevant target is the voltage-dependent anion channel 1 (VDAC1), a mitochondrial prote…	Journal Article	eng	PMC5570220	10.1093/neuonc/now297	Animals;Brain Neoplasms;Cell Line, Tumor;Cell Proliferation;Gene Expression;Glioblastoma;Humans;Male;Mice, Nude;RNA, Small Interfering;Transcriptome;Voltage-Dependent Anion Channel 1;Xenograft Model Antitumor Assays	14.152	20.2236	-5.32111	Proteomics	135
28076790	2017	Cell reports	Xing, Fan;Luan, Yizhao;Cai, Jing;Wu, Sihan;Mai, Jialuo;Gu, Jiayu;Zhang, Haipeng;Li, Kai;Lin, Yuan;Xiao, Xiao;Liang, Jiankai;Li, Yuan;Chen, Wenli;Tan, Yaqian;Sheng, Longxiang;Lu, Bingzheng;Lu, Wanjun;Gao, Mingshi;Qiu, Pengxin;Su, Xingwen;Yin, Wei;Hu, Jun;Chen, Zhongping;Sai, Ke;Wang, Jing;Chen, Furong;Chen, Yinsheng;Zhu, Shida;Liu, Dongbing;Cheng, Shiyuan;Xie, Zhi;Zhu, Wenbo;Yan, Guangmei	The Anti-Warburg Effect Elicited by the cAMP-PGC1α Pathway Drives Differentiation of Glioblastoma Cells into Astrocytes.	Glioblastoma multiforme (GBM) is among the most aggressive of human cancers. Although differentiation therapy has been proposed as a potential approach to treat GBM, the mechanisms of induced differentiation remain poorly defined. Here, we established an induced differentiation model of GBM using cAMP activators that specifically directed GBM differentiation into astroglia. Transcriptomic and pro…	Journal Article	eng	PMC5926788	10.1016/j.celrep.2016.12.037	8-Bromo Cyclic Adenosine Monophosphate;Astrocytes;Brain Neoplasms;Cell Death;Cell Differentiation;Cell Line, Tumor;Cell Proliferation;Cyclic AMP;Cyclic AMP Response Element-Binding Protein;Gene Expression Profiling;Glial Fibrillary Acidic Protein;Glioblastoma;Glycolysis;Humans;Organelle Biogenesis;Oxidative Phosphorylation;Peroxisome Proliferator-Activated Receptor Gamma Coactivator 1-alpha;Prote…	14.7611	19.6896	-6.08179	Proteomics	135
27689322	2016	Oncotarget	Schmidt, Linnéa;Baskaran, Sathishkumar;Johansson, Patrik;Padhan, Narendra;Matuszewski, Damian;Green, Lydia C;Elfineh, Ludmila;Wee, Shimei;Häggblad, Maria;Martens, Ulf;Westermark, Bengt;Forsberg-Nilsson, Karin;Uhrbom, Lene;Claesson-Welsh, Lena;Andäng, Michael;Sintorn, Ida-Maria;Lundgren, Bo;Lönnstedt, Ingrid;Krona, Cecilia;Nelander, Sven	Case-specific potentiation of glioblastoma drugs by pterostilbene.	Glioblastoma multiforme (GBM, astrocytoma grade IV) is the most common malignant primary brain tumor in adults. Addressing the shortage of effective treatment options for this cancer, we explored repurposing of existing drugs into combinations with potent activity against GBM cells. We report that the phytoalexin pterostilbene is a potentiator of two drugs with previously reported anti-GBM activi…	Journal Article	eng	PMC5341973	10.18632/oncotarget.12298	Aged;Aged, 80 and over;Antineoplastic Agents, Phytogenic;Antineoplastic Combined Chemotherapy Protocols;Brain Neoplasms;Cell Cycle;Cell Line, Tumor;Cell Proliferation;DNA Copy Number Variations;Drug Synergism;Female;Gefitinib;Gene Expression Profiling;Gene Knockdown Techniques;Glioblastoma;Humans;MAP Kinase Signaling System;Male;Middle Aged;Mutation;Phenotype;Protein Kinase Inhibitors;Quinazoline…	12.1716	17.4749	-6.8101	Proteomics	135
27597932	2016	Frontiers in oncology	de Aquino, Priscila F;Carvalho, Paulo Costa;Nogueira, Fábio C S;da Fonseca, Clovis Orlando;de Souza Silva, Júlio Cesar Thomé;Carvalho, Maria da Gloria da Costa;Domont, Gilberto B;Zanchin, Nilson I T;Fischer, Juliana de Saldanha da Gama	A Time-Based and Intratumoral Proteomic Assessment of a Recurrent Glioblastoma Multiforme.	Tumors consist of cells in different stages of transformation with molecular and cellular heterogeneity. By far, heterogeneity is the hallmark of glioblastoma multiforme (GBM), the most malignant and aggressive type of glioma. Most proteomic studies aim in comparing tumors from different patients, but here we dive into exploring the intratumoral proteome diversity of a single GBM. For this, we pr…	Journal Article	eng	PMC4992702	10.3389/fonc.2016.00183		12.4432	13.5123	-0.148772	Proteomics	135
27571886	2016	Neuro-oncology	Kim, Eui Hyun;Lee, Ji-Hyun;Oh, Yoonjee;Koh, Ilkyoo;Shim, Jin-Kyoung;Park, Junseong;Choi, Junjeong;Yun, Mijin;Jeon, Jeong Yong;Huh, Yong Min;Chang, Jong Hee;Kim, Sun Ho;Kim, Kyung-Sup;Cheong, Jae-Ho;Kim, Pilnam;Kang, Seok-Gu	Inhibition of glioblastoma tumorspheres by combined treatment with 2-deoxyglucose and metformin.	Deprivation of tumor bioenergetics by inhibition of multiple energy pathways has been suggested as an effective therapeutic approach for various human tumors. However, this idea has not been evaluated in glioblastoma (GBM). We hypothesized that dual inhibition of glycolysis and oxidative phosphorylation could effectively suppress GBM tumorspheres (TS).</AbstractText>: Deprivation of tumor bioener…	Journal Article	eng	PMC5464255	10.1093/neuonc/now174	Animals;Antimetabolites;Apoptosis;Brain Neoplasms;Cell Proliferation;Deoxyglucose;Drug Synergism;Drug Therapy, Combination;Energy Metabolism;Glioblastoma;Glycolysis;Humans;Hypoglycemic Agents;Metformin;Mice;Mice, Nude;Oxidative Phosphorylation;Tumor Cells, Cultured;Xenograft Model Antitumor Assays	15.2932	19.1831	-5.33243	Proteomics	135
27470408	2016	Biomedicine &amp; pharmacotherapy = Biomedecine &amp; pharmacotherapie	Liao, Hsien-Feng;Lee, Chien-Chin;Hsiao, Pei-Chi;Chen, Yi-Fong;Tseng, Chih-Hua;Tzeng, Cherng-Chyi;Chen, Yeh-Long;Chen, Jui-Chang;Chang, Ya-Sian;Chang, Jan-Gowth	TCH1036, a indeno[1,2-c]quinoline derivative, potentially inhibited the growth of human brain malignant glioma (GBM) 8401 cells via suppression of the expression of Suv39h1 and PARP.	A newly synthesized Indeno[1,2-c]quinoline derivative, which has previously been found to potentially trap DNA-topoisomerase cleavage complexes more effectively than camptothecin, could effectively inhibit the proliferation of a variety of cancers, such as breast cancer treated with TCH1030. In this study, we further explore the activity of the TCH1036, TCH1259 and TCH1030 compounds in suppressin…	Journal Article	eng		10.1016/j.biopha.2016.06.002	Brain Neoplasms;Catalytic Domain;Cell Cycle Checkpoints;Cell Line, Tumor;Cell Proliferation;Gene Expression Regulation, Neoplastic;Glioma;Humans;Methyltransferases;Molecular Docking Simulation;Oximes;Poly (ADP-Ribose) Polymerase-1;Quinolines;RNA, Messenger;Repressor Proteins	12.6044	16.9474	-5.88112	Proteomics	135
27462980	2016	PloS one	de Lucas, A G;Schuhmacher, A J;Oteo, M;Romero, E;Cámara, J A;de Martino, A;Arroyo, A G;Morcillo, M Á;Squatrito, M;Martinez-Torrecuadrada, J L;Mulero, F	Targeting MT1-MMP as an ImmunoPET-Based Strategy for Imaging Gliomas.	BACKGROUND: A critical challenge in the management of Glioblastoma Multiforme (GBM) tumors is the accurate diagnosis and assessment of tumor progression in a noninvasive manner. We have identified Membrane-type 1 matrix metalloproteinase (MT1-MMP) as an attractive biomarker for GBM imaging since this protein is actively involved in tumor growth and progression, correlates with tumor grade and is …	Journal Article	eng	PMC4962974	10.1371/journal.pone.0158634	Animals;Antibodies, Monoclonal;Biomarkers, Tumor;Brain Neoplasms;Cell Line, Tumor;Glioblastoma;Humans;Matrix Metalloproteinase 14;Mice;Mice, Nude;Neoplasm Transplantation;Positron-Emission Tomography;Prognosis;X-Ray Microtomography	14.3859	15.6897	2.1578	Proteomics	135
27456940	2016	Cancer research and treatment : official journal of Korean Cancer Association	Se, Young-Bem;Kim, Seung Hyun;Kim, Ji Young;Kim, Ja Eun;Dho, Yun-Sik;Kim, Jin Wook;Kim, Yong Hwy;Woo, Hyun Goo;Kim, Se-Hyuk;Kang, Shin-Hyuk;Kim, Hak Jae;Kim, Tae Min;Lee, Soon-Tae;Choi, Seung Hong;Park, Sung-Hye;Kim, Il Han;Kim, Dong Gyu;Park, Chul-Kee	Underexpression of HOXA11 Is Associated with Treatment Resistance and Poor Prognosis in Glioblastoma.	PURPOSE: Homeobox (HOX) genes are essential developmental regulators that should normally be in the silenced state in an adult brain. The aberrant expression of HOX genes has been associated with the prognosis of many cancer types, including glioblastoma (GBM). This study examined the identity and role of HOX genes affecting GBM prognosis and treatment resistance.CONCLUSION: The treatment resista…	Journal Article	eng	PMC5398402	10.4143/crt.2016.106	Brain Neoplasms;Cell Line, Tumor;Cell Survival;Down-Regulation;Drug Resistance, Neoplasm;Follow-Up Studies;Gene Expression Profiling;Gene Expression Regulation, Neoplastic;Gene Knockdown Techniques;Gene Regulatory Networks;Glioblastoma;Homeodomain Proteins;Humans;Prognosis;RNA Interference;Transcriptome	12.8595	16.7121	-1.62558	Proteomics	135
27446475	2016	Oncology letters	Bryukhovetskiy, Igor;Shevchenko, Valeriy	Molecular mechanisms of the effect of TGF-β1 on U87 human glioblastoma cells.	Glioblastoma multiforme (GBM) is the most widespread and aggressive type of primary brain tumor. The prognosis following diagnosis with GBM is poor, with a median survival time of 14 months. Tumor cell invasion, metastasis and proliferation are the major causes of mortality in patients with GBM. In order to develop effective GBM treatment methods it is necessary to identify novel targets involved…	Journal Article	eng	PMC4950569	10.3892/ol.2016.4756		17.1563	13.6068	-5.64387	Proteomics	135
27399113	2016	Medicine	You, Hye Jin;Park, Ho-Young;Kim, Jinkuk;Lee, In-Hee;Seol, Ho Jun;Lee, Jung-Il;Kim, Sung Tae;Kong, Doo-Sik;Nam, Do-Hyun	Integrative radiogenomic analysis for genomic signatures in glioblastomas presenting leptomeningeal dissemination.	Despite therapeutic advances, the prognosis for glioblastoma (GBM) remains poor. In particular, leptomeningeal dissemination (LMD) has a dismal prognosis. The aim of this study was to identify tumor molecular phenotype, which has a great propensity to develop LMD. Between May 2004 and December 2012, a total of 145 GBM tumor samples were obtained from data registry. A total of 20 of the 145 patien…	Journal Article	eng	PMC5058842	10.1097/MD.0000000000004109	Adolescent;Adult;Aged, 80 and over;Brain Neoplasms;Female;Genomics;Glioblastoma;Humans;Male;Meningeal Neoplasms;Middle Aged;Phenotype;Prognosis;Registries;Survival Analysis	13.5999	14.9695	3.42063	Proteomics	135
27287018	2016	Genome biology	Correa, Bruna R;de Araujo, Patricia Rosa;Qiao, Mei;Burns, Suzanne C;Chen, Chen;Schlegel, Richard;Agarwal, Seema;Galante, Pedro A F;Penalva, Luiz O F	Functional genomics analyses of RNA-binding proteins reveal the splicing regulator SNRPB as an oncogenic candidate in glioblastoma.	Glioblastoma (GBM) is the most common and aggressive type of brain tumor. Currently, GBM has an extremely poor outcome and there is no effective treatment. In this context, genomic and transcriptomic analyses have become important tools to identify new avenues for therapies. RNA-binding proteins (RBPs) are master regulators of co- and post-transcriptional events; however, their role in GBM remain…	Journal Article	eng	PMC4901439	10.1186/s13059-016-0990-4	Apoptosis;Brain Neoplasms;Cell Proliferation;Cell Survival;Cell Transformation, Neoplastic;Cluster Analysis;Computational Biology;Exons;Gene Expression Profiling;Gene Expression Regulation, Neoplastic;Gene Knockdown Techniques;Genomics;Glioblastoma;Humans;Introns;Molecular Sequence Annotation;Neoplasm Grading;Prognosis;RNA Splicing;RNA-Binding Proteins;Signal Transduction;Transcriptome;snRNP Core…	16.4161	11.7545	-0.254088	Proteomics	135
27270107	2016	Nature genetics	Wang, Jiguang;Cazzato, Emanuela;Ladewig, Erik;Frattini, Veronique;Rosenbloom, Daniel I S;Zairis, Sakellarios;Abate, Francesco;Liu, Zhaoqi;Elliott, Oliver;Shin, Yong-Jae;Lee, Jin-Ku;Lee, In-Hee;Park, Woong-Yang;Eoli, Marica;Blumberg, Andrew J;Lasorella, Anna;Nam, Do-Hyun;Finocchiaro, Gaetano;Iavarone, Antonio;Rabadan, Raul	Clonal evolution of glioblastoma under therapy.	Glioblastoma (GBM) is the most common and aggressive primary brain tumor. To better understand how GBM evolves, we analyzed longitudinal genomic and transcriptomic data from 114 patients. The analysis shows a highly branched evolutionary pattern in which 63% of patients experience expression-based subtype changes. The branching pattern, together with estimates of evolutionary rate, suggests that …	Journal Article	eng	PMC5627776	10.1038/ng.3590	Antineoplastic Agents, Alkylating;Biomarkers, Tumor;Brain Neoplasms;Cell Proliferation;Clonal Evolution;DNA Modification Methylases;DNA Repair Enzymes;Dacarbazine;Gene Expression Regulation, Neoplastic;Genomics;Glioblastoma;Humans;Isocitrate Dehydrogenase;Latent TGF-beta Binding Proteins;Longitudinal Studies;Mutation;Neoplasm Grading;Neoplasm Recurrence, Local;Survival Rate;Temozolomide;Transcrip…	14.5327	15.3242	4.22254	Proteomics	135
27196784	2016	Molecular cancer therapeutics	Lescarbeau, Rebecca S;Lei, Liang;Bakken, Katrina K;Sims, Peter A;Sarkaria, Jann N;Canoll, Peter;White, Forest M	Quantitative Phosphoproteomics Reveals Wee1 Kinase as a Therapeutic Target in a Model of Proneural Glioblastoma.	Glioblastoma (GBM) is the most common malignant primary brain cancer. With a median survival of about a year, new approaches to treating this disease are necessary. To identify signaling molecules regulating GBM progression in a genetically engineered murine model of proneural GBM, we quantified phosphotyrosine-mediated signaling using mass spectrometry. Oncogenic signals, including phosphorylate…	Journal Article	eng	PMC4893926	10.1158/1535-7163.MCT-15-0692	Animals;Biomarkers, Tumor;Brain Neoplasms;CDC2 Protein Kinase;Cell Cycle Proteins;Cell Line, Tumor;Gene Expression Regulation, Neoplastic;Glioblastoma;Humans;Mass Spectrometry;Mice;Molecular Targeted Therapy;Nuclear Proteins;Phosphorylation;Protein-Tyrosine Kinases;Proteomics;Pyrazoles;Pyrimidines;Pyrimidinones;Xenograft Model Antitumor Assays	12.7614	14.9896	-6.58636	Proteomics	135
27116978	2016	Neuro-oncology	Laks, Dan R;Crisman, Thomas J;Shih, Michelle Y S;Mottahedeh, Jack;Gao, Fuying;Sperry, Jantzen;Garrett, Matthew C;Yong, William H;Cloughesy, Timothy F;Liau, Linda M;Lai, Albert;Coppola, Giovanni;Kornblum, Harley I	Large-scale assessment of the gliomasphere model system.	Gliomasphere cultures are widely utilized for the study of glioblastoma (GBM). However, this model system is not well characterized, and the utility of current classification methods is not clear.</AbstractText>: Gliomasphere cultures are widely utilized for the study of glioblastoma (GBM). However, this model system is not well characterized, and the utility of current classification methods is …	Journal Article	eng	PMC5035518	10.1093/neuonc/now045	Blotting, Western;Cell Culture Techniques;Cluster Analysis;Gene Expression Profiling;Gene Regulatory Networks;Glioblastoma;Humans;Oligonucleotide Array Sequence Analysis;Real-Time Polymerase Chain Reaction;Transcriptome;Tumor Cells, Cultured	12.3809	13.1874	4.06873	Proteomics	135
27035264	2016	The journal of physical chemistry. B	Kravchenko-Balasha, Nataly;Johnson, Hannah;White, Forest M;Heath, James R;Levine, R D	A Thermodynamic-Based Interpretation of Protein Expression Heterogeneity in Different Glioblastoma Multiforme Tumors Identifies Tumor-Specific Unbalanced Processes.	We describe a thermodynamic-motivated, information theoretic analysis of proteomic data collected from a series of 8 glioblastoma multiforme (GBM) tumors. GBMs are considered here as prototypes of heterogeneous cancers. That heterogeneity is viewed here as manifesting in different unbalanced biological processes that are associated with thermodynamic-like constraints. The analysis yields a molecu…	Journal Article	eng	PMC4937832	10.1021/acs.jpcb.6b01692	Antineoplastic Combined Chemotherapy Protocols;Brain Neoplasms;Computational Biology;Dasatinib;ErbB Receptors;Erlotinib Hydrochloride;Gene Expression Regulation, Neoplastic;Genes, Reporter;Genetic Heterogeneity;Glioblastoma;Humans;Imatinib Mesylate;Molecular Targeted Therapy;Neoplasm Proteins;Phosphoproteins;Signal Transduction;Thermodynamics	13.1505	14.5814	0.626771	Proteomics	135
26863628	2016	Oncotarget	Kong, Doo-Sik;Kim, Jinkuk;Lee, In-Hee;Kim, Sung Tae;Seol, Ho Jun;Lee, Jung-Il;Park, Woong-Yang;Ryu, Gyuha;Wang, Zichen;Ma'ayan, Avi;Nam, Do-Hyun	Integrative radiogenomic analysis for multicentric radiophenotype in glioblastoma.	We postulated that multicentric glioblastoma (GBM) represents more invasiveness form than solitary GBM and has their own genomic characteristics. From May 2004 to June 2010 we retrospectively identified 51 treatment-naïve GBM patients with available clinical information from the Samsung Medical Center data registry. Multicentricity of the tumor was defined as the presence of multiple foci on the …	Journal Article	eng	PMC4905491	10.18632/oncotarget.7115	Adult;Aged;Brain Neoplasms;Female;Gene Dosage;Genomics;Glioblastoma;Humans;Magnetic Resonance Imaging;Male;Middle Aged;Phenotype;Prognosis;Retrospective Studies;Transcriptome	14.075	15.4506	2.5446	Proteomics	135
26757882	2016	Acta neuropathologica communications	Hinrichs, Benjamin H;Newman, Scott;Appin, Christina L;Dunn, William;Cooper, Lee;Pauly, Rini;Kowalski, Jeanne;Rossi, Michael R;Brat, Daniel J	Farewell to GBM-O: Genomic and transcriptomic profiling of glioblastoma with oligodendroglioma component reveals distinct molecular subgroups.	INTRODUCTION: Glioblastoma with oligodendroglioma component (GBM-O) was recognized as a histologic pattern of glioblastoma (GBM) by the World Health Organization (WHO) in 2007 and is distinguished by the presence of oligodendroglioma-like differentiation. To better understand the genetic underpinnings of this morphologic entity, we performed a genome-wide, integrated copy number, mutational and t…	Journal Article	eng	PMC4711079	10.1186/s40478-015-0270-7	Adult;Aged;Brain Neoplasms;Chromosome Aberrations;Chromosomes, Human, Pair 19;Cyclin-Dependent Kinase Inhibitor p16;Female;Gene Expression;Genomics;Glioblastoma;Humans;Isocitrate Dehydrogenase;Male;Microarray Analysis;Middle Aged;Mutation;Oligodendroglioma;Retrospective Studies;Sequence Analysis, DNA;Tumor Suppressor Protein p53	15.1777	14.9066	6.15041	Proteomics	135
26506620	2015	PloS one	Yong, William H;Shabihkhani, Maryam;Telesca, Donatello;Yang, Shuai;Tso, Jonathan L;Menjivar, Jimmy C;Wei, Bowen;Lucey, Gregory M;Mareninov, Sergey;Chen, Zugen;Liau, Linda M;Lai, Albert;Nelson, Stanley F;Cloughesy, Timothy F;Tso, Cho-Lea	Ribosomal Proteins RPS11 and RPS20, Two Stress-Response Markers of Glioblastoma Stem Cells, Are Novel Predictors of Poor Prognosis in Glioblastoma Patients.	Glioblastoma stem cells (GSC) co-exhibiting a tumor-initiating capacity and a radio-chemoresistant phenotype, are a compelling cell model for explaining tumor recurrence. We have previously characterized patient-derived, treatment-resistant GSC clones (TRGC) that survived radiochemotherapy. Compared to glucose-dependent, treatment-sensitive GSC clones (TSGC), TRGC exhibited reduced glucose depend…	Journal Article	eng	PMC4624638	10.1371/journal.pone.0141334	Adult;Aged;Biomarkers, Tumor;Cell Line, Tumor;DNA Methylation;Female;Gene Expression Regulation, Neoplastic;Genome, Human;Glioblastoma;Humans;Male;Middle Aged;Neoplastic Stem Cells;Phenotype;Prognosis;Ribosomal Proteins;Tissue Array Analysis	16.9485	17.4789	2.39918	Proteomics	135
26484224	2015	Genomics data	Gonçalves, Céline S;Xavier-Magalhães, Ana;Pojo, Marta;Oliveira, Ana Isabel;Correia, Sara;Reis, Rui M;Sousa, Nuno;Rocha, Miguel;Costa, Bruno M	Transcriptional profiling of HOXA9-regulated genes in human glioblastoma cell models.	The data here described pertain to the article by Pojo et al. (2015) [10] titled “A transcriptomic signature mediated by HOXA9 promotes human glioblastoma initiation, aggressiveness and resistance to temozolomide” (Pojoet al., 2015 [10]). HOX genes are part of the homeobox gene family, which encodes transcription factors crucial during embryonic development (Grier et al., 2005; Pearson et al., 20…	Journal Article	eng	PMC4583997	10.1016/j.gdata.2015.05.010		13.7743	15.6295	-1.34576	Proteomics	135
26310374	2015	Translational oncology	Koh, Youngil;Park, Inho;Sun, Chung-Hyun;Lee, Seungmook;Yun, Hongseok;Park, Chul-Kee;Park, Sung-Hye;Park, Joo Kyung;Lee, Se-Hoon	Detection of a Distinctive Genomic Signature in Rhabdoid Glioblastoma, A Rare Disease Entity Identified by Whole Exome Sequencing and Whole Transcriptome Sequencing.	We analyzed the genome of a rhabdoid glioblastoma (R-GBM) tumor, a very rare variant of GBM. A surgical specimen of R-GBM from a 20-year-old woman was analyzed using whole exome sequencing (WES), whole transcriptome sequencing (WTS), single nucleotide polymorphism array, and array comparative genomic hybridization. The status of gene expression in R-GBM tissue was compared with that of normal bra…	Journal Article	eng	PMC4562980	10.1016/j.tranon.2015.05.003		15.4635	15.3184	4.43147	Proteomics	135
26245897	2015	The Journal of biological chemistry	Nijaguna, Mamatha Bangalore;Patil, Vikas;Urbach, Serge;Shwetha, Shivayogi D;Sravani, Kotha;Hegde, Alangar S;Chandramouli, Bangalore A;Arivazhagan, Arimappamagan;Marin, Philippe;Santosh, Vani;Somasundaram, Kumaravel	Glioblastoma-derived Macrophage Colony-stimulating Factor (MCSF) Induces Microglial Release of Insulin-like Growth Factor-binding Protein 1 (IGFBP1) to Promote Angiogenesis.	Glioblastoma (grade IV glioma/GBM) is the most common primary adult malignant brain tumor with poor prognosis. To characterize molecular determinants of tumor-stroma interaction in GBM, we profiled 48 serum cytokines and identified macrophage colony-stimulating factor (MCSF) as one of the elevated cytokines in sera from GBM patients. Both MCSF transcript and protein were up-regulated in GBM tissu…	Journal Article	eng	PMC4645610	10.1074/jbc.M115.664037	Adult;Brain Neoplasms;Cell Line, Tumor;Female;Glioblastoma;Human Umbilical Vein Endothelial Cells;Humans;Insulin-Like Growth Factor Binding Protein 1;Intracellular Signaling Peptides and Proteins;Macrophage Colony-Stimulating Factor;Male;NF-kappa B;Neoplasm Proteins;Neovascularization, Pathologic;Phosphatidylinositol 3-Kinases;Protein-Tyrosine Kinases;Signal Transduction;Syk Kinase	10.0491	13.6092	-4.5349	Proteomics	135
26243272	2015	Molecular &amp; cellular proteomics : MCP	Demeure, Kevin;Fack, Fred;Duriez, Elodie;Tiemann, Katja;Bernard, Amandine;Golebiewska, Anna;Bougnaud, Sébastien;Bjerkvig, Rolf;Domon, Bruno;Niclou, Simone P	Targeted Proteomics to Assess the Response to Anti-Angiogenic Treatment in Human Glioblastoma (GBM).	Glioblastoma (GBM) is a highly aggressive primary brain tumor with dismal outcome for affected patients. Because of the significant neo-angiogenesis exhibited by GBMs, anti-angiogenic therapies have been intensively evaluated during the past years. Recent clinical studies were however disappointing, although a subpopulation of patients may benefit from such treatment. We have previously shown tha…	Journal Article	eng	PMC4739668	10.1074/mcp.M115.052423	Animals;Apoptosis;Bevacizumab;Biomarkers, Tumor;Cell Line, Tumor;Cell Proliferation;Female;Gene Expression Regulation, Neoplastic;Glioblastoma;Humans;Male;Mice;Neoplasm Proteins;Neovascularization, Pathologic;Proteomics;Rats;Xenograft Model Antitumor Assays	12.9616	16.4193	-3.65187	Proteomics	135
26232108	2015	Journal of proteomics	Nijaguna, Mamatha B;Schröder, Christoph;Patil, Vikas;Shwetha, Shivayogi D;Hegde, Alangar S;Chandramouli, Bangalore A;Arivazhagan, Arimappamagan;Santosh, Vani;Hoheisel, Jörg D;Somasundaram, Kumaravel	Definition of a serum marker panel for glioblastoma discrimination and identification of Interleukin 1β in the microglial secretome as a novel mediator of endothelial cell survival induced by C-reactive protein.	Glioblastoma (GBM) is the most common malignant adult primary brain tumor. We profiled 724 cancer-associated proteins in sera of healthy individuals (n=27) and GBM (n=28) using antibody microarray. While 69 proteins exhibited differential abundance in GBM sera, a three-marker panel (LYAM1, BHE40 and CRP) could discriminate GBM sera from that of healthy donors with an accuracy of 89.7% and p&lt;0.…	Journal Article	eng		10.1016/j.jprot.2015.07.026	Biomarkers;Biomarkers, Tumor;C-Reactive Protein;Cell Line, Tumor;Cell Survival;Endothelial Cells;Glioblastoma;Humans;Interleukin-1beta;Microglia;Proteome;Reproducibility of Results;Sensitivity and Specificity	10.2428	13.6654	-4.37254	Proteomics	135
26022161	2015	Tumour biology : the journal of the International Society for Oncodevelopmental Biology and Medicine	Kraus, Theo F J;Kolck, Gesa;Greiner, Andrea;Schierl, Katharina;Guibourt, Virginie;Kretzschmar, Hans A	Loss of 5-hydroxymethylcytosine and intratumoral heterogeneity as an epigenomic hallmark of glioblastoma.	Glioblastoma (GBM) is the most malignant neoplasm with predominant astrocytic differentiation and the most frequent primary brain tumor of the adult. Here, we investigated 170 human GBM specimens deriving from 162 patients, as well as 66 healthy control tissue specimens deriving from 27 patients, and analyzed the amount of 5-hydroxymethylcytosine (5hmC) in GBMs compared to normal brain and tumor …	Journal Article	eng		10.1007/s13277-015-3606-9	5-Methylcytosine;Adult;Aged;Aged, 80 and over;Cytosine;DNA Methylation;DNA Modification Methylases;DNA Repair Enzymes;Epigenesis, Genetic;Female;Glioblastoma;Histones;Humans;Isocitrate Dehydrogenase;Ki-67 Antigen;Loss of Heterozygosity;Male;Middle Aged;Mutation;Prognosis;Promoter Regions, Genetic;Tumor Suppressor Proteins	16.1296	16.3572	2.92345	Proteomics	135
25932951	2015	PloS one	Sanzey, Morgane;Abdul Rahim, Siti Aminah;Oudin, Anais;Dirkse, Anne;Kaoma, Tony;Vallar, Laurent;Herold-Mende, Christel;Bjerkvig, Rolf;Golebiewska, Anna;Niclou, Simone P	Comprehensive analysis of glycolytic enzymes as therapeutic targets in the treatment of glioblastoma.	Major efforts have been put in anti-angiogenic treatment for glioblastoma (GBM), an aggressive and highly vascularized brain tumor with dismal prognosis. However clinical outcome with anti-angiogenic agents has been disappointing and tumors quickly develop escape mechanisms. In preclinical GBM models we have recently shown that bevacizumab, a blocking antibody against vascular endothelial growth …	Journal Article	eng	PMC4416792	10.1371/journal.pone.0123544	Animals;Brain Neoplasms;Cell Hypoxia;Cell Proliferation;Cell Survival;Gene Expression Regulation, Neoplastic;Gene Knockdown Techniques;Genes, Neoplasm;Glioblastoma;Glycolysis;Humans;Mice;Molecular Targeted Therapy;Phosphofructokinase-1;Survival Analysis;Up-Regulation	15.2898	17.3405	-5.36277	Proteomics	135
25866482	2015	Proteome science	Zhang, Peng;Guo, Zhengguang;Zhang, Yang;Gao, Zhixian;Ji, Nan;Wang, Danqi;Zou, Lili;Sun, Wei;Zhang, Liwei	A preliminary quantitative proteomic analysis of glioblastoma pseudoprogression.	BACKGROUNDS: Pseudoprogression disease (PsPD) is commonly observed during glioblastoma (GBM) follow-up after adjuvant therapy. Because it is difficult to differentiate PsPD from true early progression of GBM, we have used a quantitative proteomics strategy to identify molecular signatures and develop predictive markers of PsPD.RESULTS: An initial screening of three PsPD and three GBM patients was…	Journal Article	eng	PMC4393599	10.1186/s12953-015-0066-5		12.3992	12.2297	0.868071	Proteomics	135
25722303	2015	Molecular cancer research : MCR	Maachani, Uday Bhanu;Kramp, Tamalee;Hanson, Ryan;Zhao, Shuping;Celiku, Orieta;Shankavaram, Uma;Colombo, Riccardo;Caplen, Natasha J;Camphausen, Kevin;Tandle, Anita	Targeting MPS1 Enhances Radiosensitization of Human Glioblastoma by Modulating DNA Repair Proteins.	To ensure faithful chromosome segregation, cells use the spindle assembly checkpoint (SAC), which can be activated in aneuploid cancer cells. Targeting the components of SAC machinery required for the growth of aneuploid cells may offer a cancer cell-specific therapeutic approach. In this study, the effects of inhibiting Monopolar spindle 1, MPS1 (TTK), an essential SAC kinase, on the radiosensit…	Journal Article	eng	PMC4433451	10.1158/1541-7786.MCR-14-0462-T	Animals;Apoptosis;Brain Neoplasms;Cell Cycle Proteins;DNA Repair;Female;Glioblastoma;Humans;Mice, Nude;Protein-Serine-Threonine Kinases;Protein-Tyrosine Kinases;Radiation Tolerance;Random Allocation;Transfection;Xenograft Model Antitumor Assays	12.3629	16.6319	-5.95227	Proteomics	135
25558928	2015	ACS nano	Cohen, Zvi R;Ramishetti, Srinivas;Peshes-Yaloz, Naama;Goldsmith, Meir;Wohl, Anton;Zibly, Zion;Peer, Dan	Localized RNAi therapeutics of chemoresistant grade IV glioma using hyaluronan-grafted lipid-based nanoparticles.	Glioblastoma multiforme (GBM) is one of the most infiltrating, aggressive, and poorly treated brain tumors. Progress in genomics and proteomics has paved the way for identifying potential therapeutic targets for treating GBM, yet the vast majority of these leading drug candidates for the treatment of GBM are ineffective, mainly due to restricted passages across the blood-brain barrier. Nanopartic…	Journal Article	eng		10.1021/nn506248s	Animals;Biological Transport;Cell Cycle Proteins;Cell Death;Cell Line, Tumor;Cell Transformation, Neoplastic;Drug Carriers;Drug Resistance, Neoplasm;Gene Expression Regulation, Neoplastic;Gene Silencing;Glioblastoma;Humans;Hyaluronan Receptors;Hyaluronic Acid;Lipids;Mice;Mice, Inbred BALB C;Nanoparticles;Neoplasm Grading;Protein-Serine-Threonine Kinases;Proto-Oncogene Proteins;RNAi Therapeutics	14.2166	16.9133	-2.81291	Proteomics	135
25546404	2014	PloS one	Conroy, Siobhan;Kruyt, Frank A E;Joseph, Justin V;Balasubramaniyan, Veerakumar;Bhat, Krishna P;Wagemakers, Michiel;Enting, Roelien H;Walenkamp, Annemiek M E;den Dunnen, Wilfred F A	Subclassification of newly diagnosed glioblastomas through an immunohistochemical approach.	Molecular signatures in Glioblastoma (GBM) have been described that correlate with clinical outcome and response to therapy. The Proneural (PN) and Mesenchymal (MES) signatures have been identified most consistently, but others including Classical (CLAS) have also been reported. The molecular signatures have been detected by array techniques at RNA and DNA level, but these methods are costly and …	Journal Article	eng	PMC4278713	10.1371/journal.pone.0115687	Adult;Aged;Aged, 80 and over;Biomarkers, Tumor;ErbB Receptors;Female;Gene Expression Profiling;Glioblastoma;Humans;Immunohistochemistry;Male;Middle Aged;Transcriptome	12.3731	13.1784	4.10743	Proteomics	135
25419715	2014	PloS one	Jovčevska, Ivana;Zupanec, Neja;Kočevar, Nina;Cesselli, Daniela;Podergajs, Neža;Stokin, Clara Limbaeck;Myers, Michael P;Muyldermans, Serge;Ghassabeh, Gholamreza Hassanzadeh;Motaln, Helena;Ruaro, Maria Elisabetta;Bourkoula, Evgenia;Turnšek, Tamara Lah;Komel, Radovan	TRIM28 and β-actin identified via nanobody-based reverse proteomics approach as possible human glioblastoma biomarkers.	Malignant gliomas are among the rarest brain tumours, and they have the worst prognosis. Grade IV astrocytoma, known as glioblastoma multiforme (GBM), is a highly lethal disease where the standard therapies of surgery, followed by radiation and chemotherapy, cannot significantly prolong the life expectancy of the patients. Tumour recurrence shows more aggressive form compared to the primary tumou…	Journal Article	eng	PMC4242679	10.1371/journal.pone.0113688	Actins;Amino Acid Sequence;Animals;Antibody Affinity;Biomarkers, Tumor;Blotting, Western;Brain Neoplasms;Camelids, New World;Cell Line, Tumor;Glioblastoma;Humans;Male;Mass Spectrometry;Molecular Sequence Data;Neoplastic Stem Cells;Peptide Library;Proteomics;Repressor Proteins;Sequence Homology, Amino Acid;Single-Domain Antibodies;Tripartite Motif-Containing Protein 28	9.76657	17.377	-1.89907	Proteomics	135
25394324	2014	NMR in biomedicine	Hulsey, Keith M;Mashimo, Tomoyuki;Banerjee, Abhishek;Soesbe, Todd C;Spence, Jeffrey S;Vemireddy, Vamsidhara;Maher, Elizabeth A;Bachoo, Robert M;Choi, Changho	¹H MRS characterization of neurochemical profiles in orthotopic mouse models of human brain tumors.	Glioblastoma (GBM), the most common primary brain tumor, is resistant to currently available treatments. The development of mouse models of human GBM has provided a tool for studying mechanisms involved in tumor initiation and growth as well as a platform for preclinical investigation of new drugs. In this study we used (1) H MR spectroscopy to study the neurochemical profile of a human orthotopi…	Journal Article	eng		10.1002/nbm.3231	Animals;Brain Neoplasms;Disease Models, Animal;GABAergic Neurons;Glioblastoma;Glutamine;Humans;Metabolome;Mice;Proton Magnetic Resonance Spectroscopy	14.8896	19.8563	-2.41716	Proteomics	135
25378224	2014	Journal of cancer research and clinical oncology	Yan, Yong;Zhang, Lei;Jiang, Ying;Xu, Tao;Mei, Qiyong;Wang, Hongxiang;Qin, Rong;Zou, Yongxiang;Hu, Guohan;Chen, Juxiang;Lu, Yicheng	LncRNA and mRNA interaction study based on transcriptome profiles reveals potential core genes in the pathogenesis of human glioblastoma multiforme.	OBJECTIVES: To study the expression profiles of lncRNA and mRNA in glioblastoma multiforme (GBM) and to find potential core genes in the pathogenesis of this high malignant disease.METHODS: Agilent Microarray (Arrystar v2.0) was used to detect the expressions of 33,045 lncRNAs and 30,215 coding transcripts in 5 GBM and 5 normal brain samples. Differentially expressed lncRNAs and mRNAs were identi…	Journal Article	eng		10.1007/s00432-014-1861-6	Brain Neoplasms;Cluster Analysis;Gene Expression Profiling;Gene Expression Regulation, Neoplastic;Gene Regulatory Networks;Glioblastoma;Humans;Microarray Analysis;RNA, Long Noncoding;RNA, Messenger;Real-Time Polymerase Chain Reaction;Transcriptome	15.7275	13.3494	-0.309344	Proteomics	135
25368508	2014	Cancer informatics	Bozdag, Serdar;Li, Aiguo;Baysan, Mehmet;Fine, Howard A	Master regulators, regulatory networks, and pathways of glioblastoma subtypes.	Glioblastoma multiforme (GBM) is the most common malignant brain tumor. GBM samples are classified into subtypes based on their transcriptomic and epigenetic profiles. Despite numerous studies to better characterize GBM biology, a comprehensive study to identify GBM subtype- specific master regulators, gene regulatory networks, and pathways is missing. Here, we used FastMEDUSA to compute master r…	Journal Article	eng	PMC4214595	10.4137/CIN.S14027		17.8599	14.5578	0.418032	Proteomics	135
25356585	2014	PloS one	Verbovšek, Urška;Motaln, Helena;Rotter, Ana;Atai, Nadia A;Gruden, Kristina;Van Noorden, Cornelis J F;Lah, Tamara T	Expression analysis of all protease genes reveals cathepsin K to be overexpressed in glioblastoma.	BACKGROUND: Cancer genome and transcriptome analyses advanced our understanding of cancer biology. We performed transcriptome analysis of all known genes of peptidases also called proteases and their endogenous inhibitors in glioblastoma multiforme (GBM), which is one of the most aggressive and deadly types of brain cancers, where unbalanced proteolysis is associated with tumor progression.METHOD…	Journal Article	eng	PMC4214761	10.1371/journal.pone.0111819	Blotting, Western;Brain Neoplasms;Cathepsin K;Gene Expression Profiling;Gene Expression Regulation, Enzymologic;Gene Expression Regulation, Neoplastic;Genetic Association Studies;Glioblastoma;Humans;Immunohistochemistry;Protease Inhibitors;Real-Time Polymerase Chain Reaction;Reproducibility of Results;Signal Transduction;Up-Regulation	15.1264	14.2894	-0.807194	Proteomics	135
25114226	2014	Proceedings of the National Academy of Sciences of the United States of America	Gill, Brian J;Pisapia, David J;Malone, Hani R;Goldstein, Hannah;Lei, Liang;Sonabend, Adam;Yun, Jonathan;Samanamud, Jorge;Sims, Jennifer S;Banu, Matei;Dovas, Athanassios;Teich, Andrew F;Sheth, Sameer A;McKhann, Guy M;Sisti, Michael B;Bruce, Jeffrey N;Sims, Peter A;Canoll, Peter	MRI-localized biopsies reveal subtype-specific differences in molecular and cellular composition at the margins of glioblastoma.	Glioblastomas (GBMs) diffusely infiltrate the brain, making complete removal by surgical resection impossible. The mixture of neoplastic and nonneoplastic cells that remain after surgery form the biological context for adjuvant therapeutic intervention and recurrence. We performed RNA-sequencing (RNA-seq) and histological analysis on radiographically guided biopsies taken from different regions o…	Journal Article	eng	PMC4151734	10.1073/pnas.1405839111	Adult;Aged;Aged, 80 and over;Brain Neoplasms;Contrast Media;Female;Glioblastoma;Humans;Image-Guided Biopsy;Magnetic Resonance Imaging;Male;Middle Aged;RNA, Neoplasm;Sequence Analysis, RNA;Transcriptome;Tumor Microenvironment	14.569	13.2975	3.67876	Proteomics	135
24838487	2014	Journal of neuro-oncology	Deighton, Ruth F;Le Bihan, Thierry;Martin, Sarah F;Barrios-Llerena, Martin E;Gerth, Alice M J;Kerr, Lorraine E;McCulloch, James;Whittle, Ian R	The proteomic response in glioblastoma in young patients.	Increasing age is an important prognostic variable in glioblastoma (GBM). We have defined the proteomic response in GBM samples from 7 young patients (mean age 36 years) compared to peritumoural-control samples from 10 young patients (mean age 32 years). 2-Dimensional-gel-electrophoresis, image analysis, and protein identification (LC/MS) were performed. 68 proteins were significantly altered in …	Journal Article	eng	PMC4129242	10.1007/s11060-014-1474-6	Adult;Age Factors;Brain Neoplasms;Glioblastoma;Humans;Mass Spectrometry;Middle Aged;Mitochondria;Prognosis;Proteomics;Survival Rate	17.6229	14.224	-1.22918	Proteomics	135
24804210	2014	BioMed research international	Laffaire, Julien;Di Stefano, Anna Luisa;Chinot, Olivier;Idbaih, Ahmed;Gallego Perez-Larraya, Jaime;Marie, Yannick;Vintonenko, Nadia;Boisselier, Blandine;Farina, Patrizia;Delattre, Jean-Yves;Figarella-Branger, Dominique;Honnorat, Jérôme;Sanson, Marc;Ducray, François	An ANOCEF genomic and transcriptomic microarray study of the response to irinotecan and bevacizumab in recurrent glioblastomas.	BACKGROUND: We performed a retrospective study to assess whether the initial molecular characteristics of glioblastomas (GBMs) were associated with the response to the bevacizumab/irinotecan chemotherapy regimen given at recurrence.RESULTS: Comparison of the genomic and gene expression profiles of the responders (n = 12) and nonresponders (n = 13) demonstrated only slight differences and could no…	Journal Article	eng	PMC3996912	10.1155/2014/282815	Adult;Aged;Angiogenesis Inhibitors;Antibodies, Monoclonal, Humanized;Antineoplastic Agents, Phytogenic;Bevacizumab;Brain Neoplasms;Camptothecin;Female;Gene Expression Regulation, Neoplastic;Glioblastoma;Humans;Irinotecan;Male;Middle Aged;Neoplasm Recurrence, Local;Oligonucleotide Array Sequence Analysis;Retrospective Studies;Transcriptome	12.0682	15.4373	5.80581	Proteomics	135
24803679	2014	Physiological genomics	Heroux, Maxime S;Chesnik, Marla A;Halligan, Brian D;Al-Gizawiy, Mona;Connelly, Jennifer M;Mueller, Wade M;Rand, Scott D;Cochran, Elizabeth J;LaViolette, Peter S;Malkin, Mark G;Schmainda, Kathleen M;Mirza, Shama P	Comprehensive characterization of glioblastoma tumor tissues for biomarker identification using mass spectrometry-based label-free quantitative proteomics.	Cancer is a complex disease; glioblastoma (GBM) is no exception. Short survival, poor prognosis, and very limited treatment options make it imperative to unravel the disease pathophysiology. The critically important identification of proteins that mediate various cellular events during disease is made possible with advancements in mass spectrometry (MS)-based proteomics. The objective of our stud…	Journal Article	eng	PMC4587597	10.1152/physiolgenomics.00034.2014	Adult;Aged;Biomarkers, Tumor;Brain Neoplasms;Female;Glioblastoma;Humans;Male;Mass Spectrometry;Middle Aged;Proteomics;Staining and Labeling;Young Adult	12.086	12.6185	0.0466661	Proteomics	135
24747515	2014	PloS one	Wang, Xin;Liu, Tianzhu;Bai, Yifeng;Liao, Hongzhan;Qiu, Shengcong;Chang, Zhenhua;Liu, Yanting;Yan, Xiaohui;Guo, Hongbo	Polymerase I and transcript release factor acts as an essential modulator of glioblastoma chemoresistance.	OBJECTIVES: This study is to investigate if polymerase I and transcript release factor (PTRF) acts as a modulator in glioblastoma (GBM) chemoresistance.METHODS: Multidrug resistant (MDR) GBM cell line U251AR was established by exposing the U251 cell line to imatinib. The 2D-DIGE and MALDI-TOF/TOF-MS were performed on U251 and U251AR cell lines to screen MDR-related proteins. The expression of PTR…	Journal Article	eng	PMC3991573	10.1371/journal.pone.0093439	Benzamides;Caveolin 1;Cell Line, Tumor;Drug Resistance, Neoplasm;Gene Expression Regulation, Neoplastic;Gene Knockdown Techniques;Glioblastoma;Humans;Imatinib Mesylate;Piperazines;Proteomics;Pyrimidines;RNA-Binding Proteins;Recurrence	14.7382	14.4752	-1.90255	Proteomics	135
26207187	2014	Journal of membrane science &amp; technology	Banerjee, H N;Hyman, G;Evans, S;Manglik, V;Gwebu, E;Banerjee, A;Vaughan, D;Medley, J;Krauss, C;Wilkins, J;Smith, V;Banerji, A;Rousch, J	Identification of the Transmembrane Glucose Regulated Protein 78 as a Biomarker for the Brain Cancer Glioblastoma Multiforme by Gene Expression and Proteomic Studies.	The prognosis of patients with Glioblastoma Multiforme (GBM), the most malignant adult glial brain tumor, remains poor in spite of advances in treatment procedures, including surgical resection, irradiation and chemotherapy. Genetic heterogeneity of GBM warrants extensive studies to gain a thorough understanding of the biology of this tumor. While there have been several studies of global transcr…	Journal Article	eng	PMC4508859	10.4172/2155-9589.1000126		11.7976	13.8274	-0.500727	Proteomics	135
24440977	2014	Cancer biomarkers : section A of Disease markers	Su, Yanlin;Xiong, Jie;Bing, Zhitong;Zeng, Xiaomin;Zhang, Yong;Fu, Xiaohua;Peng, Xiaoning	Identification of novel human glioblastoma-specific transcripts by serial analysis of gene expression data mining.	BACKGROUND: Glioblastoma multiforme (GBM) remains the most common and aggressive primary brain tumor in adults with a poor median survival, and molecular biomarkers for GBM pathogenesis are in need.PURPOSE: The objective of this study is to identify potential novel genes for GBM pathogenesis by gene expression data mining.MATERIALS AND METHODS: Available SAGE libraries of GBM, astrocytoma, and no…	Journal Article	eng		10.3233/CBM-130367	Brain Neoplasms;Case-Control Studies;Data Mining;Gene Expression Profiling;Genes, Neoplasm;Glioblastoma;Humans;RNA, Messenger;Transcriptome	15.648	14.0899	-0.597779	Proteomics	135
24379381	2014	Proceedings of the National Academy of Sciences of the United States of America	Jaszberenyi, Miklos;Rick, Ferenc G;Popovics, Petra;Block, Norman L;Zarandi, Marta;Cai, Ren-Zhi;Vidaurre, Irving;Szalontay, Luca;Jayakumar, Arumugam R;Schally, Andrew V	Potentiation of cytotoxic chemotherapy by growth hormone-releasing hormone agonists.	The dismal prognosis of malignant brain tumors drives the development of new treatment modalities. In view of the multiple activities of growth hormone-releasing hormone (GHRH), we hypothesized that pretreatment with a GHRH agonist, JI-34, might increase the susceptibility of U-87 MG glioblastoma multiforme (GBM) cells to subsequent treatment with the cytotoxic drug, doxorubicin (DOX). This conce…	Journal Article	eng	PMC3896165	10.1073/pnas.1322622111	Animals;Cell Line, Tumor;Doxorubicin;Drug Synergism;Drug Therapy;Enzyme-Linked Immunosorbent Assay;Glial Fibrillary Acidic Protein;Glioblastoma;Growth Hormone-Releasing Hormone;Immunohistochemistry;Mice;Mice, Nude;Nerve Tissue Proteins;Nestin;Peptide Fragments;Real-Time Polymerase Chain Reaction	11.3634	16.5453	-5.89658	Proteomics	135
24114272	2013	Proceedings of the National Academy of Sciences of the United States of America	Song, Yurong;Zhang, Qian;Kutlu, Burak;Difilippantonio, Simone;Bash, Ryan;Gilbert, Debra;Yin, Chaoying;O'Sullivan, T Norene;Yang, Chunyu;Kozlov, Serguei;Bullitt, Elizabeth;McCarthy, Ken D;Kafri, Tal;Louis, David N;Miller, C Ryan;Hood, Leroy;Van Dyke, Terry	Evolutionary etiology of high-grade astrocytomas.	Glioblastoma (GBM), the most common brain malignancy, remains fatal with no effective treatment. Analyses of common aberrations in GBM suggest major regulatory pathways associated with disease etiology. However, 90% of GBMs are diagnosed at an advanced stage (primary GBMs), providing no access to early disease stages for assessing disease progression events. As such, both understanding of disease…	Journal Article	eng	PMC3816471	10.1073/pnas.1317026110	Animals;Astrocytoma;Base Sequence;Biological Evolution;Disease Models, Animal;Disease Progression;Gene Expression Profiling;Gene Regulatory Networks;Genetic Engineering;Glioblastoma;Mice;Mice, Transgenic;Microarray Analysis;Molecular Sequence Data;Mutation, Missense;PTEN Phosphohydrolase;Proto-Oncogene Proteins p21(ras);Sequence Analysis, DNA;Tumor Suppressor Protein p53	17.4785	16.6706	-1.16464	Proteomics	135
23875172	2013	Frontiers in oncology	Haskins, William E;Zablotsky, Bethany L;Foret, Michael R;Ihrie, Rebecca A;Alvarez-Buylla, Arturo;Eisenman, Robert N;Berger, Mitchel S;Lin, Chin-Hsing Annie	Molecular Characteristics in MRI-Classified Group 1 Glioblastoma Multiforme.	Glioblastoma multiforme (GBM) is a clinically and pathologically heterogeneous brain tumor. Previous studies of transcriptional profiling have revealed biologically relevant GBM subtypes associated with specific mutations and dysregulated pathways. Here, we applied a modified proteome to uncover abnormal protein expression profile in a MRI-classified group I GBM (GBM1), which has a spatial relati…	Journal Article	eng	PMC3708153	10.3389/fonc.2013.00182		12.9527	14.6421	0.350134	Proteomics	135
23592437	2013	Oncotarget	Freitas, Marcelo;Malheiros, Suzana;Stávale, João Norberto;Biassi, Thais Priscila;Zamunér, Fernando Tadeu;de Souza Begnami, Maria;Soares, Fernando Augusto;Vettore, Andre Luíz	Expression of cancer/testis antigens is correlated with improved survival in glioblastoma.	BACKGROUND: Glioblastoma (GBM) confers a dismal prognosis despite advances in current therapy. Cancer-testis antigens (CTA) comprise families of tumor-associated antigens that are immunogenic in different cancers. The aim of this study was to determine the expression profile of a large number of CTA genes in GBM.METHODS: We selected, from 153 CTA genes, those genes potentially expressed in GBM. T…	Journal Article	eng	PMC3720610	10.18632/oncotarget.950	Antigens, Neoplasm;Biomarkers, Tumor;Brain Neoplasms;Glioblastoma;Humans;Immunohistochemistry;Kaplan-Meier Estimate;Prognosis;Proportional Hazards Models;Reverse Transcriptase Polymerase Chain Reaction;Tissue Array Analysis;Transcriptome	16.1774	14.704	-1.10271	Proteomics	135
23483059	2013	Molecular bioSystems	Gupta, Manoj Kumar;Polisetty, Ravindra Varma;Ramamoorthy, Kalidoss;Tiwary, Shivani;Kaur, Navjot;Uppin, Megha S;Shiras, Anjali;Sirdeshmukh, Ravi	Secretome analysis of Glioblastoma cell line--HNGC-2.	Glioblastoma multiforme (GBM) is the most common and aggressive type of primary malignant tumor of the central nervous system. We have carried out a deep analysis of the secretome of a rapidly proliferating and tumorigenic cell line HNGC-2, representing GBM, in an effort to identify proteins, which may be targeted in the plasma of GBM patients as markers for diagnosis and disease surveillance. Pr…	Journal Article	eng		10.1039/c3mb25383j	Actin Cytoskeleton;Cell Line, Tumor;Chromatography, Liquid;Gene Expression Profiling;Glioblastoma;Humans;Neoplasm Proteins;Phosphatidylinositol 3-Kinase;Protein-Serine-Threonine Kinases;Signal Transduction;Tandem Mass Spectrometry;Transcriptome	10.7279	12.2159	0.016277	Proteomics	135
23224339	2012	Archivum immunologiae et therapiae experimentalis	Agnihotri, Sameer;Burrell, Kelly E;Wolf, Amparo;Jalali, Sharzhad;Hawkins, Cynthia;Rutka, James T;Zadeh, Gelareh	Glioblastoma, a brief review of history, molecular genetics, animal models and novel therapeutic strategies.	Glioblastoma (GBM) is the most common and lethal primary brain tumor. Over the past few years tremendous genomic and proteomic characterization along with robust animal models of GBM have provided invaluable data that show that &quot;GBM&quot;, although histologically indistinguishable from one another, are comprised of molecularly heterogenous diseases. In addition, robust pre-clinical models an…	Journal Article	eng		10.1007/s00005-012-0203-0	Animals;Brain Neoplasms;Disease Models, Animal;Glioblastoma;History, 20th Century;History, 21st Century;Humans;Molecular Targeted Therapy;Neoplasm Invasiveness;Proteomics	17.0228	16.1032	-3.77056	Proteomics	135
22747609	2012	Cancer science	Motomura, Kazuya;Natsume, Atsushi;Watanabe, Reiko;Ito, Ichiro;Kato, Yukinari;Momota, Hiroyuki;Nishikawa, Ryo;Mishima, Kazuhiko;Nakasu, Yoko;Abe, Tatsuya;Namba, Hiroki;Nakazato, Yoichi;Tashiro, Hiroshi;Takeuchi, Ichiro;Mori, Tsutomu;Wakabayashi, Toshihiko	Immunohistochemical analysis-based proteomic subclassification of newly diagnosed glioblastomas.	Recent gene expression and copy number profilings of glioblastoma multiforme (GBM) by The Cancer Genome Atlas (TCGA) Research Network suggest the existence of distinct subtypes of this tumor. However, these approaches might not be easily applicable in routine clinical practice. In the current study, we aimed to establish a proteomics-based subclassification of GBM by integrating their genomic and…	Journal Article	eng		10.1111/j.1349-7006.2012.02377.x	Adolescent;Adult;Aged;Aged, 80 and over;Brain Neoplasms;Cluster Analysis;Female;Gene Expression Profiling;Glioblastoma;Humans;Immunohistochemistry;Male;Middle Aged;Multiplex Polymerase Chain Reaction;Proteomics;Transcriptome;Young Adult	12.8909	13.9458	3.61266	Proteomics	135
22736234	2012	Brain tumor pathology	Mizoguchi, Masahiro;Yoshimoto, Koji;Ma, Xinlong;Guan, Yanlei;Hata, Nobuhiro;Amano, Toshiyuki;Nakamizo, Akira;Suzuki, Satoshi O;Iwaki, Toru;Sasaki, Tomio	Molecular characteristics of glioblastoma with 1p/19q co-deletion.	Recent developments in molecular analysis have revealed genetic alterations in human gliomas. Loss of heterozygosity (LOH) is a critical molecular marker for classification of human glioma, and is useful for predicting outcome. Our previous LOH study identified a small subgroup of glioblastoma (GBM), with 1p/19q co-deletion, with a favorable clinical outcome. In this study, we investigated molecu…	Journal Article	eng		10.1007/s10014-012-0107-z	Basic Helix-Loop-Helix Transcription Factors;Brain Neoplasms;Chromosomes, Human, Pair 1;Chromosomes, Human, Pair 19;ErbB Receptors;Gene Deletion;Glioblastoma;Humans;Isocitrate Dehydrogenase;Loss of Heterozygosity;Nerve Tissue Proteins;Oligodendrocyte Transcription Factor 2;Real-Time Polymerase Chain Reaction;Transcriptome	15.1287	14.9087	6.09518	Proteomics	135
22684992	2012	Proteomics	Gollapalli, Kishore;Ray, Sandipan;Srivastava, Rajneesh;Renu, Durairaj;Singh, Prateek;Dhali, Snigdha;Bajpai Dikshit, Jyoti;Srikanth, Rapole;Moiyadi, Aliasgar;Srivastava, Sanjeeva	Investigation of serum proteome alterations in human glioblastoma multiforme.	Glioblastoma multiforme (GBM) or grade IV astrocytoma is the most common and lethal adult malignant brain tumor. The present study was conducted to investigate the alterations in the serum proteome in GBM patients compared to healthy controls. Comparative proteomic analysis was performed employing classical 2DE and 2D-DIGE combined with MALDI TOF/TOF MS and results were further validated through …	Journal Article	eng		10.1002/pmic.201200002	Bayes Theorem;Biomarkers, Tumor;Blood Proteins;Case-Control Studies;Decision Trees;Down-Regulation;Electrophoresis, Gel, Two-Dimensional;Glioblastoma;Humans;Multivariate Analysis;Peptide Fragments;Protein Interaction Maps;Proteome;Proteomics;Reproducibility of Results;Signal Transduction;Spectrometry, Mass, Matrix-Assisted Laser Desorption-Ionization;Up-Regulation	11.4882	12.0621	-2.04775	Proteomics	135
22219345	2012	Molecular &amp; cellular proteomics : MCP	Polisetty, Ravindra Varma;Gautam, Poonam;Sharma, Rakesh;Harsha, H C;Nair, Sudha C;Gupta, Manoj Kumar;Uppin, Megha S;Challa, Sundaram;Puligopu, Aneel Kumar;Ankathi, Praveen;Purohit, Aniruddh K;Chandak, Giriraj R;Pandey, Akhilesh;Sirdeshmukh, Ravi	LC-MS/MS analysis of differentially expressed glioblastoma membrane proteome reveals altered calcium signaling and other protein groups of regulatory functions.	Membrane proteins play key roles in the development and progression of cancer. We have studied differentially expressed membrane proteins in glioblastoma multiforme (GBM), the most common and aggressive type of primary brain tumor, by high resolution LC-MS/MS mass spectrometry and quantitation by iTRAQ. A total of 1834 membrane proteins were identified with high confidence, of which 356 proteins …	Journal Article	eng	PMC3433906	10.1074/mcp.M111.013565	Amino Acid Sequence;Brain Neoplasms;Calcium Signaling;Case-Control Studies;Chromatography, Liquid;Female;Gene Expression Regulation, Neoplastic;Glioblastoma;Humans;Male;Membrane Proteins;Middle Aged;Molecular Sequence Data;Peptide Fragments;Proteome;Tandem Mass Spectrometry;Tissue Array Analysis	11.2995	11.3777	0.195024	Proteomics	135
21863242	2011	Acta neuropathologica	Svendsen, Agnete;Verhoeff, Joost J C;Immervoll, Heike;Brøgger, Jan C;Kmiecik, Justyna;Poli, Aurelie;Netland, Inger A;Prestegarden, Lars;Planagumà, Jesús;Torsvik, Anja;Kjersem, Anneli Bohne;Sakariassen, Per Ø;Heggdal, Jan I;Van Furth, Wouter R;Bjerkvig, Rolf;Lund-Johansen, Morten;Enger, Per Ø;Felsberg, Joerg;Brons, Nicolaas H C;Tronstad, Karl J;Waha, Andreas;Chekenya, Martha	Expression of the progenitor marker NG2/CSPG4 predicts poor survival and resistance to ionising radiation in glioblastoma.	Glioblastoma (GBM) is a highly aggressive brain tumour, where patients respond poorly to radiotherapy and exhibit dismal survival outcomes. The mechanisms of radioresistance are not completely understood. However, cancer cells with an immature stem-like phenotype are hypothesised to play a role in radioresistance. Since the progenitor marker neuron-glial-2 (NG2) has been shown to regulate several…	Journal Article	eng	PMC3185228	10.1007/s00401-011-0867-2	Aged;Antigens;Biomarkers, Tumor;Brain Neoplasms;DNA Damage;Female;Glioblastoma;Humans;Male;Middle Aged;Predictive Value of Tests;Prognosis;Proteoglycans;Radiation Tolerance;Radiation, Ionizing;Stem Cells;Survival Rate	10.3385	18.0481	-2.23681	Proteomics	135
21601021	2011	Journal of proteomics	Polisetty, Ravindra V;Gupta, Manoj Kumar;Nair, Sudha C;Ramamoorthy, Kalidoss;Tiwary, Shivani;Shiras, Anjali;Chandak, Giriraj R;Sirdeshmukh, Ravi	Glioblastoma cell secretome: analysis of three glioblastoma cell lines reveal 148 non-redundant proteins.	Glioblastoma multiforme (GBM) is the most aggressive among human gliomas with poor prognosis. Study of tumor cell secretome - proteins secreted by cancer cell lines, is a powerful approach to discover potential diagnostic or prognostic biomarkers. Here we report, for the first time, proteins secreted by three GBM cell lines, HNGC2, LN229 and U87MG. Analysis of the conditioned media of these cell …	Journal Article	eng		10.1016/j.jprot.2011.05.002	Cell Line, Tumor;Gene Expression Profiling;Glioblastoma;Humans;Neoplasm Proteins;Spectrometry, Mass, Electrospray Ionization	10.6287	12.2798	0.0149238	Proteomics	135
20837658	2010	Genes &amp; development	Stegh, Alexander H;Brennan, Cameron;Mahoney, John A;Forloney, Kristin L;Jenq, Harry T;Luciano, Janina P;Protopopov, Alexei;Chin, Lynda;Depinho, Ronald A	Glioma oncoprotein Bcl2L12 inhibits the p53 tumor suppressor.	Glioblastoma multiforme (GBM) is a lethal brain tumor characterized by intense apoptosis resistance and extensive necrosis. Bcl2L12 (for Bcl2-like 12) is a cytoplasmic and nuclear protein that is overexpressed in primary GBM and functions to inhibit post-mitochondrial apoptosis signaling. Here, we show that nuclear Bcl2L12 physically and functionally interacts with the p53 tumor suppressor, as ev…	Journal Article	eng	PMC2947771	10.1101/gad.1924710	Animals;Apoptosis;Cell Line;Cells, Cultured;Cellular Senescence;DNA Damage;Gene Expression Regulation;Glioma;Humans;Mice;Promoter Regions, Genetic;Protein Binding;Protein Stability;Protein Transport;Proto-Oncogene Proteins c-bcl-2;Signal Transduction;Tumor Suppressor Protein p53	13.1574	14.9638	-5.23457	Proteomics	135
20822092	2010	Journal of proteome research	Kumar, Durairaj Mohan;Thota, Balaram;Shinde, Sridevi Vijay;Prasanna, K V;Hegde, A S;Arivazhagan, A;Chandramouli, B A;Santosh, Vani;Somasundaram, Kumaravel	Proteomic identification of haptoglobin α2 as a glioblastoma serum biomarker: implications in cancer cell migration and tumor growth.	Glioblastoma (GBM; grade IV astrocytoma) is the most malignant and common primary brain tumor in adults. Using combination of 2-DE and MALDI-TOF MS, we analyzed 14 GBM and 6 normal control sera and identified haptoglobin α2 chain as an up-regulated serum protein in GBM patients. GBM-specific up-regulation was confirmed by ELISA based quantitation of haptoglobin (Hp) in the serum of 99 GBM patient…	Journal Article	eng		10.1021/pr1001737	Animals;Astrocytes;Biomarkers, Tumor;Case-Control Studies;Cell Line, Tumor;Cell Movement;Cell Proliferation;Glioblastoma;Haptoglobins;Humans;Melanoma;Mice;Proteomics;Up-Regulation	11.5358	11.8809	-2.44024	Proteomics	135
20806975	2010	Journal of proteome research	de Saldanha da Gama Fischer, Juliana;Costa Carvalho, Paulo;da Fonseca, Clovis Orlando;Liao, Lujian;Degrave, Wim M;da Gloria da Costa Carvalho, Maria;Yates, John R;Domont, Gilberto B	Chemo-resistant protein expression pattern of glioblastoma cells (A172) to perillyl alcohol.	Glioblastoma multiform (GBM) is by far the most malignant glioma. We have introduced a new treatment for GBMs that comprises the inhalation of a naturally occurring terpene with chemotherapeutic properties known as perillyl alcohol (POH). Clinical trial results on recurrent GBM patients showed that POH extends the average life by more than eight months, temporarily slows tumor growth, and in some…	Journal Article	eng	PMC3017632	10.1021/pr100677g	Antineoplastic Agents;Blotting, Western;Brain;Cell Line, Tumor;Clinical Trials as Topic;Drug Resistance, Neoplasm;Electrophoresis, Gel, Two-Dimensional;Glioblastoma;Humans;Magnetic Resonance Imaging;Monoterpenes;Peptide Fragments;Proteome;Proteomics;Reproducibility of Results;Spectrometry, Mass, Matrix-Assisted Laser Desorption-Ionization	12.324	16.1285	-2.03638	Proteomics	135
20617365	2010	Journal of neuro-oncology	Elstner, Anja;Stockhammer, Florian;Nguyen-Dobinsky, Trong-Nghia;Nguyen, Quang Long;Pilgermann, Ingo;Gill, Amanjit;Guhr, Anke;Zhang, Tingguo;von Eckardstein, Kajetan;Picht, Thomas;Veelken, Julian;Martuza, Robert L;von Deimling, Andreas;Kurtz, Andreas	Identification of diagnostic serum protein profiles of glioblastoma patients.	Diagnosis of a glioblastoma (GBM) is triggered by the onset of symptoms and is based on cerebral imaging and histological examination. Serum-based biomarkers may support detection of GBM. Here, we explored serum protein concentrations of GBM patients and used data mining to explore profiles of biomarkers and determine whether these are associated with the clinical status of the patients. Gene and…	Journal Article	eng	PMC3094565	10.1007/s11060-010-0284-8	Adult;Aged;Biomarkers, Tumor;Blood Proteins;Brain;Brain Neoplasms;Case-Control Studies;Female;Glioblastoma;Humans;Immunoenzyme Techniques;Magnetic Resonance Imaging;Male;Middle Aged;Prognosis;Proteomics;Survival Rate;Young Adult	11.3818	12.0655	-2.17218	Proteomics	135
20043719	2010	Neurosurgical focus	Thaker, Nikhil G;Zhang, Fang;McDonald, Peter R;Shun, Tong Ying;Lazo, John S;Pollack, Ian F	Functional genomic analysis of glioblastoma multiforme through short interfering RNA screening: a paradigm for therapeutic development.	Glioblastoma multiforme (GBM) is a high-grade brain malignancy arising from astrocytes. Despite aggressive surgical approaches, optimized radiation therapy regimens, and the application of cytotoxic chemotherapies, the median survival of patients with GBM from time of diagnosis remains less than 15 months, having changed little in decades. Approaches that target genes and biological pathways resp…	Journal Article	eng		10.3171/2009.10.FOCUS09210	Brain Neoplasms;Cell Death;Cell Line, Tumor;Cell Survival;Drug Discovery;Gene Expression Regulation, Neoplastic;Genetic Testing;Genome-Wide Association Study;Genomics;Glioblastoma;Humans;Models, Genetic;Pharmacogenetics;Protein Interaction Mapping;Proteomics;RNA, Small Interfering	13.154	17.9679	0.904901	Proteomics	135
19684614	2009	Oncogene	Bagci, T;Wu, J K;Pfannl, R;Ilag, L L;Jay, D G	Autocrine semaphorin 3A signaling promotes glioblastoma dispersal.	Glioblastoma multiforme (GBM) is the most malignant glioma type with diffuse borders due to extensive tumor cell infiltration. Therefore, understanding the mechanism of GBM cell dispersal is critical for developing effective therapies to limit infiltration. We identified neuropilin-1 as a mediator of cancer cell invasion by a functional proteomic screen and showed its role in GBM cells. Neuropili…	Journal Article	eng		10.1038/onc.2009.204	Autocrine Communication;Brain Chemistry;Brain Neoplasms;Cell Adhesion;Cell Line, Tumor;Cell Movement;Glioblastoma;Humans;Neoplasm Invasiveness;Neuropilin-1;Proteomics;Semaphorin-3A;rac1 GTP-Binding Protein	16.6412	13.7743	-5.63281	Proteomics	135
18669646	2008	Proceedings of the National Academy of Sciences of the United States of America	Stegh, Alexander H;Kesari, Santosh;Mahoney, John E;Jenq, Harry T;Forloney, Kristin L;Protopopov, Alexei;Louis, David N;Chin, Lynda;DePinho, Ronald A	Bcl2L12-mediated inhibition of effector caspase-3 and caspase-7 via distinct mechanisms in glioblastoma.	Glioblastoma multiforme (GBM) is a highly aggressive brain cancer that is characterized by the paradoxical features of intense apoptosis resistance yet a marked propensity to undergo necrosis. Bcl2L12 (for Bcl2-Like12) is a nuclear and cytoplasmic oncoprotein that is universally overexpressed in primary GBM and functions to block postmitochondrial apoptosis signaling by neutralizing effector casp…	Journal Article	eng	PMC2504776	10.1073/pnas.0712034105	Apoptosis;Astrocytes;Blotting, Western;Caspase 3;Caspase 7;DNA Fragmentation;Gene Expression Profiling;Glioblastoma;Humans;Muscle Proteins;Proto-Oncogene Proteins c-bcl-2;RNA Interference;RNA, Small Interfering;alpha-Crystallin B Chain	12.2719	14.5126	-5.78523	Proteomics	135
18182627	2008	Neuro-oncology	Li, Jie;Yin, Chunyue;Okamoto, Hiroaki;Mushlin, Harry;Balgley, Brian M;Lee, Cheng S;Yuan, Kristy;Ikejiri, Barbara;Glasker, Sven;Vortmeyer, Alexander O;Oldfield, Edward H;Weil, Robert J;Zhuang, Zhengping	Identification of a novel proliferation-related protein, WHSC1 4a, in human gliomas.	Dynamic changes in the expression of multiple genes appear to be common features that distinguish transformed cells from their normal counterparts. We compared the proteomic profiles of four glioblastoma multiforme (GBM) tissue samples and four normal brain cortex samples to examine the molecular basis of gliomagenesis. Trypsin-digested protein samples were separated by capillary isoelectric focu…	Journal Article	eng	PMC2600837	10.1215/15228517-2007-036	Blotting, Western;Brain Neoplasms;Cell Proliferation;Chromatography, Liquid;Glioma;Histone-Lysine N-Methyltransferase;Humans;Immunohistochemistry;Proteomics;RNA, Small Interfering;Repressor Proteins;Reverse Transcriptase Polymerase Chain Reaction;Tandem Mass Spectrometry;Transfection	11.8371	12.8568	-0.6266	Proteomics	135
17127728	2006	Annals of clinical and laboratory science	Brown, Robert E;Law, Amy	Morphoproteomic demonstration of constitutive nuclear factor-kappaB activation in glioblastoma multiforme with genomic correlates and therapeutic implications.	Glioblastoma multiforme (GBM) presents a major challenge to neurosurgeons, neuro-oncologists, and radiation therapists by virtue of its location with a blood-brain barrier, chemoradioresistance, highly malignant phenotype, and angiogenic potential. Because nuclear factor-kappaB (NF-kappaB) can transcriptionally activate genes leading to the synthesis of anti-apoptotic, chemoresistant, growth prom…	Journal Article	eng			Adult;Aged;Brain Neoplasms;Cell Nucleus;DNA;Female;Gene Expression Regulation;Glioblastoma;Humans;Male;Middle Aged;NF-kappa B;Phosphorylation;Proteomics;Translocation, Genetic	13.2315	15.5463	-4.34336	Proteomics	135
15897557	2005	Clinical cancer research : an official journal of the American Association for Cancer Research	Vogel, Timothy W;Zhuang, Zhengping;Li, Jie;Okamoto, Hiroaki;Furuta, Makoto;Lee, Youn-Soo;Zeng, Weifen;Oldfield, Edward H;Vortmeyer, Alexander O;Weil, Robert J	Proteins and protein pattern differences between glioma cell lines and glioblastoma multiforme.	INTRODUCTION: Research into the pathogenesis, molecular signaling, and treatment of glioblastoma multiforme (GBM) has traditionally been conducted using cell lines derived from malignant gliomas. We compared protein expression patterns between solid primary GBMs and GBM cell lines to identify proteins whose expression may be altered in cell culture.METHODS: We cultured cell lines U87, U118, U251,…	Journal Article	eng		10.1158/1078-0432.CCR-04-2115	Brain Neoplasms;Electrophoresis, Gel, Two-Dimensional;Gene Expression Profiling;Glioblastoma;Glioma;Proteomics;Reproducibility of Results;Selection, Genetic;Tumor Cells, Cultured	13.8979	13.1971	-0.967561	Proteomics	135
15286718	2004	Oncogene	Furuta, Makoto;Weil, Robert J;Vortmeyer, Alexander O;Huang, Steve;Lei, Jingqi;Huang, Tai-Nan;Lee, Youn-Soo;Bhowmick, Deb A;Lubensky, Irina A;Oldfield, Edward H;Zhuang, Zhengping	Protein patterns and proteins that identify subtypes of glioblastoma multiforme.	Glioblastoma multiforme (GBM) has been subdivided into two types based on clinical and genetic findings: primary tumors, which arise de novo, and secondary tumors, which progress from lower grade gliomas to GBMs. To analyse this dichotomy at the protein level, we employed selective tissue microdissection to obtain pure populations of tumor cells, which we studied using two-dimensional protein gel…	Journal Article	eng		10.1038/sj.onc.1207770	Base Sequence;DNA Primers;Electrophoresis, Gel, Two-Dimensional;Glioblastoma;Humans;Mutation;Neoplasm Proteins;Neoplasms, Second Primary;PTEN Phosphohydrolase;Phosphoric Monoester Hydrolases;Polymerase Chain Reaction;Tumor Suppressor Protein p53;Tumor Suppressor Proteins	12.8157	13.2234	-0.459432	Proteomics	135
31969991	2020	NPJ vaccines	Erhart, Friedrich;Hackl, Matthias;Hahne, Hannes;Buchroithner, Johanna;Meng, Chen;Klingenbrunner, Simone;Reitermaier, René;Fischhuber, Katrin;Skalicky, Susanna;Berger, Walter;Spiegl-Kreinecker, Sabine;Lötsch, Daniela;Ricken, Gerda;Kuster, Bernhard;Wöhrer, Adelheid;Widhalm, Georg;Hainfellner, Johannes;Felzmann, Thomas;Dohnal, Alexander M;Marosi, Christine;Visus, Carmen	Combined proteomics/miRNomics of dendritic cell immunotherapy-treated glioblastoma patients as a screening for survival-associated factors.	Glioblastoma is the most prevalent and aggressive brain cancer. With a median overall survival of ~15-20 months under standard therapy, novel treatment approaches are desperately needed. A recent phase II clinical trial with a personalized immunotherapy based on tumor lysate-charged dendritic cell (DC) vaccination, however, failed to prolong survival. Here, we investigated tumor tissue from trial…	Journal Article	eng	PMC6965118	10.1038/s41541-019-0149-x		32.687	1.03151	-1.94737	Epigenomic cell regulation	105
31941933	2020	Scientific reports	Calhoun, Mark A;Cui, Yixiao;Elliott, Eileen E;Mo, Xiaokui;Otero, Jose J;Winter, Jessica O	MicroRNA-mRNA Interactions at Low Levels of Compressive Solid Stress Implicate mir-548 in Increased Glioblastoma Cell Motility.	Glioblastoma (GBM) is an astrocytic brain tumor with median survival times of &lt;15 months, primarily as a result of high infiltrative potential and development of resistance to therapy (i.e., surgical resection, chemoradiotherapy). A prominent feature of the GBM microenvironment is compressive solid stress (CSS) caused by uninhibited tumor growth within the confined skull. Here, we utilized a m…	Journal Article	eng	PMC6962377	10.1038/s41598-019-56983-x		33.6394	0.69136	-1.88847	Epigenomic cell regulation	105
31783691	2019	Cancers	Liu, Heng-Wei;Lee, Peter Mingjui;Bamodu, Oluwaseun Adebayo;Su, Yu-Kai;Fong, Iat-Hang;Yeh, Chi-Tai;Chien, Ming-Hsien;Kan, I-Hung;Lin, Chien-Min	Enhanced Hsa-miR-181d/p-STAT3 and Hsa-miR-181d/p-STAT5A Ratios Mediate the Anticancer Effect of Garcinol in STAT3/5A-Addicted Glioblastoma.	CONCLUSIONS: We present evidence of anti-GBM efficacy of garcinol mediated by enhancing the hsa-miR-181d/STAT3 and hsa-miR-181d/5A ratios in GBM cells. Our findings suggest a potential new therapeutic agent for combating aggressive GBM.	Journal Article	eng	PMC6966688	10.3390/cancers11121888		40.019	1.26688	-4.09776	Epigenomic cell regulation	105
31695788	2019	Theranostics	Lin, Xian;Zuo, Shi;Luo, Rongcheng;Li, Yonghao;Yu, Guifang;Zou, Yujiao;Zhou, Yan;Liu, Zhan;Liu, Yiyi;Hu, Yingying;Xie, Yingying;Fang, Weiyi;Liu, Zhen	HBX-induced miR-5188 impairs FOXO1 to stimulate β-catenin nuclear translocation and promotes tumor stemness in hepatocellular carcinoma.	Cancer stem cells (CSCs) are the key factor in determining cancer recurrence, metastasis, chemoresistance and patient prognosis in hepatocellular carcinoma (HCC). The role of miR-5188 in cancer stemness has never been documented. In this study, we investigated the clinical and biological roles of miR-5188 in HCC. Methods: MiRNA expression in HCC was analyzed by bioinformatics analysis and in situ…	Journal Article	eng	PMC6831466	10.7150/thno.37717		37.9184	1.29569	-3.85774	Epigenomic cell regulation	105
31511040	2019	Journal of experimental &amp; clinical cancer research : CR	Chen, Jiansheng;Chen, Taoliang;Zhu, Yubo;Li, Yan;Zhang, Yuxuan;Wang, Yun;Li, Xiao;Xie, Xiaomi;Wang, Jihui;Huang, Min;Sun, Xinlin;Ke, Yiquan	circPTN sponges miR-145-5p/miR-330-5p to promote proliferation and stemness in glioma.	BACKGROUND: Growing evidences indicate that circular RNAs (circRNAs) play an important role in the regulation of biological behavior of tumor. We aim to explore the role of circRNA in glioma and elucidate how circRNA acts.METHODS: Real-time PCR was used to examine the expression of circPTN in glioma tissues and normal brain tissues (NBT). Assays of dual- luciferase reporter system, biotin label R…	Journal Article	eng	PMC6737709	10.1186/s13046-019-1376-8	3' Untranslated Regions;Animals;Brain Neoplasms;Cell Cycle;Cell Line, Tumor;Cell Movement;Disease Models, Animal;Gene Expression Profiling;Glioma;Heterografts;Humans;Mice;MicroRNAs;RNA, Circular;Transcriptome	38.1944	1.4709	-2.90819	Epigenomic cell regulation	105
31419987	2019	Journal of experimental &amp; clinical cancer research : CR	Liu, Qiang;Guan, Yanlei;Li, Zhenhang;Wang, Yao;Liu, Yu;Cui, Run;Wang, Yunjie	miR-504 suppresses mesenchymal phenotype of glioblastoma by directly targeting the FZD7-mediated Wnt-β-catenin pathway.	BACKGROUND: MicroRNAs (miRNAs) play crucial roles in tumor initiation and development. Previously, we indicated that miR-504 is downregulated and suppresses tumor proliferation in glioblastoma (GBM). However, the regulation and relevant mechanism of miR-504 in GBM mesenchymal (ME) transition remain unclear.METHODS: Transcriptome and clinical data were obtained from The Cancer Genome Atlas (TCGA) …	Journal Article	eng	PMC6697940	10.1186/s13046-019-1370-1	Animals;Apoptosis;Biomarkers, Tumor;Brain Neoplasms;Cell Proliferation;Cohort Studies;Epithelial-Mesenchymal Transition;Female;Follow-Up Studies;Frizzled Receptors;Gene Expression Regulation, Neoplastic;Glioblastoma;Humans;Male;Mice;Mice, Inbred BALB C;Mice, Nude;MicroRNAs;Middle Aged;Prognosis;Survival Rate;Tumor Cells, Cultured;Wnt Proteins;Xenograft Model Antitumor Assays;beta Catenin	37.0958	2.25642	-3.88432	Epigenomic cell regulation	105
31391849	2019	International journal of endocrinology	Zhao, Sida;Li, Jianhua;Feng, Jie;Li, Zhenye;Liu, Qian;Lv, Peng;Wang, Fei;Gao, Hua;Zhang, Yazhuo	Identification of Serum miRNA-423-5p Expression Signature in Somatotroph Adenomas.	Circulating miRNAs are novel disease biomarkers that are valuable for diagnosis and prognosis. But the circulating miRNAs profile in somatotroph adenomas is still unknown. Therefore, serum exosomal miRNAs expression profiling in somatotroph adenomas was performed on 6 somatotroph adenomas and 6 normal controls. From the exosomal miRNAs expression profiling, we found 169 miRNAs differently express…	Journal Article	eng	PMC6662485	10.1155/2019/8516858		33.337	-2.25019	-10.6643	Epigenomic cell regulation	105
31340158	2019	Cell reports	Kobayashi, Mariko;Benakis, Corinne;Anderson, Corey;Moore, Michael J;Poon, Carrie;Uekawa, Ken;Dyke, Jonathan P;Fak, John J;Mele, Aldo;Park, Christopher Y;Zhou, Ping;Anrather, Josef;Iadecola, Costantino;Darnell, Robert B	AGO CLIP Reveals an Activated Network for Acute Regulation of Brain Glutamate Homeostasis in Ischemic Stroke.	Post-transcriptional regulation by microRNAs (miRNAs) is essential for complex molecular responses to physiological insult and disease. Although many disease-associated miRNAs are known, their global targets and culminating network effects on pathophysiology remain poorly understood. We applied Argonaute (AGO) crosslinking immunoprecipitation (CLIP) to systematically elucidate altered miRNA-targe…	Journal Article	eng	PMC6784548	10.1016/j.celrep.2019.06.075		31.6077	-0.187121	-7.53549	Epigenomic cell regulation	105
31304776	2019	Epigenomics	Lu, Yaoyong;Deng, Xubin;Xiao, Guanghui;Zheng, Xin;Ma, Lei;Huang, Wendong	circ_0001730 promotes proliferation and invasion via the miR-326/Wnt7B axis in glioma cells.	Aim: To study the role of circRNA (circ_0001730) in glioblastoma. Materials & methods: The interaction between circ_0001730 and miR-326 was confirmed by FISH, RNA pull down, RNA-binding protein immunoprecipitation and luciferase reporter assays. Cell proliferation and growth were determined by MTT, EdU and colony formation assays. Cell migration was assessed by the Boyden assay. Results: The leve…	Journal Article	eng		10.2217/epi-2019-0121		37.5661	2.671	-2.91942	Epigenomic cell regulation	105
31270041	2019	Nan fang yi ke da xue xue bao = Journal of Southern Medical University	Peng, Shuxian;Li, Xun;Liu, Qin;Zhang, Yingheng;Zou, Liming;Gong, Xiaoli;Wang, Miaomiao;Ma, Xiaodong	[Identification of differentially expressed genes between lung adenocarcinoma and squamous cell carcinoma using transcriber signature analysis].	OBJECTIVE: To analyze the differentially expressed genes (DEGs) between lung adenocarcinoma (LUAD) and lung squamous cell carcinoma (LUSC) with bioinformatics analysis and search for potential biomarkers for clinical diagnosis of nonsmall cell lung cancer (NSCLC).RESULTS: GEO data analysis identified 851 DEGs (including 276 up-regulated and 575 down-regulated genes) in LUAD and 885 DEGs (includin…	Journal Article	chi	PMC6743921	10.12122/j.issn.1673-4254.2019.06.03	Adenocarcinoma of Lung;Carcinoma, Non-Small-Cell Lung;Carcinoma, Squamous Cell;Humans;Lung Neoplasms;MicroRNAs;Y-Box-Binding Protein 1	36.042	0.762879	-2.5002	Epigenomic cell regulation	105
31170943	2019	BMC cancer	Zakrzewska, Magdalena;Gruszka, Renata;Stawiski, Konrad;Fendler, Wojciech;Kordacka, Joanna;Grajkowska, Wiesława;Daszkiewicz, Paweł;Liberski, Paweł P;Zakrzewski, Krzysztof	Expression-based decision tree model reveals distinct microRNA expression pattern in pediatric neuronal and mixed neuronal-glial tumors.	BACKGROUND: The understanding of the molecular biology of pediatric neuronal and mixed neuronal-glial brain tumors is still insufficient due to low frequency and heterogeneity of those lesions which comprise several subtypes presenting neuronal and/or neuronal-glial differentiation. Important is that the most frequent ganglioglioma (GG) and dysembryoplastic neuroepithelial tumor (DNET) showed lim…	Journal Article	eng	PMC6555720	10.1186/s12885-019-5739-5	Adolescent;Astrocytoma;Brain Neoplasms;Child;Child, Preschool;Decision Trees;Female;Ganglioglioma;Humans;Infant;Male;MicroRNAs;Microarray Analysis;Prospective Studies;ROC Curve;Transcriptome	32.2924	0.0933301	-7.16534	Epigenomic cell regulation	105
30945144	2019	Neurochemical research	Krokker, Lilla;Nyírő, Gábor;Reiniger, Lilla;Darvasi, Ottó;Szücs, Nikolette;Czirják, Sándor;Tóth, Miklós;Igaz, Péter;Patócs, Attila;Butz, Henriett	Differentially Expressed miRNAs Influence Metabolic Processes in Pituitary Oncocytoma.	Spindle cell oncocytomas (SCO) of the pituitary are rare tumors accounting for 0.1-0.4% of all sellar tumors. Due to their rarity, little information is available regarding their pathogenesis. Our aim was to investigate miRNA expression profile of pituitary oncocytomas. Total RNA was extracted from 9 formalin-fixed paraffin embedded pituitary samples (4 primary, 3 recurrent oncocytomas and 2 norm…	Journal Article	eng	PMC6776564	10.1007/s11064-019-02789-2	Adenoma, Oxyphilic;Adult;Biomarkers, Tumor;Cell Proliferation;Down-Regulation;Female;Gene Expression Profiling;Gene Expression Regulation, Neoplastic;Humans;Male;MicroRNAs;Middle Aged;Pituitary Neoplasms;Transcriptome	32.8228	-1.30058	-10.5275	Epigenomic cell regulation	105
30816530	2019	Oncology reports	Xiong, Dan-Dan;Xu, Wen-Qing;He, Rong-Quan;Dang, Yi-Wu;Chen, Gang;Luo, Dian-Zhong	In silico analysis identified miRNA‑based therapeutic agents against glioblastoma multiforme.	MicroRNAs (miRNAs or miRs) contribute to the development of various malignant neoplasms, including glioblastoma multiforme (GBM). The present study aimed to explore the pathogenesis of GBM and to identify latent therapeutic agents for patients with GBM, based on an in silico analysis. Gene chips that provide miRNA expression profiling in GBM were obtained from the Gene Expression Omnibus (GEO) da…	Journal Article	eng	PMC6412522	10.3892/or.2019.7022	Androstadienes;Antineoplastic Agents;Brain Neoplasms;Computational Biology;Drug Discovery;Gefitinib;Gene Expression Profiling;Gene Expression Regulation, Neoplastic;Gene Regulatory Networks;Glioblastoma;Humans;MicroRNAs;Molecular Docking Simulation;Molecular Targeted Therapy;Sulfonamides;Transcriptome	35.5454	1.58614	-5.31244	Epigenomic cell regulation	105
30793921	2019	Epigenomics	Toraih, Eman A;Abdallah, Hoda Y;Rashed, Essam A;El-Wazir, Aya;Tantawy, Mohamed A;Fawzy, Manal S	Comprehensive data analysis for development of custom qRT-PCR miRNA assay for glioblastoma: a prevalidation study.	AIM: Glioblastoma (GB) is one notable example of miRNA-modulated neoplasms. Given its unique expression signature, proper miRNA profiling can help discriminate between GB and other types of brain tumors. The current work aimed to develop a more GB-specific and applicable custom designed quantitative real-time reverse transcription polymerase chain reaction (qRT-PCR) miRNA assay.MATERIALS &amp; ME…	Journal Article	eng		10.2217/epi-2018-0134		30.8937	0.104831	-10.6837	Epigenomic cell regulation	105
30769142	2019	Gene	Zainal Abidin, Shahidee;Fam, Sze-Zheng;Chong, Chan-Eng;Abdullah, Syahril;Cheah, Pike-See;Nordin, Norshariza;Ling, King-Hwa	miR-3099 promotes neurogenesis and inhibits astrogliogenesis during murine neural development.	MicroRNA-3099 is highly expressed during neuronal differentiation and development of the central nervous system. Here we characterised the role of miR-3099 during neural differentiation and embryonic brain development using a stable and regulatable mouse embryonic stem cell culture system for miR-3099 expression and in utero electroporation of miR-3099 expression construct into E15.5 embryonic mo…	Journal Article	eng		10.1016/j.gene.2019.02.014	Animals;Astrocytes;Brain;Cell Differentiation;Cell Line;Cell Line, Tumor;Computer Simulation;HEK293 Cells;Humans;MCF-7 Cells;Mesenchymal Stem Cells;Mice;MicroRNAs;Mouse Embryonic Stem Cells;NIH 3T3 Cells;Neurogenesis;Neurons	38.1686	0.291034	-3.88359	Epigenomic cell regulation	105
30524906	2018	Oncoimmunology	Zeng, Ailiang;Yin, Jianxin;Wang, Zheng;Zhang, Chuanbao;Li, Rui;Zhang, Zhuoran;Yan, Wei;You, Yongping	miR-17-5p-CXCL14 axis related transcriptome profile and clinical outcome in diffuse gliomas.	GBM tissues are comprised of not only tumor cells but also tumor-associated nontumor cells, such as stromal cells and immune cells, which dilute the purity of glioma cells and function in glioma biology. However, the roles of miRNAs in modulating glioma purity are not clariﬁed. In total, 838 glioma samples with transcriptome data, including 537 RNAseq data from TCGA project and 301 microarray dat…	Journal Article	eng	PMC6279316	10.1080/2162402X.2018.1510277		33.684	1.23958	-3.85979	Epigenomic cell regulation	105
30539341	2018	Journal of neuro-oncology	Li, Ling;Shao, Mei-Ying;Zou, Shu-Cheng;Xiao, Zhe-Feng;Chen, Zhu-Chu	MiR-101-3p inhibits EMT to attenuate proliferation and metastasis in glioblastoma by targeting TRIM44.	BACKGROUND: Glioblastoma (GBM) is the most common malignant tumor originating in the brain parenchyma. The invasive and infiltrative properties of glioblastoma result in poor clinical prognosis to conventional therapies. Emerging reports on microRNAs as important regulators during the process of EMT provide new insights into treating glioblastoma through new targets. However, underlying molecular…	Journal Article	eng		10.1007/s11060-018-2973-7	Brain Neoplasms;Carrier Proteins;Cell Line, Tumor;Cell Proliferation;Epithelial-Mesenchymal Transition;Gene Expression Regulation, Neoplastic;Glioblastoma;Humans;MicroRNAs;Neoplasm Metastasis	37.7608	2.24768	-3.58483	Epigenomic cell regulation	105
30244172	2018	Cellular signalling	Ahir, Bhavesh K;Lakka, Sajani S	Elucidating the microRNA-203 specific biological processes in glioblastoma cells from comprehensive RNA-sequencing transcriptome profiling.	Glioblastoma (GBM) is the most common primary malignant intracranial adult brain tumor. Allelic deletion on chromosome 14q plays an essential role in GBM pathogenesis, and this chromosome 14q site was thought to harbor multiple tumor suppressor genes associated with GBM, a region that also encodes microRNA-203 (miR-203). This study was conducted to identify whole transcriptome profile changes ass…	Journal Article	eng		10.1016/j.cellsig.2018.09.014	Alternative Splicing;Brain Neoplasms;Cell Line, Tumor;Gene Expression Profiling;Gene Expression Regulation, Neoplastic;Glioblastoma;Humans;MicroRNAs;Transcriptome	36.7125	1.31281	-3.09471	Epigenomic cell regulation	105
30176243	2018	Brain research	Gulluoglu, Sukru;Tuysuz, Emre Can;Sahin, Mesut;Kuskucu, Aysegul;Kaan Yaltirik, Cumhur;Ture, Ugur;Kucukkaraduman, Baris;Akbar, Muhammad Waqas;Gure, Ali Osmay;Bayrak, Omer Faruk;Dalan, Altay Burak	Simultaneous miRNA and mRNA transcriptome profiling of glioblastoma samples reveals a novel set of OncomiR candidates and their target genes.	Although glioblastomas are common, there remains a need to elucidate the underlying mechanisms behind their initiation and progression and identify molecular pathways for improving treatment. In this study, sixteen fresh-frozen glioblastoma samples and seven samples of healthy brain tissues were analyzed with miRNA and whole transcriptome microarray chips. Candidate miRNAs and mRNAs were selected…	Journal Article	eng		10.1016/j.brainres.2018.08.035	Apoptosis;Biomarkers, Tumor;Brain;Brain Neoplasms;Cell Line, Tumor;Cohort Studies;Computer Simulation;Gene Expression Profiling;Gene Expression Regulation, Neoplastic;Glioblastoma;Humans;MicroRNAs;Microarray Analysis;Prognosis;RNA, Messenger;Survival Analysis;Transcriptome	30.855	0.284412	-9.93474	Epigenomic cell regulation	105
30124166	2018	Biological research	Wei, Li;He, Fei;Zhang, Wen;Chen, Wenhua;Yu, Bo	Bioinformatics analysis of microarray data to reveal the pathogenesis of diffuse intrinsic pontine glioma.	BACKGROUND: Diffuse intrinsic pontine glioma (DIPG) is the main cause of pediatric brain tumor death. This study was designed to identify key genes associated with DIPG.METHODS: The gene expression profile GSE50021, which consisted of 35 pediatric DIPG samples and 10 normal brain samples, was downloaded from the Gene Expression Omnibus database. Differentially expressed genes (DEGs) were identifi…	Journal Article	eng	PMC6100713	10.1186/s40659-018-0175-6	Brain Stem Neoplasms;Computational Biology;Down-Regulation;Glioma;Humans;MicroRNAs;Microarray Analysis;Real-Time Polymerase Chain Reaction;Transcriptome;Up-Regulation	30.1726	0.449255	-5.37521	Epigenomic cell regulation	105
30015885	2018	Molecular medicine reports	Xie, Chen;Xu, Meng;Lu, Dejuan;Zhang, Weiguang;Wang, Laizang;Wang, Hongwei;Li, Jianhua;Ren, Fubin;Wang, Chao	Candidate genes and microRNAs for glioma pathogenesis and prognosis based on gene expression profiles.	Glioma is the most common malignant brain tumor, and the incidence of glioma demonstrates an upward trend. It is vital to elucidate the pathogenesis of glioma and seek effective therapies. The aim of the present study was to identify the potential gene markers associated with glioma based on GSE31262 gene expression profiles, and to explore the underlying mechanism of glioma progression by analyz…	Journal Article	eng	PMC6102685	10.3892/mmr.2018.9231	Brain Neoplasms;Computational Biology;Gene Expression Regulation, Neoplastic;Gene Regulatory Networks;Glioma;Humans;MicroRNAs;Prognosis;Protein Interaction Maps;Transcriptome	30.2161	0.490417	-5.2648	Epigenomic cell regulation	105
29915328	2018	Scientific reports	Sharma, Salil;Khadimallah, Ines;Corya, Adam Williamson;Ali, Yousuf Omar;Rao, Xi;Liu, Yunlong;Lu, Hui-Chen	Presymptomatic change in microRNAs modulates Tau pathology.	MicroRNAs (miRs) are 18~23 nucleotides long non-coding RNAs that regulate gene expression. To explore whether miR alterations in tauopathy contribute to pathological conditions, we first determined which hippocampal miRs are altered at the presymptomatic and symptomatic stages of tauopathy using rTg4510 mice (Tau mice), a well-characterized tauopathy model. miR-RNA pairing analysis using QIAGEN I…	Journal Article	eng	PMC6006352	10.1038/s41598-018-27527-6	Aging;Animals;Female;Gene Regulatory Networks;Hippocampus;Humans;Mice, Inbred ICR;Mice, Transgenic;MicroRNAs;Microglia;Neurons;RNA, Messenger;Tauopathies;Transcription, Genetic;Transcriptome;Up-Regulation;tau Proteins	36.6094	0.821112	-2.86311	Epigenomic cell regulation	105
29769662	2018	Scientific reports	Nayak, Subhashree;Aich, Meghali;Kumar, Anupam;Sengupta, Suman;Bajad, Prajakta;Dhapola, Parashar;Paul, Deepanjan;Narta, Kiran;Purkrait, Suvendu;Mehani, Bharati;Suri, Ashish;Chakraborty, Debojyoti;Mukhopadhyay, Arijit;Sarkar, Chitra	Novel internal regulators and candidate miRNAs within miR-379/miR-656 miRNA cluster can alter cellular phenotype of human glioblastoma.	Clustered miRNAs can affect functioning of downstream pathways due to possible coordinated function. We observed 78-88% of the miR-379/miR-656 cluster (C14MC) miRNAs were downregulated in three sub-types of diffuse gliomas, which was also corroborated with analysis from The Cancer Genome Atlas (TCGA) datasets. The miRNA expression levels decreased with increasing tumor grade, indicating this down…	Journal Article	eng	PMC5955984	10.1038/s41598-018-26000-8	Apoptosis;Biomarkers, Tumor;Brain Neoplasms;Case-Control Studies;Cell Proliferation;Gene Expression Profiling;Gene Expression Regulation, Neoplastic;Glioblastoma;Humans;MicroRNAs;Neoplasm Invasiveness;Phenotype;Tumor Cells, Cultured	36.7083	0.206684	-7.23634	Epigenomic cell regulation	105
29593734	2018	Frontiers in immunology	Martin, Nellie A;Molnar, Viktor;Szilagyi, Gabor T;Elkjaer, Maria L;Nawrocki, Arkadiusz;Okarmus, Justyna;Wlodarczyk, Agnieszka;Thygesen, Eva K;Palkovits, Miklos;Gallyas, Ferenc;Larsen, Martin R;Lassmann, Hans;Benedikz, Eirikur;Owens, Trevor;Svenningsen, Asa F;Illes, Zsolt	Experimental Demyelination and Axonal Loss Are Reduced in MicroRNA-146a Deficient Mice.	MicroRNAs were examined by Agilent Mouse miRNA Microarray in the corpus callosum during CPZ-induced demyelination and remyelination. Demyelination, axonal loss, changes in number of oligodendrocytes, OPCs, and macrophages/microglia was compared by histology/immunohistochemistry between KO and WT mice. Differential expression of target genes and proteins of miR-146a was analyzed in the transcripto…	Journal Article	eng	PMC5857529	10.3389/fimmu.2018.00490	Animals;Axons;Cell Differentiation;Chemokine CCL2;Corpus Callosum;Cuprizone;Demyelinating Diseases;Female;Gene Expression Profiling;Humans;Mice;Mice, Inbred C57BL;Mice, Knockout;MicroRNAs;Models, Animal;Oligodendroglia;Receptors, Tumor Necrosis Factor	32.4505	-1.173	-1.10646	Epigenomic cell regulation	105
29497332	2018	Cancer management and research	Gershanov, Sivan;Toledano, Helen;Michowiz, Shalom;Barinfeld, Orit;Pinhasov, Albert;Goldenberg-Cohen, Nitza;Salmon-Divon, Mali	MicroRNA-mRNA expression profiles associated with medulloblastoma subgroup 4.	Medulloblastoma (MB), the most common malignant brain tumor in children, is divided into four tumor subgroups: wingless-type (WNT), sonic hedgehog (SHH), Group 3, and Group 4. Ideally, clinical practice and treatment design should be subgroup specific. While WNT and SHH subgroups have well-defined biomarkers, distinguishing Group 3 from Group 4 is not straightforward. MicroRNAs (miRNAs), which re…	Journal Article	eng	PMC5818864	10.2147/CMAR.S156709		31.1305	-0.514801	-12.0414	Epigenomic cell regulation	105
29457830	2018	International journal of cancer	Zhang, Guilong;Chen, Lukui;Khan, Ahsan Ali;Li, Bingqian;Gu, Bin;Lin, Fan;Su, Xinhui;Yan, Jianghua	miRNA-124-3p/neuropilin-1(NRP-1) axis plays an important role in mediating glioblastoma growth and angiogenesis.	Glioblastoma multiforme (GBM) is the most lethal brain malignancy which involves multi-gene abnormality. Unfortunately, effective therapy against GBM remains lacking. Previously, we found that NRP-1 and its downstream NRP-1/GIPC1 pathway played an important role in GBM. In our study, we further investigated the upstream signaling of NRP-1 to understand how it is regulated. First, we identified th…	Journal Article	eng		10.1002/ijc.31329	3' Untranslated Regions;Adult;Aged;Aged, 80 and over;Apoptosis;Brain;Cell Cycle;Cell Line, Tumor;Cell Movement;Cell Proliferation;Extracellular Signal-Regulated MAP Kinases;Female;Gene Expression Profiling;Gene Expression Regulation, Neoplastic;Glioblastoma;High-Throughput Nucleotide Sequencing;Humans;Male;MicroRNAs;Middle Aged;NF-kappa B;Neovascularization, Pathologic;Neuropilin-1;Oncogene Prote…	36.2321	2.25855	-4.55118	Epigenomic cell regulation	105
29383182	2018	Oncotarget	Lourdusamy, Anbarasu;Luo, Li Z;Storer, Lisa Cd;Cohen, Kenneth J;Resar, Linda;Grundy, Richard G	Transcriptomic analysis in pediatric spinal ependymoma reveals distinct molecular signatures.	Pediatric spinal ependymomas (SEPN) are important albeit uncommon malignant central nervous system tumors with limited treatment options. Our current knowledge about the underlying biology of these tumors is limited due to their rarity. To begin to elucidate molecular mechanisms that give rise to pediatric SEPN, we compared the transcriptomic landscape of SEPNs to that of intracranial ependymomas…	Journal Article	eng	PMC5777794	10.18632/oncotarget.23311		30.2381	-1.14925	-7.51013	Epigenomic cell regulation	105
29335913	2018	Journal of neuro-oncology	Yuan, Yang;Jiaoming, Li;Xiang, Wang;Yanhui, Liu;Shu, Jiang;Maling, Gou;Qing, Mao	Analyzing the interactions of mRNAs, miRNAs, lncRNAs and circRNAs to predict competing endogenous RNA networks in glioblastoma.	Cross-talk between competitive endogenous RNAs (ceRNAs) may play a critical role in revealing potential mechanisms of tumor development and physiology. Glioblastoma is the most common type of malignant primary brain tumor, and the mechanisms of tumor genesis and development in glioblastoma are unclear. Here, to investigate the role of non-coding RNAs and the ceRNA network in glioblastoma, we perf…	Journal Article	eng		10.1007/s11060-018-2757-0	Brain;Brain Neoplasms;Computational Biology;Gene Expression Regulation, Neoplastic;Glioblastoma;Humans;MicroRNAs;Microarray Analysis;RNA;RNA, Circular;RNA, Long Noncoding;RNA, Messenger;Sequence Analysis, RNA;Transcriptome	29.8062	-0.245292	-8.69607	Epigenomic cell regulation	105
29328410	2018	Oncology reports	Ma, Shun-Chang;Li, Qi;Peng, Jia-Yi;Zhouwen, Jian-Long;Zhang, Dai-Nan;Zhang, Chuan-Bao;Jiang, Wen-Guo;Jia, Wang	CLDN5 affects lncRNAs acting as ceRNA dynamics contributing to regulating blood‑brain barrier permeability in tumor brain metastasis.	The blood‑brain barrier (BBB) constitutes an efficient organization of tight junctions that limits the delivery of tumor to the brain. The principal tight junction protein in BBB is claudin‑5 (CLDN5), but its mechanism of action remains largely unknown. Long non‑coding RNAs (lncRNAs) are aberrantly expressed in many cancers, some lncRNAs play key roles in regulating BBB permeability and are invol…	Journal Article	eng		10.3892/or.2018.6208	Apoptosis;Biomarkers, Tumor;Blood-Brain Barrier;Brain Neoplasms;Cell Proliferation;Cells, Cultured;Claudin-5;Endothelium, Vascular;Gene Expression Regulation, Neoplastic;Gene Regulatory Networks;Humans;MicroRNAs;RNA, Long Noncoding;RNA, Messenger	29.7883	-0.375519	-8.53483	Epigenomic cell regulation	105
29288364	2017	Journal of cancer research and clinical oncology	Xu, Xiaoyue;Yu, Shaorong;Sun, Wenbo;Qin, Xiaobing;Chen, Yan;Zhou, Leilei;Lou, Rui;Dong, Shuchen;Shen, Bo;Wu, Jianzhong;Zang, Jialan;Cao, Haixia;Shi, Meiqi;Zhang, Qin;Feng, Jifeng	MiRNA signature predicts the response of patients with advanced lung adenocarcinoma to platinum-based treatment.	BACKGROUND: Accumulating literature proved that miRNAs can regulate the sensitivity of platinum and act as a promising candidate to predict the response of patients with lung adenocarcinoma to chemotherapy. However, most studies on miRNAs were restricted to in vitro experiments. This study aimed to evaluate whether miRNAs alone or in combination (miRNA signature) can act as predictive biomarkers …	Journal Article	eng		10.1007/s00432-017-2562-8	Adenocarcinoma;Adenocarcinoma of Lung;Adult;Antineoplastic Combined Chemotherapy Protocols;Biomarkers, Pharmacological;Biomarkers, Tumor;Cisplatin;Drug Resistance, Neoplasm;Female;Gene Expression Profiling;Gene Expression Regulation, Neoplastic;Humans;Lung Neoplasms;Male;MicroRNAs;Oligonucleotide Array Sequence Analysis;Prognosis;Transcriptome	31.841	0.303056	-11.526	Epigenomic cell regulation	105
29179434	2017	Oncotarget	Kovalchuk, Anna;Ilnytskyy, Yaroslav;Rodriguez-Juarez, Rocio;Katz, Amanda;Sidransky, David;Kolb, Bryan;Kovalchuk, Olga	Growth of malignant extracranial tumors alters microRNAome in the prefrontal cortex of TumorGraft mice.	A wide array of central nervous system complications, neurological deficits, and cognitive impairments occur and persist as a result of systemic cancer and cancer treatments. This condition is known as chemo brain and it affects over half of cancer survivors. Recent studies reported that cognitive impairments manifest before chemotherapy and are much broader than chemo brain alone, thereby adding…	Journal Article	eng	PMC5687604	10.18632/oncotarget.19835		29.7345	-0.700028	-8.02822	Epigenomic cell regulation	105
29110584	2017	Tumour biology : the journal of the International Society for Oncodevelopmental Biology and Medicine	Toraih, Eman Ali;Aly, Nagwa Mahmoud;Abdallah, Hoda Y;Al-Qahtani, Saeed Awad;Shaalan, Aly Am;Hussein, Mohammad Hosny;Fawzy, Manal Said	MicroRNA-target cross-talks: Key players in glioblastoma multiforme.	The role of microRNAs in brain cancer is still naive. Some act as oncogene and others as tumor suppressors. Discovery of efficient biomarkers is mandatory to debate that aggressive disease. Bioinformatically selected microRNAs and their targets were investigated to evaluate their putative signature as diagnostic and prognostic biomarkers in primary glioblastoma multiforme. Expression of a panel o…	Journal Article	eng		10.1177/1010428317726842	Adult;Area Under Curve;Brain Neoplasms;Cluster Analysis;Female;Glioblastoma;Humans;Male;MicroRNAs;Middle Aged;ROC Curve;Transcriptome	39.4908	0.472653	-3.69276	Epigenomic cell regulation	105
29079539	2017	Molecular and cellular neurosciences	Maffioletti, Elisabetta;Salvi, Alessandro;Conde, Isabel;Maj, Carlo;Gennarelli, Massimo;De Petro, Giuseppina;Bocchio-Chiavetto, Luisella	Study of the in vitro modulation exerted by the antidepressant drug escitalopram on the expression of candidate microRNAs and their target genes.	Recent studies indicated a role of microRNAs (miRNAs, small non-coding RNAs which regulate the expression of target genes by acting on mRNAs) in several neural processes, in the pathogenetic mechanisms of neuropsychiatric diseases and in the action of psychotropic drugs. A modulation induced by the antidepressant drug escitalopram on the expression levels of 30 miRNAs was highlighted in the blood…	Journal Article	eng		10.1016/j.mcn.2017.10.005	Antidepressive Agents, Second-Generation;Cell Line, Tumor;Citalopram;Gene Expression Regulation;Humans;MicroRNAs;Neurons	34.7871	0.529124	-5.87746	Epigenomic cell regulation	105
28840260	2017	Journal of molecular medicine (Berlin, Germany)	Majumdar, Atreye;Ahmad, Fahim;Sheikh, Touseef;Bhagat, Reshma;Pathak, Pankaj;Joshi, Shanker Datt;Seth, Pankaj;Tandon, Vivek;Tripathi, Manjari;Saratchandra, P;Sarkar, Chitra;Sen, Ellora	miR-217-casein kinase-2 cross talk regulates ERK activation in ganglioglioma.	Gangliogliomas (GGs) are the most commonly diagnosed long-term epilepsy-associated tumors (LEATs). Although molecular characterizations of brain tumors have identified few novel biomarkers among the LEATs, mechanisms of pathogenesis remain poorly understood. In this study, global microarray-based microRNA (miRNA) expression profile on a set of 9 GGs indicated 66 miRNAs to be differentially expres…	Journal Article	eng		10.1007/s00109-017-1571-z	Casein Kinase II;Cell Line, Tumor;Cluster Analysis;Extracellular Signal-Regulated MAP Kinases;Ganglioglioma;Gene Expression Profiling;Glycogen;Humans;MicroRNAs;Mitogen-Activated Protein Kinase 1;Mitogen-Activated Protein Kinase 3;Neural Stem Cells;RNA Interference;Reproducibility of Results;Signal Transduction;Transcriptome	38.6703	0.530639	-3.75494	Epigenomic cell regulation	105
28811507	2017	Scientific reports	Scheel, Troels K H;Moore, Michael J;Luna, Joseph M;Nishiuchi, Eiko;Fak, John;Darnell, Robert B;Rice, Charles M	Global mapping of miRNA-target interactions in cattle (Bos taurus).	With roles in development, cell proliferation and disease, micro-RNA (miRNA) biology is of great importance and a potential therapeutic target. Here we used cross-linking immunoprecipitation (CLIP) and ligation of miRNA-target chimeras on the Argonaute (AGO) protein to globally map miRNA interactions in the cow. The interactome is the deepest reported to date. miRNA targeting principles are consi…	Journal Article	eng	PMC5557892	10.1038/s41598-017-07880-8	3' Untranslated Regions;Amino Acid Motifs;Animals;Cattle;Cell Line;Computational Biology;Gene Expression Profiling;Gene Expression Regulation;Gene Ontology;Humans;MicroRNAs;Molecular Sequence Annotation;Organ Specificity;RNA Interference;RNA, Messenger;Transcriptome	31.5973	-0.338487	-10.7189	Epigenomic cell regulation	105
28735896	2017	Molecular cell	Luna, Joseph M;Barajas, Juan M;Teng, Kun-Yu;Sun, Hui-Lung;Moore, Michael J;Rice, Charles M;Darnell, Robert B;Ghoshal, Kalpana	Argonaute CLIP Defines a Deregulated miR-122-Bound Transcriptome that Correlates with Patient Survival in Human Liver Cancer.	MicroRNA-122, an abundant and conserved liver-specific miRNA, regulates hepatic metabolism and functions as a tumor suppressor, yet systematic and direct biochemical elucidation of the miR-122 target network remains incomplete. To this end, we performed Argonaute crosslinking immunoprecipitation (Argonaute [Ago]-CLIP) sequencing in miR-122 knockout and control mouse livers, as well as in matched …	Journal Article	eng	PMC5603316	10.1016/j.molcel.2017.06.025	3' Untranslated Regions;Animals;Argonaute Proteins;Binding Sites;Carcinoma, Hepatocellular;Case-Control Studies;Cell Line, Tumor;Cell Proliferation;Computational Biology;Databases, Genetic;Down-Regulation;Exons;Gene Expression Regulation, Neoplastic;Genome-Wide Association Study;Genotype;Humans;Immunoprecipitation;Intracellular Signaling Peptides and Proteins;Liver Neoplasms;Mice;Mice, Knockout;M…	36.9068	0.447991	-3.94004	Epigenomic cell regulation	105
28627653	2017	Oncology reports	Xu, Liang;Yu, Ju;Wang, Zhongyong;Zhu, Qing;Wang, Wenjie;Lan, Qing	miR-543 functions as a tumor suppressor in glioma in vitro and in vivo.	Gliomas are the most common primary central nervous system tumors and account for approximately 80% of malignant brain tumors. MicroRNAs (miRNAs) are a class of small non-coding, regulatory RNA molecules that mediate the expression levels of specific proteins. As a member of the miRNA family, miR-543 plays a tumor suppressive or an oncogenic role in different types of tumors. However, the express…	Journal Article	eng	PMC5562083	10.3892/or.2017.5712	Animals;Apoptosis;Carcinogenesis;Cell Line, Tumor;Cell Proliferation;Gene Expression Regulation, Neoplastic;Glioma;Humans;Mice;MicroRNAs;Tumor Suppressor Proteins;Xenograft Model Antitumor Assays	38.5847	1.24245	-3.06193	Epigenomic cell regulation	105
28576488	2017	Biochemical and biophysical research communications	Hinske, Ludwig Christian;Heyn, Jens;Hübner, Max;Rink, Jessica;Hirschberger, Simon;Kreth, Simone	Intronic miRNA-641 controls its host Gene's pathway PI3K/AKT and this relationship is dysfunctional in glioblastoma multiforme.	MicroRNAs have established their role as important regulators of the epigenome. A considerable number of human miRNA genes are found in intronic regions of protein-coding host genes, in many cases adopting their regulatory circuitry. However, emerging evidence foreshadows an unprecedented importance for this relationship: Intronic miRNAs may protect the cell from overactivation of the respective …	Journal Article	eng		10.1016/j.bbrc.2017.05.175	Apoptosis;Glioblastoma;Humans;MicroRNAs;Phosphatidylinositol 3-Kinases;Proto-Oncogene Proteins c-akt;Tumor Cells, Cultured	35.4287	0.839299	-5.65073	Epigenomic cell regulation	105
28528185	2017	Biomedicine &amp; pharmacotherapy = Biomedecine &amp; pharmacotherapie	Huang, Wenzhong;Li, Zhenyu;Zhao, Liandong;Zhao, Wei	Simvastatin ameliorate memory deficits and inflammation in clinical and mouse model of Alzheimer's disease via modulating the expression of miR-106b.	BACKGROUND: Alzheimer's disease (AD) as a neurodegenerative brain disorder is a devastating pathology leading to disastrous cognitive impairments and dementia, and several studies have shown that AD is closely related to the inflammation, so anti-inflammatory treatment may provide therapeutic benefits. In this study, the effect of simvastatin on inflammation was investigated and the underlying me…	Randomized Controlled Trial	eng		10.1016/j.biopha.2017.05.060	Aged;Alzheimer Disease;Animals;Anti-Inflammatory Agents, Non-Steroidal;Apoptosis;Behavior, Animal;Cell Line, Tumor;Computational Biology;Double-Blind Method;Female;Gene Expression Regulation;Humans;Inflammation Mediators;Male;Maze Learning;Mice, Transgenic;MicroRNAs;Neural Stem Cells;Neurons;Nootropic Agents;RNA;Simvastatin	32.9361	-0.503487	-1.09512	Epigenomic cell regulation	105
28460486	2017	Oncotarget	Daugaard, Iben;Venø, Morten T;Yan, Yan;Kjeldsen, Tina E;Lamy, Philippe;Hager, Henrik;Kjems, Jørgen;Hansen, Lise Lotte	Small RNA sequencing reveals metastasis-related microRNAs in lung adenocarcinoma.	The majority of lung cancer deaths are caused by metastatic disease. MicroRNAs (miRNAs) are posttranscriptional regulators of gene expression and miRNA dysregulation can contribute to metastatic progression. Here, small RNA sequencing was used to profile the miRNA and piwi-interacting RNA (piRNA) transcriptomes in relation to lung cancer metastasis. RNA-seq was performed using RNA extracted from …	Journal Article	eng	PMC5432317	10.18632/oncotarget.15968	Adenocarcinoma;Adenocarcinoma of Lung;DNA Methylation;Gene Expression Profiling;Gene Expression Regulation, Neoplastic;Humans;Lung Neoplasms;MicroRNAs;Neoplasm Metastasis;Neoplasm Staging;Promoter Regions, Genetic;Reproducibility of Results;Sequence Analysis, RNA;Transcriptome	33.2757	0.768582	-10.0887	Epigenomic cell regulation	105
28440450	2017	Molecular medicine reports	Dai, Junqiang;Li, Qiao;Bing, Zhitong;Zhang, Yinian;Niu, Liang;Yin, Hang;Yuan, Guoqiang;Pan, Yawen	Comprehensive analysis of a microRNA expression profile in pediatric medulloblastoma.	Medulloblastoma is the most common malignant brain tumor of the central nervous system among children. Medulloblastoma is an embryonal tumor, of which little is known about the pathogenesis. Several efforts have been made to understand the molecular aspects of its tumorigenic pathways; however, these are poorly understood. microRNA (miRNA), a type of non‑coding short RNA, has been proven to be as…	Journal Article	eng	PMC5436210	10.3892/mmr.2017.6490	Age Factors;Case-Control Studies;Child;Child, Preschool;Computational Biology;Databases, Nucleic Acid;Gene Expression Profiling;Gene Expression Regulation, Neoplastic;Gene Regulatory Networks;Humans;Medulloblastoma;MicroRNAs;Transcriptome	30.1021	-0.763583	-9.9139	Epigenomic cell regulation	105
28389653	2017	Scientific reports	Ho, Kuo-Hao;Chen, Peng-Hsu;Hsi, Edward;Shih, Chwen-Ming;Chang, Wei-Chiao;Cheng, Chia-Hsiung;Lin, Cheng-Wei;Chen, Ku-Chung	Identification of IGF-1-enhanced cytokine expressions targeted by miR-181d in glioblastomas via an integrative miRNA/mRNA regulatory network analysis.	The insulin-like growth factor (IGF)-1 signaling is relevant in regulating cell growth and cytokine secretions by glioblastomas. MicroRNAs determine the cell fate in glioblastomas. However, relationships between IGF-1 signaling and miRNAs in glioblastoma pathogenesis are still unclear. Our aim was to validate the IGF-1-mediated mRNA/miRNA regulatory network in glioblastomas. Using in silico analy…	Journal Article	eng	PMC5429683	10.1038/s41598-017-00826-0	3' Untranslated Regions;Cell Line, Tumor;Computational Biology;Cytokines;Gene Expression Profiling;Gene Expression Regulation, Neoplastic;Gene Regulatory Networks;Glioblastoma;Humans;Insulin-Like Growth Factor I;MicroRNAs;Prognosis;RNA Interference;RNA, Messenger;Transcriptome	35.9645	0.613066	-5.30567	Epigenomic cell regulation	105
28378523	2017	Molecular oncology	Nawaz, Zahid;Patil, Vikas;Thinagararjan, Sivaarumugam;Rao, Soumya A;Hegde, Alangar S;Arivazhagan, Arimappamagan;Santosh, Vani;Somasundaram, Kumaravel	Impact of somatic copy number alterations on the glioblastoma miRNome: miR-4484 is a genomically deleted tumour suppressor.	Glioblastoma (GBM) is the most frequent and most malignant primary brain tumour in adults. GBMs have a unique landscape of somatic copy number alterations (SCNAs), with the concomitant appearance of numerous driver amplifications and deletions. Here, we examined the genomic regions harbouring SCNAs and their impact on the GBM miRNome. We found that 40% of SCNA events covering 70-88% of the genomi…	Journal Article	eng	PMC5537698	10.1002/1878-0261.12060	Adult;Brain Neoplasms;Cell Line, Tumor;Female;Gene Deletion;Gene Dosage;Genes, Tumor Suppressor;Glioblastoma;Humans;Male;MicroRNAs;RNA, Neoplasm	35.7441	1.48344	-5.7417	Epigenomic cell regulation	105
28368417	2017	Oncogene	Deguchi, S;Katsushima, K;Hatanaka, A;Shinjo, K;Ohka, F;Wakabayashi, T;Zong, H;Natsume, A;Kondo, Y	Oncogenic effects of evolutionarily conserved noncoding RNA ECONEXIN on gliomagenesis.	Accumulating studies have demonstrated the importance of long noncoding RNAs (lncRNAs) during oncogenic transformation. However, because most lncRNAs are currently uncharacterized, the identification of novel oncogenic lncRNAs is difficult. Given that intergenic lncRNA have substantially less sequence conservation patterns than protein-coding genes across species, evolutionary conserved intergeni…	Journal Article	eng		10.1038/onc.2017.88	Animals;Antigens, Neoplasm;Brain Neoplasms;Carcinogenesis;Cell Line, Tumor;Cell Proliferation;Conserved Sequence;DNA Topoisomerases, Type II;DNA-Binding Proteins;Disease Progression;Down-Regulation;Glioma;Humans;Mice;MicroRNAs;Oncogenes;Poly-ADP-Ribose Binding Proteins;Precancerous Conditions;RNA, Long Noncoding;RNA-Induced Silencing Complex;Up-Regulation	33.0268	0.199311	-0.833748	Epigenomic cell regulation	105
28323865	2017	PloS one	Lee, Chin-Cheng;Chen, Peng-Hsu;Ho, Kuo-Hao;Shih, Chwen-Ming;Cheng, Chia-Hsiung;Lin, Cheng-Wei;Cheng, Kur-Ta;Liu, Ann-Jeng;Chen, Ku-Chung	The microRNA-302b-inhibited insulin-like growth factor-binding protein 2 signaling pathway induces glioma cell apoptosis by targeting nuclear factor IA.	MicroRNAs are small noncoding RNAs that post-transcriptionally control the expression of genes involved in glioblastoma multiforme (GBM) development. Although miR-302b functions as a tumor suppressor, its role in GBM is still unclear. Therefore, this study comprehensively explored the roles of miR-302b-mediated gene networks in GBM cell death. We found that miR-302b levels were significantly high…	Journal Article	eng	PMC5360322	10.1371/journal.pone.0173890	Apoptosis;Astrocytes;Cell Line, Tumor;Cell Survival;Down-Regulation;Gene Knockdown Techniques;Gene Regulatory Networks;Glioblastoma;Glioma;Humans;Insulin-Like Growth Factor Binding Protein 2;MicroRNAs;NFI Transcription Factors;Promoter Regions, Genetic;Signal Transduction;Transcriptome	36.8235	1.51201	-3.18434	Epigenomic cell regulation	105
28286260	2017	Cancer letters	Yang, Fan;Liu, Xing;Liu, Yanwei;Liu, Yuqing;Zhang, Chuanbao;Wang, Zheng;Jiang, Tao;Wang, Yongzhi	miR-181d/MALT1 regulatory axis attenuates mesenchymal phenotype through NF-κB pathways in glioblastoma.	The mesenchymal (MES) subtype of glioblastoma (GBM) indicated a more malignant phenotype and worse prognosis compared with their proneural (PN) counterpart. The plasticity between PN and MES transcriptome signatures provided an approach for clinical intervention. However, few miRNAs have been identified to participate in the shift between subtypes. Here, we utilized transcriptomic data and experi…	Journal Article	eng		10.1016/j.canlet.2017.03.002	Animals;Brain Neoplasms;Caspases;Cell Line, Tumor;Cell Proliferation;Female;Glioblastoma;Heterografts;Humans;Mice;Mice, Inbred BALB C;Mice, Nude;MicroRNAs;Mucosa-Associated Lymphoid Tissue Lymphoma Translocation 1 Protein;NF-kappa B;Neoplasm Proteins;Phenotype;Prognosis;Signal Transduction	36.52	2.28931	-4.36158	Epigenomic cell regulation	105
28155650	2017	BMC genomics	Yerukala Sathipati, Srinivasulu;Huang, Hui-Ling;Ho, Shinn-Ying	Estimating survival time of patients with glioblastoma multiforme and characterization of the identified microRNA signatures.	Though glioblastoma multiforme (GBM) is the most frequently occurring brain malignancy in adults, clinical treatment still faces challenges due to poor prognoses and tumor relapses. Recently, microRNAs (miRNAs) have been extensively used with the aim of developing accurate molecular therapies, because of their emerging role in the regulation of cancer-related genes. This work aims to identify the…	Journal Article	eng	PMC5260001	10.1186/s12864-016-3321-y	Brain Neoplasms;Cluster Analysis;Computational Biology;Databases, Nucleic Acid;Gene Expression Profiling;Glioblastoma;Humans;MicroRNAs;Prognosis;RNA Interference;RNA, Messenger;Signal Transduction;Transcriptome	35.8084	1.09168	-6.92563	Epigenomic cell regulation	105
27880937	2016	Oncotarget	Schliesser, Maximilian Georg;Claus, Rainer;Hielscher, Thomas;Grimm, Christiane;Weichenhan, Dieter;Blaes, Jonas;Wiestler, Benedikt;Hau, Peter;Schramm, Johannes;Sahm, Felix;Weiß, Elisa K;Weiler, Markus;Baer, Constance;Schmidt-Graf, Friederike;Schackert, Gabriele;Westphal, Manfred;Hertenstein, Anne;Roth, Patrick;Galldiks, Norbert;Hartmann, Christian;Pietsch, Torsten;Felsberg, Joerg;Reifenberger, Gui…	Prognostic relevance of miRNA-155 methylation in anaplastic glioma.	The outcome of patients with anaplastic gliomas varies considerably depending on single molecular markers, such as mutations of the isocitrate dehydrogenase (IDH) genes, as well as molecular classifications based on epigenetic or genetic profiles. Remarkably, 98% of the RNA within a cell is not translated into proteins. Of those, especially microRNAs (miRNAs) have been shown not only to have a ma…	Journal Article	eng	PMC5347671	10.18632/oncotarget.13452	Antineoplastic Agents, Alkylating;Biomarkers, Tumor;Brain Neoplasms;Cell Line, Tumor;DNA Methylation;Dacarbazine;Drug Resistance, Neoplasm;Epigenesis, Genetic;Gene Expression Regulation, Neoplastic;Genetic Predisposition to Disease;Glioma;Humans;Kaplan-Meier Estimate;MicroRNAs;NF-kappa B;Phenotype;Prognosis;Promoter Regions, Genetic;Proportional Hazards Models;RNA Interference;Radiation Tolerance…	34.3908	0.915913	-5.59377	Epigenomic cell regulation	105
27871300	2016	Molecular cancer	Nawaz, Zahid;Patil, Vikas;Paul, Yashna;Hegde, Alangar S;Arivazhagan, Arimappamagan;Santosh, Vani;Somasundaram, Kumaravel	PI3 kinase pathway regulated miRNome in glioblastoma: identification of miR-326 as a tumour suppressor miRNA.	Glioblastomas (GBM) continue to remain one of the most dreaded tumours that are highly infiltrative in nature and easily preclude comprehensive surgical resection. GBMs pose an intricate etiology as they are being associated with a plethora of genetic and epigenetic lesions. Misregulation of the PI3 kinase pathway is one of the most familiar events in GBM. While the PI3 kinase signalling regulate…	Journal Article	eng	PMC5117574	10.1186/s12943-016-0557-8	Brain Neoplasms;Cell Line, Tumor;Cell Transformation, Neoplastic;Cluster Analysis;Computational Biology;Gene Expression Profiling;Gene Expression Regulation, Neoplastic;Gene Ontology;Genes, Tumor Suppressor;Glioblastoma;Humans;MicroRNAs;Phosphatidylinositol 3-Kinases;RNA Interference;Signal Transduction;Transcriptome;beta-Arrestin 1	35.7823	1.33449	-5.62149	Epigenomic cell regulation	105
27626168	2016	Oncotarget	Tanno, Barbara;Babini, Gabriele;Leonardi, Simona;Giardullo, Paola;De Stefano, Ilaria;Pasquali, Emanuela;Ottolenghi, Andrea;Atkinson, Michael J;Saran, Anna;Mancuso, Mariateresa	Ex vivo miRNome analysis in Ptch1+/- cerebellum granule cells reveals a subset of miRNAs involved in radiation-induced medulloblastoma.	It has historically been accepted that incorrectly repaired DNA double strand breaks (DSBs) are the principal lesions of importance regarding mutagenesis, and long-term biological effects associated with ionizing radiation. However, radiation may also cause dysregulation of epigenetic processes that can lead to altered gene function and malignant transformation, and epigenetic alterations are imp…	Journal Article	eng	PMC5356552	10.18632/oncotarget.11938	Animals;Animals, Newborn;Cerebellar Neoplasms;Cerebellum;Gene Expression Profiling;Gene Expression Regulation, Neoplastic;Gene Regulatory Networks;Hedgehog Proteins;Medulloblastoma;Mice, Knockout;MicroRNAs;Patched-1 Receptor;Signal Transduction;Transcriptome	29.8318	-1.05916	-9.65982	Epigenomic cell regulation	105
27614160	2016	Biomaterials	Cosset, E;Petty, T;Dutoit, V;Tirefort, D;Otten-Hernandez, P;Farinelli, L;Dietrich, P-Y;Preynat-Seauve, O	Human tissue engineering allows the identification of active miRNA regulators of glioblastoma aggressiveness.	Glioblastoma multiforme (GBM) is among the most aggressive cancers associated with massive infiltration of peritumoral parenchyma by migrating tumor cells. The infiltrative nature of GBM cells, the intratumoral heterogeneity concomitant with redundant signaling pathways likely underlie the inability of conventional and targeted therapies to achieve long-term remissions. In this respect, microRNAs…	Journal Article	eng		10.1016/j.biomaterials.2016.08.009	Cell Adhesion;Cell Proliferation;Cells, Cultured;Gene Expression Regulation, Neoplastic;Glioblastoma;Humans;MicroRNAs;Neoplasm Invasiveness;Neural Stem Cells;Signal Transduction;Tissue Engineering	31.4283	1.03761	-7.70095	Epigenomic cell regulation	105
27272948	2016	Child's nervous system : ChNS : official journal of the International Society for Pediatric Neurosurgery	Samis, Jill;Vanin, Elio F;Sredni, Simone Treiger;de Bonaldo, Maria de Fátima;Costa, Fabricio F;Tomita, Tadanori;Habiby, Reema;Zimmerman, Donald;Soares, Marcelo B	Extensive miRNA expression analysis in craniopharyngiomas.	PURPOSE: Craniopharyngiomas are benign tumors of the sellar or parasellar regions. They arise from the remnants of Rathke's pouch and are considered a &quot;developmental disease.&quot; microRNAs are short non-coding RNAs that play a key regulatory role in the control of expression of entire gene networks. We performed an extensive analysis of miRNAs in craniopharyngiomas aiming to identify a miR…	Journal Article	eng		10.1007/s00381-016-3131-1	Adolescent;Biomarkers, Tumor;Child;Child, Preschool;Craniopharyngioma;Female;Gene Expression Regulation, Neoplastic;Humans;Male;MicroRNAs;Pituitary Neoplasms	31.3139	-0.0820175	-9.74781	Epigenomic cell regulation	105
27239679	2016	Journal of proteome research	Lodrini, Marco;Poschmann, Gereon;Schmidt, Victoria;Wünschel, Jasmin;Dreidax, Daniel;Witt, Olaf;Höfer, Thomas;Meyer, Helmut E;Stühler, Kai;Eggert, Angelika;Deubzer, Hedwig E	Minichromosome Maintenance Complex Is a Critical Node in the miR-183 Signaling Network of MYCN-Amplified Neuroblastoma Cells.	MYCN and HDAC2 jointly repress the transcription of tumor suppressive miR-183 in neuroblastoma. Enforced miR-183 expression induces neuroblastoma cell death and inhibits xenograft growth in mice. Here we aimed to focus more closely on the miR-183 signaling network using a label-free mass spectrometric approach. Analysis of neuroblastoma cells transfected with either control or miR-183 expression …	Journal Article	eng		10.1021/acs.jproteome.6b00134	Cell Line, Tumor;Down-Regulation;Humans;Mass Spectrometry;MicroRNAs;Minichromosome Maintenance Complex Component 3;Minichromosome Maintenance Complex Component 5;Minichromosome Maintenance Proteins;N-Myc Proto-Oncogene Protein;Neuroblastoma;Signal Transduction;Transfection;Up-Regulation	38.1541	0.166039	-3.20713	Epigenomic cell regulation	105
27027350	2016	Oncotarget	Kim, Baek Gil;Kang, Suki;Han, Hyun Ho;Lee, Joo Hyun;Kim, Ji Eun;Lee, Sung Hwan;Cho, Nam Hoon	Transcriptome-wide analysis of compression-induced microRNA expression alteration in breast cancer for mining therapeutic targets.	Tumor growth-generated mechanical compression may increase or decrease expression of microRNAs, leading to tumor progression. However, little is known about whether mechanical compression induces aberrant expression of microRNAs in cancer and stromal cells. To investigate the relationship between compression and microRNA expression, microRNA array analysis was performed with breast cancer cell li…	Journal Article	eng	PMC5053664	10.18632/oncotarget.8322	Breast Neoplasms;Carcinoma, Ductal, Breast;Cell Line, Tumor;Disease Progression;Female;Gene Expression Profiling;Humans;MCF-7 Cells;MicroRNAs;Molecular Targeted Therapy;RNA, Messenger;Transcriptome;Tumor Cells, Cultured;Up-Regulation	34.231	0.381751	-1.48779	Epigenomic cell regulation	105
26962949	2016	Cell host &amp; microbe	Scheel, Troels K H;Luna, Joseph M;Liniger, Matthias;Nishiuchi, Eiko;Rozen-Gagnon, Kathryn;Shlomai, Amir;Auray, Gaël;Gerber, Markus;Fak, John;Keller, Irene;Bruggmann, Rémy;Darnell, Robert B;Ruggli, Nicolas;Rice, Charles M	A Broad RNA Virus Survey Reveals Both miRNA Dependence and Functional Sequestration.	Small non-coding RNAs have emerged as key modulators of viral infection. However, with the exception of hepatitis C virus, which requires the liver-specific microRNA (miRNA)-122, the interactions of RNA viruses with host miRNAs remain poorly characterized. Here, we used crosslinking immunoprecipitation (CLIP) of the Argonaute (AGO) proteins to characterize strengths and specificities of miRNA int…	Journal Article	eng	PMC4826034	10.1016/j.chom.2016.02.007	Animals;Cell Line;Host-Pathogen Interactions;Immunoprecipitation;MicroRNAs;Protein Biosynthesis;RNA Stability;RNA Viruses;RNA, Viral;Virus Replication	33.1077	-0.800804	-8.8329	Epigenomic cell regulation	105
26933822	2016	Oncotarget	Liang, Muh-Lii;Hsieh, Tsung-Han;Ng, Kim-Hai;Tsai, Ya-Ni;Tsai, Cheng-Fong;Chao, Meng-En;Liu, Da-Jung;Chu, Shing-Shiung;Chen, Wan;Liu, Yun-Ru;Liu, Ren-Shyan;Lin, Shih-Chieh;Ho, Donald Ming-Tak;Wong, Tai-Tong;Yang, Muh-Hwa;Wang, Hsei-Wei	Downregulation of miR-137 and miR-6500-3p promotes cell proliferation in pediatric high-grade gliomas.	Pediatric high-grade gliomas (pHGGs) are aggressive brain tumors affecting children, and outcomes have remained dismal, even with access to new multimodal therapies. In this study, we compared the miRNomes and transcriptomes of pediatric low- (pLGGs) and high-grade gliomas (pHGGs) using small RNA sequencing (smRNA-Seq) and gene expression microarray, respectively. Through integrated bioinformatic…	Journal Article	eng	PMC4991414	10.18632/oncotarget.7736	Antineoplastic Agents, Alkylating;Brain Neoplasms;Cell Cycle Proteins;Cell Line, Tumor;Cell Proliferation;Child;Child, Preschool;Chromosomal Proteins, Non-Histone;Dacarbazine;Down-Regulation;Female;Gene Expression Profiling;Gene Expression Regulation, Neoplastic;Glioma;Humans;Kinesin;Male;MicroRNAs;Neoplasm Grading;Oncogene Proteins;Temozolomide	38.6225	1.2116	-3.09483	Epigenomic cell regulation	105
26698155	2015	Medical oncology (Northwood, London, England)	Braoudaki, M;Lambrou, G I;Papadodima, S A;Stefanaki, K;Prodromou, N;Kanavakis, E	MicroRNA expression profiles in pediatric dysembryoplastic neuroepithelial tumors.	Among noncoding RNAs, microRNAs (miRNAs) have been most extensively studied, and their biology has repeatedly been proven critical for central nervous system pathological conditions. The diagnostic value of several miRNAs was appraised in pediatric dysembryoplastic neuroepithelial tumors (DNETs) using miRNA microarrays and receiving operating characteristic curves analyses. Overall, five pediatri…	Journal Article	eng		10.1007/s12032-015-0719-3	Area Under Curve;Biomarkers, Tumor;Brain Neoplasms;Child;Child, Preschool;Female;Humans;Male;MicroRNAs;Neoplasms, Neuroepithelial;Oligonucleotide Array Sequence Analysis;ROC Curve;Real-Time Polymerase Chain Reaction;Transcriptome	32.4546	-0.260325	-10.6809	Epigenomic cell regulation	105
26662303	2015	Tumour biology : the journal of the International Society for Oncodevelopmental Biology and Medicine	Chen, Hanchun;Lu, Qiong;Fei, Xifeng;Shen, Likui;Jiang, Dongyi;Dai, Dongwei	miR-22 inhibits the proliferation, motility, and invasion of human glioblastoma cells by directly targeting SIRT1.	Recently, microRNAs (miRNAs), a kind of small and non-coding RNA, can target the downstream molecules. Increasing evidence demonstrates that miRNAs meditate the onset and progression of a variety of tumors. In the present study, we carried out gene transfection, western blot, and reverse transcription PCR (RT-PCR) to explore the role of miR-22 in glioblastoma tissues and cell lines. Here, we veri…	Journal Article	eng		10.1007/s13277-015-4575-8	3' Untranslated Regions;Cell Line, Tumor;Cell Movement;Cell Proliferation;Gene Expression Profiling;Gene Expression Regulation, Neoplastic;Glioblastoma;Humans;MicroRNAs;RNA Interference;RNA, Messenger;Sirtuin 1;Transcriptome	37.7454	2.15788	-3.01497	Epigenomic cell regulation	105
26464075	2015	Journal of proteome research	Gupta, Manoj Kumar;Jayaram, Savita;Reddy, Divijendra Natha;Polisetty, Ravindra Varma;Sirdeshmukh, Ravi	Transcriptomic and Proteomic Data Integration and Two-Dimensional Molecular Maps with Regulatory and Functional Linkages: Application to Cell Proliferation and Invasion Networks in Glioblastoma.	Glioblastoma multiforme (GBM), the most aggressive primary brain tumor, is characterized by high rates of cell proliferation, migration, and invasion. New therapeutic strategies and targets are being continuously explored with the hope for better outcome. By overlaying transcriptomic and proteomic data from GBM clinical tissues, we identified 317 differentially expressed proteins to be concordant…	Journal Article	eng		10.1021/acs.jproteome.5b00765	Cell Proliferation;Central Nervous System Neoplasms;Computational Biology;Gene Expression Profiling;Gene Expression Regulation, Neoplastic;Gene Regulatory Networks;Glioblastoma;Humans;Metabolic Networks and Pathways;MicroRNAs;Proteins;Proteomics;RNA, Messenger	29.7891	0.662164	-9.05813	Epigenomic cell regulation	105
26437223	2015	Oncotarget	Lulli, Valentina;Buccarelli, Mariachiara;Martini, Maurizio;Signore, Michele;Biffoni, Mauro;Giannetti, Stefano;Morgante, Liliana;Marziali, Giovanna;Ilari, Ramona;Pagliuca, Alfredo;Larocca, Luigi Maria;De Maria, Ruggero;Pallini, Roberto;Ricci-Vitiani, Lucia	miR-135b suppresses tumorigenesis in glioblastoma stem-like cells impairing proliferation, migration and self-renewal.	Glioblastoma multiforme (GBM) is the most common and fatal malignant adult primary brain tumor. Currently, the overall prognosis for GBM patients remains poor despite advances in neurosurgery and adjuvant treatments. MicroRNAs (miRNAs) contribute to the pathogenesis of various types of tumor, including GBM. In this study we analyzed the expression of a panel of miRNAs, which are known to be diffe…	Journal Article	eng	PMC4741927	10.18632/oncotarget.5925	ADAM Proteins;ADAM12 Protein;Animals;Apoptosis;Cell Line, Tumor;Cell Movement;Cell Proliferation;Cell Self Renewal;Down-Regulation;Gene Expression Profiling;Gene Expression Regulation, Neoplastic;Genotype;Glioblastoma;Glycogen Synthase Kinase 3;Glycogen Synthase Kinase 3 beta;Heterografts;Humans;Male;Membrane Proteins;Mice, Inbred NOD;Mice, SCID;MicroRNAs;Neoplasm Invasiveness;Neoplastic Stem Cel…	36.4607	2.59088	-4.42353	Epigenomic cell regulation	105
26314961	2015	Oncotarget	Singh, Mohini;Garg, Neha;Venugopal, Chitra;Hallett, Robin;Tokar, Tomas;McFarlane, Nicole;Mahendram, Sujeivan;Bakhshinyan, David;Manoranjan, Branavan;Vora, Parvez;Qazi, Maleeha;Arpin, Carolynn C;Page, Brent;Haftchenary, Sina;Rosa, David A;Lai, Ping-Shan;Gómez-Biagi, Rodolfo F;Ali, Ahmed M;Lewis, Andrew;Geletu, Mulu;Murty, Naresh K;Hassell, John A;Jurisica, Igor;Gunning, Patrick T;Singh, Sheila K	STAT3 pathway regulates lung-derived brain metastasis initiating cell capacity through miR-21 activation.	Brain metastases (BM) represent the most common tumor to affect the adult central nervous system. Despite the increasing incidence of BM, likely due to consistently improving treatment of primary cancers, BM remain severely understudied. In this study, we utilized patient-derived stem cell lines from lung-to-brain metastases to examine the regulatory role of STAT3 in brain metastasis initiating c…	Journal Article	eng	PMC4695002	10.18632/oncotarget.4742	Animals;Brain Neoplasms;Cell Line, Tumor;Cell Movement;Gene Expression Regulation, Neoplastic;Genes, Regulator;Humans;Inhibitory Concentration 50;Lung Neoplasms;Mice;Mice, Inbred NOD;Mice, SCID;MicroRNAs;Neoplasm Metastasis;Neoplasm Transplantation;Protein Interaction Mapping;Proteomics;RNA, Small Interfering;STAT3 Transcription Factor;Stem Cells	34.508	0.38286	-1.50088	Epigenomic cell regulation	105
26307612	2015	Molecular neurobiology	Xu, Jingjing;Liu, Yuqiong;Guo, Si;Ma, Shengli;Xiao, Lin;Wei, Na;Xue, Rui	Expression Profile of MiR-128 in the Astrocytoma Patients and Cell Lines.	Malignant astrocytomas are the most common primary brain tumors. The critical characterizes of astrocyomas are their aggressive and infiltrative in the brain, which leads to uncontrollable by conventional forms of therapy. MicroRNAs are small RNAs that had been found to regulate their targets by specific binding to the 3'-untranslated region (3'UTR) of mRNA. Recent advances in understanding the m…	Journal Article	eng		10.1007/s12035-015-9401-1	Astrocytoma;Autoantigens;Brain Neoplasms;Cell Line, Tumor;HEK293 Cells;Humans;MicroRNAs;Neoplasm Grading;RNA, Small Cytoplasmic;Ribonucleoproteins;Transcriptome	36.9812	2.00553	-1.37196	Epigenomic cell regulation	105
26185541	2015	Journal of Cancer	Shervington, Leroy;Patil, Harshada;Shervington, Amal	Could the Anti-Chaperone VER155008 Replace Temozolomide for Glioma Treatment.	Cancer inducible molecular chaperone HSP90 is of great importance as an anticancer target. Proteomic analysis showed that inhibiting HSP90 by the geldanamycin derivative, 17-AAG elevated the expression of the co-chaperone Hsp70. In this study we used HSP90 selective inhibitor 17-AAG and HSP70/90 dual inhibitor, VER155008 (VER) in U87-MG glioma cells. miRNAs microarray technology was used to evalu…	Journal Article	eng	PMC4504115	10.7150/jca.12251		30.3964	0.791074	-11.8328	Epigenomic cell regulation	105
25953448	2015	Tumori	Xue, Fei;Shen, Rui;Chen, Xianzhen	Analysis of gene profiles in glioma cells identifies potential genes, miRNAs, and target sites of migratory cells.	AIMS: To explore the potential molecular mechanisms involved in migratory glioma cells.METHODS: The gene expression profiles of GSE28167, employing human malignant glioma U251MG cells cultured on strictly aligned versus randomly oriented electrospun nanofibers of polycaprolactone, were downloaded from the Gene Expression Omnibus database. Gene differential expression analysis was carried out by t…	Journal Article	eng		10.5301/tj.5000226	Brain Neoplasms;Cell Movement;Cyclic Nucleotide Phosphodiesterases, Type 4;Cyclin D1;Dystrophin-Associated Proteins;GPI-Linked Proteins;Gene Expression Profiling;Gene Expression Regulation, Neoplastic;Glioma;Humans;Intracellular Signaling Peptides and Proteins;MicroRNAs;Nerve Tissue Proteins;Neuropeptides;Receptor, Platelet-Derived Growth Factor alpha;SOXC Transcription Factors;Signal Transductio…	30.2957	0.418865	-5.59257	Epigenomic cell regulation	105
25807141	2015	PloS one	Edward, Deepak P;Alkatan, Hind;Rafiq, Qundeel;Eberhart, Charles;Al Mesfer, Saleh;Ghazi, Nicola;Al Safieh, Leen;Kondkar, Altaf A;Abu Amero, Khaled K	MicroRNA profiling in intraocular medulloepitheliomas.	PURPOSE: To study the differential expression of microRNA (miRNA) profiles between intraocular medulloepithelioma (ME) and normal control tissue (CT).MATERIAL AND METHODS: Total RNA was extracted from formalin fixed paraffin embedded (FFPE) intraocular ME (n=7) and from age matched ciliary body controls (n=8). The clinical history and phenotype was recorded. MiRNA profiles were determined using t…	Journal Article	eng	PMC4373864	10.1371/journal.pone.0121706	Adolescent;Case-Control Studies;Child;Child, Preschool;Down-Regulation;Female;Gene Expression Profiling;Humans;Infant;Male;MicroRNAs;NF-kappa B;Neuroectodermal Tumors, Primitive;Signal Transduction;Toll-Like Receptors;Transcriptome;Up-Regulation	32.409	-0.259507	-10.6982	Epigenomic cell regulation	105
25781272	2015	Proteomics	Yang, Bin;Wang, Shan;Zeng, Jiawei;Zhang, Yu;Ruan, Xiangbin;Han, Wei;Yin, Bin;Yuan, Jiangang;Qiang, Boqin;Ying, Wantao;Qian, Xiaohong;Peng, Xiaozhong	Proteomic screening and identification of microRNA-128 targets in glioma cells.	Brain-enriched miR-128 is repressed in glioma cells, and could inhibit the proliferation of gliomas by targeting genes such as E2F3a and BMI1. To identify more targets of miR-128 in glioblastoma multiforme, the pulse stable isotope labeling with amino acids in cell culture (pSILAC) technique was used to test its impact on whole protein synthesis in T98G glioma cells. We successfully identified 18…	Journal Article	eng		10.1002/pmic.201400128	3' Untranslated Regions;Base Sequence;Brain Neoplasms;Cell Line, Tumor;Gene Expression Regulation, Neoplastic;Gene Regulatory Networks;Glioma;HEK293 Cells;Humans;Immunoblotting;Isotope Labeling;MicroRNAs;Microscopy, Fluorescence;Proteome;Proteomics;RNA Interference;Reproducibility of Results;Reverse Transcriptase Polymerase Chain Reaction	37.746	1.12515	-2.9435	Epigenomic cell regulation	105
25768906	2015	Cell	Luna, Joseph M;Scheel, Troels K H;Danino, Tal;Shaw, Katharina S;Mele, Aldo;Fak, John J;Nishiuchi, Eiko;Takacs, Constantin N;Catanese, Maria Teresa;de Jong, Ype P;Jacobson, Ira M;Rice, Charles M;Darnell, Robert B	Hepatitis C virus RNA functionally sequesters miR-122.	Hepatitis C virus (HCV) uniquely requires the liver-specific microRNA-122 for replication, yet global effects on endogenous miRNA targets during infection are unexplored. Here, high-throughput sequencing and crosslinking immunoprecipitation (HITS-CLIP) experiments of human Argonaute (AGO) during HCV infection showed robust AGO binding on the HCV 5'UTR at known and predicted miR-122 sites. On the …	Journal Article	eng	PMC4386883	10.1016/j.cell.2015.02.025	Argonaute Proteins;Base Sequence;Cell Line, Tumor;Eukaryotic Initiation Factors;Hepacivirus;Hepatitis C;Humans;Liver;MicroRNAs;Molecular Sequence Data;RNA, Viral;Virus Replication	37.8672	-0.992833	-4.30954	Epigenomic cell regulation	105
25452577	2014	Cerebral cortex (New York, N.Y. : 1991)	Dombkowski, Alan A;Batista, Carlos E;Cukovic, Daniela;Carruthers, Nicholas J;Ranganathan, Ramya;Shukla, Upasana;Stemmer, Paul M;Chugani, Harry T;Chugani, Diane C	Cortical Tubers: Windows into Dysregulation of Epilepsy Risk and Synaptic Signaling Genes by MicroRNAs.	Tuberous sclerosis complex (TSC) is a multisystem genetic disorder caused by mutations in the TSC1 and TSC2 genes. Over 80% of TSC patients are affected by epilepsy, but the molecular events contributing to seizures in TSC are not well understood. Recent reports have demonstrated that the brain is enriched with microRNA activity, and they are critical in neural development and function. However, …	Journal Article	eng	PMC4737604	10.1093/cercor/bhu276	Brain;Child;Child, Preschool;Chromatography, Liquid;Drug Resistant Epilepsy;Female;Humans;Male;MicroRNAs;Microarray Analysis;NF-kappa B;Proteome;Real-Time Polymerase Chain Reaction;Risk;Synapses;Tandem Mass Spectrometry;Tuberous Sclerosis;Tuberous Sclerosis Complex 1 Protein;Tumor Suppressor Protein p53;Tumor Suppressor Proteins	32.6787	1.0065	-1.98282	Epigenomic cell regulation	105
25348569	2014	Bulletin of experimental biology and medicine	Koshkin, F A;Chistyakov, D A;Nikitin, A G;Konovalov, A N;Potapov, A A;Usachyov, D Yu;Pitskhelauri, D I;Kobyakov, G L;Shishkina, L V;Chekhonin, V P	Profile of microRNA expression in brain tumors of different malignancy.	The expression profiles of 10 mature microRNA (7, 10a, 17, 20a, 21, 23a, 26a, 137, 222) in biopsy specimens of gliomas of different malignancy were studied by the real time PCR with SYBR Green I fluorescent stain. The expression of microRNA-21 increased significantly, while that of microRNA-137 decreased, depending on the tumor malignancy. The expression of microRNA-9, -17, -20a, -23a, -26a was s…	Journal Article	eng		10.1007/s10517-014-2669-8	Biomarkers, Tumor;DNA Primers;Gene Expression Regulation, Neoplastic;Glioma;Humans;MicroRNAs;Organic Chemicals;Real-Time Polymerase Chain Reaction;Reverse Transcriptase Polymerase Chain Reaction;Statistics, Nonparametric;Transcriptome	30.8157	1.01309	-2.91659	Epigenomic cell regulation	105
25240799	2014	Nature structural &amp; molecular biology	Kim, Kee K;Yang, Yanqin;Zhu, Jun;Adelstein, Robert S;Kawamoto, Sachiyo	Rbfox3 controls the biogenesis of a subset of microRNAs.	RNA-binding proteins (RBPs) regulate numerous aspects of gene expression; thus, identification of their endogenous targets is important for understanding their cellular functions. Here we identified transcriptome-wide targets of Rbfox3 in neuronally differentiated P19 cells and mouse brain by using photoactivatable ribonucleoside-enhanced cross-linking and immunoprecipitation (PAR-CLIP). Although…	Journal Article	eng	PMC4189996	10.1038/nsmb.2892	Animals;Binding Sites;Cell Line, Tumor;DNA-Binding Proteins;Immunoprecipitation;Mice;MicroRNAs;Nerve Tissue Proteins;Nuclear Proteins;Nucleotide Motifs;RNA Interference;RNA Precursors;RNA Processing, Post-Transcriptional;RNA Splicing;RNA, Small Interfering;RNA-Binding Proteins	31.0064	-0.328303	-11.0671	Epigenomic cell regulation	105
25149532	2014	Oncotarget	Babae, Negar;Bourajjaj, Meriem;Liu, Yijia;Van Beijnum, Judy R;Cerisoli, Francesco;Scaria, Puthupparampil V;Verheul, Mark;Van Berkel, Maaike P;Pieters, Ebel H E;Van Haastert, Rick J;Yousefi, Afrouz;Mastrobattista, Enrico;Storm, Gert;Berezikov, Eugene;Cuppen, Edwin;Woodle, Martin;Schaapveld, Roel Q J;Prevost, Gregoire P;Griffioen, Arjan W;Van Noort, Paula I;Schiffelers, Raymond M	Systemic miRNA-7 delivery inhibits tumor angiogenesis and growth in murine xenograft glioblastoma.	Tumor-angiogenesis is the multi-factorial process of sprouting of endothelial cells (EC) into micro-vessels to provide tumor cells with nutrients and oxygen. To explore miRNAs as therapeutic angiogenesis-inhibitors, we performed a functional screen to identify miRNAs that are able to decrease EC viability. We identified miRNA-7 (miR-7) as a potent negative regulator of angiogenesis. Introduction …	Journal Article	eng	PMC4196156	10.18632/oncotarget.2235	Animals;Cell Proliferation;Chick Embryo;Female;Genetic Therapy;Glioblastoma;Human Umbilical Vein Endothelial Cells;Humans;Male;Mice;Mice, Inbred A;Mice, Nude;MicroRNAs;Neovascularization, Pathologic;Random Allocation;Transfection;Xenograft Model Antitumor Assays	36.129	0.121626	-5.40783	Epigenomic cell regulation	105
25129238	2014	BMC genomics	Agrawal, Rahul;Pandey, Priyatama;Jha, Prerana;Dwivedi, Vivek;Sarkar, Chitra;Kulshreshtha, Ritu	Hypoxic signature of microRNAs in glioblastoma: insights from small RNA deep sequencing.	BACKGROUND: Hypoxia is a critical aspect of the glioma microenvironment and has been associated with poor prognosis and resistance to various therapies. However, the mechanisms responsible for hypoxic survival of glioma cells remain unclear. Recent studies strongly suggest that microRNAs act as critical mediators of the hypoxic response. We thus hypothesized their prominent role in hypoxia resist…	Journal Article	eng	PMC4148931	10.1186/1471-2164-15-686	Antigens, Neoplasm;Base Sequence;Binding Sites;Carbonic Anhydrase IX;Carbonic Anhydrases;Cell Hypoxia;Cell Line, Tumor;Drug Resistance, Neoplasm;Gene Expression Regulation, Neoplastic;Glioblastoma;High-Throughput Nucleotide Sequencing;Humans;Hypoxia-Inducible Factor 1, alpha Subunit;MicroRNAs;RNA Interference;Response Elements;Sequence Analysis, RNA;Transcriptional Activation;Transcriptome;Vascul…	38.731	1.32365	-5.68037	Epigenomic cell regulation	105
25079112	2014	BMC medical genomics	Joung, Je-Gun;Kim, Dokyoon;Lee, Su Yeon;Kang, Hwa Jung;Kim, Ju Han	Integrated analysis of microRNA-target interactions with clinical outcomes for cancers.	BACKGROUND: Clinical statement alone is not enough to predict the progression of disease. Instead, the gene expression profiles have been widely used to forecast clinical outcomes. Many genes related to survival have been identified, and recently miRNA expression signatures predicting patient survival have been also investigated for several cancers. However, miRNAs and their target genes associat…	Journal Article	eng	PMC4101396	10.1186/1755-8794-7-S1-S10	Computational Biology;Female;Glioblastoma;Humans;MicroRNAs;Ovarian Neoplasms;Prognosis;Survival Analysis;Transcriptome	30.8018	0.462535	-10.7399	Epigenomic cell regulation	105
25027403	2014	Tumour biology : the journal of the International Society for Oncodevelopmental Biology and Medicine	Liu, Zhiguo;Liu, Yuguang;Li, Lianling;Xu, Zhenkuan;Bi, Baibin;Wang, Yunyan;Li, Jian Yi	MiR-7-5p is frequently downregulated in glioblastoma microvasculature and inhibits vascular endothelial cell proliferation by targeting RAF1.	The aberrant expression of microRNAs (miRNAs) is always associated with tumor development and progression. Microvascular proliferation is one of the unique pathologic features of glioblastoma (GBM) . In this study, the microvasculature from GBM or normal brain tissue derived from neurosurgeries was purified and total RNA was isolated from purified microvasculature. The difference of miRNA express…	Journal Article	eng		10.1007/s13277-014-2318-x	Adult;Aged;Brain Neoplasms;Cell Proliferation;Down-Regulation;Endothelial Cells;Female;Gene Expression Regulation, Neoplastic;Genes, Tumor Suppressor;Glioblastoma;Humans;Male;MicroRNAs;Microvessels;Middle Aged;Oligonucleotide Array Sequence Analysis;Proto-Oncogene Proteins c-raf;Real-Time Polymerase Chain Reaction;Transcriptome	36.4219	1.81104	-4.43587	Epigenomic cell regulation	105
24888363	2014	Molecular psychiatry	Strazisar, M;Cammaerts, S;van der Ven, K;Forero, D A;Lenaerts, A-S;Nordin, A;Almeida-Souza, L;Genovese, G;Timmerman, V;Liekens, A;De Rijk, P;Adolfsson, R;Callaerts, P;Del-Favero, J	MIR137 variants identified in psychiatric patients affect synaptogenesis and neuronal transmission gene sets.	Sequence analysis of 13 microRNA (miRNA) genes expressed in the human brain and located in genomic regions associated with schizophrenia and/or bipolar disorder, in a northern Swedish patient/control population, resulted in the discovery of two functional variants in the MIR137 gene. On the basis of their location and the allele frequency differences between patients and controls, we explored the…	Journal Article	eng		10.1038/mp.2014.53	Cell Line, Tumor;Female;Gene Expression Profiling;Gene Frequency;Green Fluorescent Proteins;Humans;Male;Mental Disorders;MicroRNAs;Microarray Analysis;Minisatellite Repeats;Models, Molecular;Neuroblastoma;Neurogenesis;Oligonucleotide Array Sequence Analysis;Sweden;Synaptic Transmission;Transfection	32.1728	0.0197567	-6.92156	Epigenomic cell regulation	105
24832085	2014	Carcinogenesis	Hsieh, Tsung-Han;Chien, Chen-Li;Lee, Yu-Hsiu;Lin, Chen-I;Hsieh, Jui-Yu;Chao, Meng-En;Liu, Da-Jung;Chu, Shing-Shiung;Chen, Wan;Lin, Shih-Chieh;Ho, Donald Ming-Tak;Liu, Ren-Shyan;Lin, Chi-Hung;Wong, Tai-Tong;Wang, Hsei-Wei	Downregulation of SUN2, a novel tumor suppressor, mediates miR-221/222-induced malignancy in central nervous system embryonal tumors.	Embryonal tumors of the central nervous system represent a highly malignant tumor group of medulloblastoma (MB), atypical teratoid/rhabdoid tumor (AT/RT) and primitive neuroectodermal tumor that frequently afflict children. AT/RT is often misdiagnosed as MB/primitive neuroectodermal tumor but with higher recurrence and lower survival rates. Pathogenesis of AT/RT is largely unknown. In this study,…	Journal Article	eng		10.1093/carcin/bgu105	Animals;Brain Neoplasms;Cerebellar Neoplasms;Child;Child, Preschool;Down-Regulation;Female;Gene Expression Regulation, Neoplastic;Genes, Tumor Suppressor;Humans;Intracellular Signaling Peptides and Proteins;Male;Medulloblastoma;Membrane Proteins;Mice, Inbred NOD;MicroRNAs;Neoplasms, Germ Cell and Embryonal;Neuroectodermal Tumors, Primitive;Rhabdoid Tumor;Xenograft Model Antitumor Assays	35.2418	0.93943	-2.04615	Epigenomic cell regulation	105
24817689	2014	Neuromolecular medicine	Henriksen, Michael;Johnsen, Kasper Bendix;Olesen, Pia;Pilgaard, Linda;Duroux, Meg	MicroRNA expression signatures and their correlation with clinicopathological features in glioblastoma multiforme.	The increasing interest in identifying molecular biomarkers to determine patient prognosis in glioblastoma multiforme (GBM) has resulted in several microRNA (miRNA)-based signatures able to predict progression-free and overall survival. However, the coherency between these signatures is small, and correlations to clinicopathological features other than survival are seldom seen. The aim of this st…	Journal Article	eng		10.1007/s12017-014-8309-7	Adult;Aged;Aged, 80 and over;Brain Neoplasms;Cell Movement;Exosomes;Female;Gene Expression Regulation, Neoplastic;Genes, Neoplasm;Glioblastoma;Humans;Kaplan-Meier Estimate;Male;Mesoderm;MicroRNAs;Middle Aged;Neoplasm Invasiveness;Neoplasm Proteins;Paracrine Communication;Prognosis;RNA, Neoplasm;Risk;Transcriptome	30.1839	1.36056	-9.92132	Epigenomic cell regulation	105
24778252	2014	Proceedings of the National Academy of Sciences of the United States of America	Li, Shitao;Wang, Lingyan;Fu, Bishi;Berman, Michael A;Diallo, Alos;Dorf, Martin E	TRIM65 regulates microRNA activity by ubiquitination of TNRC6.	MicroRNAs (miRNAs) are small evolutionarily conserved regulatory RNAs that modulate mRNA stability and translation in a wide range of cell types. MiRNAs are involved in a broad array of biological processes, including cellular proliferation, differentiation, and apoptosis. To identify previously unidentified regulators of miRNA, we initiated a systematic discovery-type proteomic analysis of the m…	Journal Article	eng	PMC4024878	10.1073/pnas.1322545111	Arabidopsis Proteins;Autoantigens;Glioblastoma;HEK293 Cells;HeLa Cells;Humans;Intramolecular Transferases;Lung Neoplasms;MicroRNAs;Proteomics;RNA Stability;RNA-Binding Proteins;RNA-Induced Silencing Complex;Tripartite Motif Proteins;Ubiquitin-Protein Ligases;Ubiquitination	30.9841	-0.338163	-11.0396	Epigenomic cell regulation	105
24609385	2014	Nucleic acids research	Li, Yue;Liang, Cheng;Wong, Ka-Chun;Jin, Ke;Zhang, Zhaolei	Inferring probabilistic miRNA-mRNA interaction signatures in cancers: a role-switch approach.	Aberrant microRNA (miRNA) expression is implicated in tumorigenesis. The underlying mechanisms are unclear because the regulations of each miRNA on potentially hundreds of mRNAs are sample specific. We describe a novel approach to infer Probabilistic MiRNA-mRNA Interaction Signature ('ProMISe') from a single pair of miRNA-mRNA expression profile. Our model considers mRNA and miRNA competition as …	Journal Article	eng	PMC4027195	10.1093/nar/gku182	Algorithms;Biomarkers, Tumor;Breast Neoplasms;Cell Line, Tumor;Female;Gene Expression;Gene Expression Regulation, Neoplastic;Gene Regulatory Networks;HEK293 Cells;Humans;MicroRNAs;Models, Genetic;Models, Statistical;Oncogenes;RNA Interference;RNA, Messenger;Thyroid Neoplasms;Transcriptome	31.3333	-0.0184131	-9.98186	Epigenomic cell regulation	105
24591819	2014	Drug design, development and therapy	Kim, Yong-Wan;Kim, Eun Young;Jeon, Doin;Liu, Juinn-Lin;Kim, Helena Suhyun;Choi, Jin Woo;Ahn, Woong Shick	Differential microRNA expression signatures and cell type-specific association with Taxol resistance in ovarian cancer cells.	Paclitaxel (Taxol) resistance remains a major obstacle for the successful treatment of ovarian cancer. MicroRNAs (miRNAs) have oncogenic and tumor suppressor activity and are associated with poor prognosis phenotypes. miRNA screenings for this drug resistance are needed to estimate the prognosis of the disease and find better drug targets. miRNAs that were differentially expressed in Taxol-resist…	Journal Article	eng	PMC3938445	10.2147/DDDT.S51969	Cell Line, Tumor;Drug Resistance, Neoplasm;Female;Gene Expression Regulation, Neoplastic;Humans;MicroRNAs;Ovarian Neoplasms;Paclitaxel;Transcriptome	37.1507	0.115059	-7.04572	Epigenomic cell regulation	105
24438238	2014	Journal of experimental &amp; clinical cancer research : CR	Li, Rui;Gao, Kaiming;Luo, Hui;Wang, Xiefeng;Shi, Yan;Dong, Qingsheng;Luan, WenKang;You, Yongping	Identification of intrinsic subtype-specific prognostic microRNAs in primary glioblastoma.	BACKGROUND: Glioblastoma multiforme (GBM) is the most malignant type of glioma. Integrated classification based on mRNA expression microarrays and whole-genome methylation subdivides GBM into five subtypes: Classical, Mesenchymal, Neural, Proneural-CpG island methylator phenotype (G-CIMP) and Proneural-non G-CIMP. Biomarkers that can be used to predict prognosis in each subtype have not been syst…	Journal Article	eng	PMC3917617	10.1186/1756-9966-33-9	Biomarkers, Tumor;Cohort Studies;Glioblastoma;Humans;Kaplan-Meier Estimate;MicroRNAs;Molecular Diagnostic Techniques;Oligonucleotide Array Sequence Analysis;Prognosis;Risk;Transcriptome	33.7831	1.90613	-6.37498	Epigenomic cell regulation	105
24013584	2013	PloS one	Zhi, Feng;Zhou, Guangxin;Shao, Naiyuan;Xia, Xiwei;Shi, Yimin;Wang, Qiang;Zhang, Yi;Wang, Rong;Xue, Lian;Wang, Suinuan;Wu, Sujia;Peng, Ya;Yang, Yilin	miR-106a-5p inhibits the proliferation and migration of astrocytoma cells and promotes apoptosis by targeting FASTK.	Astrocytomas are common malignant intracranial tumors that comprise the majority of adult primary central nervous system tumors. MicroRNAs (miRNAs) are small, non-coding RNAs (20-24 nucleotides) that post-transcriptionally modulate gene expression by negatively regulating the stability or translational efficiency of their target mRNAs. In our previous studies, we found that the downregulation of …	Journal Article	eng	PMC3754986	10.1371/journal.pone.0072390	3' Untranslated Regions;Apoptosis;Astrocytoma;Base Sequence;Binding Sites;Brain Neoplasms;Cell Line, Tumor;Cell Movement;Cell Proliferation;Cell Survival;Female;Gene Expression Regulation, Neoplastic;Genes, Tumor Suppressor;Humans;Kaplan-Meier Estimate;Male;MicroRNAs;Middle Aged;Oligonucleotide Array Sequence Analysis;Protein-Serine-Threonine Kinases;RNA Interference;Transcriptome	37.0234	1.73844	-1.88517	Epigenomic cell regulation	105
23869555	2013	Journal of proteome research	Hu, Chia-Wei;Tseng, Chien-Wei;Chien, Chih-Wei;Huang, Hsuan-Cheng;Ku, Wei-Chi;Lee, Shyh-Jye;Chen, Yu-Ju;Juan, Hsueh-Fen	Quantitative proteomics reveals diverse roles of miR-148a from gastric cancer progression to neurological development.	MicroRNAs (miRNAs) are noncoding RNAs that control gene expression either by degradation of mRNAs or inhibition of protein translation. miR-148a has been reported to have the impacts on tumor progression. Here, a quantitative proteomics combined with stable isotope labeling was applied to identify the global profile of miR-148a-regulated downstream proteins. The data have been deposited to the Pr…	Journal Article	eng		10.1021/pr400302w	Alzheimer Disease;Animals;Base Sequence;Brain;Case-Control Studies;Cell Line, Tumor;Disease Progression;Gene Expression Regulation, Neoplastic;Humans;MicroRNAs;Parkinson Disease;Proteomics;RNA Interference;Sequence Homology, Nucleic Acid;Spinal Cord;Stomach Neoplasms;Transcriptome;Zebrafish	38.4293	0.370504	-3.65465	Epigenomic cell regulation	105
23822153	2013	Biomarkers : biochemical indicators of exposure, response, and susceptibility to chemicals	Bekris, Lynn M;Lutz, Franziska;Montine, Thomas J;Yu, Chang En;Tsuang, Debby;Peskind, Elaine R;Leverenz, James B	MicroRNA in Alzheimer's disease: an exploratory study in brain, cerebrospinal fluid and plasma.	MicroRNA (miRNA) may be potential biomarkers of Alzheimer's disease (AD). The objective of this investigation was to demonstrate that miRNAs in human brain or biofluids are differentially expressed according to disease status, tissue type, neuritic plaque score or Braak stage. Post-mortem brain (PMB) miRNA were profiled using arrays and validated using quantitative RT-PCR (qRT-PCR). Five qRT-PCR-…	Journal Article	eng	PMC3967870	10.3109/1354750X.2013.814073	Aged;Aged, 80 and over;Alzheimer Disease;Area Under Curve;Biomarkers;Brain;Case-Control Studies;Cell Line, Tumor;Female;Gene Expression Profiling;Humans;Male;MicroRNAs;Middle Aged;RNA Interference;ROC Curve;Transcriptome	31.6927	0.568652	-10.8738	Epigenomic cell regulation	105
23683741	2013	Journal of clinical neuroscience : official journal of the Neurosurgical Society of Australasia	Hou, Shuang-xing;Ding, Bo-jun;Li, Hong-zeng;Wang, Li;Xia, Feng;Du, Fang;Liu, Li-juan;Liu, Yong-hong;Liu, Xue-dong;Jia, Jun-feng;Li, Li;Wu, Zhong-liang;Zhao, Gang;Zhang, Zhi-guo;Deng, Yan-chun	Identification of microRNA-205 as a potential prognostic indicator for human glioma.	Altered microRNA-205 (miR-205) expression has been found in glioma tissue samples and cell lines; however, the clinical significance of this is unclear. The aim of this study was to confirm the miR-205 expression pattern in human glioma and to investigate its clinical relevance. Quantitative reverse-transcription polymerase chain reaction assays showed that miR-205 expression was significantly lo…	Journal Article	eng		10.1016/j.jocn.2012.10.015	Adult;Biomarkers, Tumor;Brain Neoplasms;Disease Progression;Down-Regulation;Female;Glioma;Humans;Kaplan-Meier Estimate;Karnofsky Performance Status;Male;MicroRNAs;Middle Aged;Prognosis;Proportional Hazards Models;Reverse Transcriptase Polymerase Chain Reaction;Transcriptome	39.3619	1.42756	-2.72078	Epigenomic cell regulation	105
23650073	2013	Glia	Hutchison, Emmette R;Kawamoto, Elisa M;Taub, Dennis D;Lal, Ashish;Abdelmohsen, Kotb;Zhang, Yongqing;Wood, William H;Lehrmann, Elin;Camandola, Simonetta;Becker, Kevin G;Gorospe, Myriam;Mattson, Mark P	Evidence for miR-181 involvement in neuroinflammatory responses of astrocytes.	Inflammation is a common component of acute injuries of the central nervous system (CNS) such as ischemia, and degenerative disorders such as Alzheimer's disease. Glial cells play important roles in local CNS inflammation, and an understanding of the roles for microRNAs in glial reactivity in injury and disease settings may therefore lead to the development of novel therapeutic interventions. Her…	Journal Article	eng	PMC4624280	10.1002/glia.22483	Animals;Astrocytes;Biotinylation;Brain-Derived Neurotrophic Factor;Cells, Cultured;Cerebral Cortex;Cytokines;L-Lactate Dehydrogenase;Lipopolysaccharides;Male;Methyl-CpG-Binding Protein 2;Mice;Mice, Knockout;MicroRNAs;Neuroimmunomodulation;Neurons;Receptors, Tumor Necrosis Factor, Type I;Receptors, Tumor Necrosis Factor, Type II;Transfection;X-Linked Inhibitor of Apoptosis Protein	38.6877	-0.934229	-3.12968	Epigenomic cell regulation	105
23275554	2013	Nucleic acids research	Suzuki, Hiroshi I;Mihira, Hajime;Watabe, Tetsuro;Sugimoto, Koichi;Miyazono, Kohei	Widespread inference of weighted microRNA-mediated gene regulation in cancer transcriptome analysis.	MicroRNAs (miRNAs) comprise a gene-regulatory network through sequence complementarity with target mRNAs. Previous studies have shown that mammalian miRNAs decrease many target mRNA levels and reduce protein production predominantly by target mRNA destabilization. However, it has not yet been fully assessed whether this scheme is widely applicable to more realistic conditions with multiple miRNA …	Journal Article	eng	PMC3597654	10.1093/nar/gks1439	Gene Expression Profiling;Gene Expression Regulation, Neoplastic;Glioblastoma;Humans;Kaplan-Meier Estimate;MicroRNAs;Models, Genetic;Oligonucleotide Array Sequence Analysis;RNA Interference;RNA Stability;Transcriptome	31.1254	-0.0102868	-11.4035	Epigenomic cell regulation	105
23227829	2012	Brain pathology (Zurich, Switzerland)	Li, Kay Ka-Wai;Pang, Jesse Chung-Sean;Lau, Kin-Mang;Zhou, Liangfu;Mao, Ying;Wang, Yin;Poon, Wai-Sang;Ng, Ho-Keung	MiR-383 is downregulated in medulloblastoma and targets peroxiredoxin 3 (PRDX3).	Accumulating evidence suggests that microRNAs (miRNAs) are over- or under-expressed in tumors, and abnormalities in miRNA expression may contribute to carcinogenesis. MiR-383 was previously identified as one of the under-expressed miRNAs in medulloblastoma (MB) by miRNA expression profiling. Quantitative reverse transcription polymerase chain reaction (RT-PCR)-based miRNA assays showed an enrichm…	Journal Article	eng		10.1111/bpa.12014	Adolescent;Adult;Apoptosis;Azacitidine;Cell Cycle;Cell Line, Tumor;Cell Survival;Cerebellar Neoplasms;Child;Child, Preschool;Decitabine;Down-Regulation;Enzyme Inhibitors;Female;Gene Expression Profiling;Gene Expression Regulation, Neoplastic;Humans;Hydroxamic Acids;Male;Medulloblastoma;MicroRNAs;Peroxiredoxin III;RNA Interference;Young Adult	38.0458	0.0929372	-5.99935	Epigenomic cell regulation	105
23183822	2012	Oncotarget	Asuthkar, Swapna;Velpula, Kiran Kumar;Chetty, Chandramu;Gorantla, Bharathi;Rao, Jasti S	Epigenetic regulation of miRNA-211 by MMP-9 governs glioma cell apoptosis, chemosensitivity and radiosensitivity.	Glioblastoma multiforme (GBM) is the most aggressive brain cancer, and to date, no curative treatment has been developed. In this study, we report that miR-211, a microRNA predicted to target MMP-9, is suppressed in grade IV GBM specimens. Furthermore, we found that miR-211 suppression in GBM involves aberrant methylation-mediated epigenetic silencing of the miR-211 promoter. Indeed, we observed …	Journal Article	eng	PMC3717804	10.18632/oncotarget.683	Animals;Apoptosis;Brain Neoplasms;Cell Movement;CpG Islands;DNA Methylation;Down-Regulation;Epigenomics;Glioblastoma;Humans;Immunoblotting;Immunohistochemistry;Matrix Metalloproteinase 9;Mice;Mice, Nude;MicroRNAs;Promoter Regions, Genetic;Radiation Tolerance;Smad1 Protein;Transfection;Transforming Growth Factor beta;Xenograft Model Antitumor Assays	38.061	2.08771	-4.07304	Epigenomic cell regulation	105
23007860	2012	The Journal of pathology	Moore, Lynette M;Kivinen, Virpi;Liu, Yuexin;Annala, Matti;Cogdell, David;Liu, Xiuping;Liu, Chang-Gong;Sawaya, Raymond;Yli-Harja, Olli;Shmulevich, Ilya;Fuller, Gregory N;Zhang, Wei;Nykter, Matti	Transcriptome and small RNA deep sequencing reveals deregulation of miRNA biogenesis in human glioma.	Altered expression of oncogenic and tumour-suppressing microRNAs (miRNAs) is widely associated with tumourigenesis. However, the regulatory mechanisms underlying these alterations are poorly understood. We sought to shed light on the deregulation of miRNA biogenesis promoting the aberrant miRNA expression profiles identified in these tumours. Using sequencing technology to perform both whole-tran…	Journal Article	eng	PMC3857031	10.1002/path.4109	Brain Neoplasms;Cell Line, Tumor;Disease Progression;Gene Expression Profiling;Gene Knockdown Techniques;Gene Silencing;Glioblastoma;Glioma;Humans;MicroRNAs;Sequence Analysis, RNA;Survival Rate;Texas;Transcriptome	31.1081	-0.270637	-11.6002	Epigenomic cell regulation	105
22952847	2012	PloS one	Almog, Nava;Ma, Lili;Schwager, Christian;Brinkmann, Bastian G;Beheshti, Afshin;Vajkoczy, Peter;Folkman, Judah;Hlatky, Lynn;Abdollahi, Amir	Consensus micro RNAs governing the switch of dormant tumors to the fast-growing angiogenic phenotype.	Tumor dormancy refers to a critical stage in cancer development in which tumor cells remain occult for a prolonged period of time until they eventually progress and become clinically apparent. We previously showed that the switch of dormant tumors to fast-growth is angiogenesis dependent and requires a stable transcriptional reprogramming in tumor cells. Considering microRNAs (miRs) as master reg…	Journal Article	eng	PMC3432069	10.1371/journal.pone.0044001	Animals;Biomarkers, Tumor;CD11b Antigen;Cell Line, Tumor;Cell Proliferation;Disease Progression;Down-Regulation;Gastrointestinal Hormones;Humans;Male;Mice;MicroRNAs;Myeloid Cells;Neoplasm Staging;Neoplasms;Neovascularization, Pathologic;Neuropeptides;Phenotype;Transcriptome;Tumor Microenvironment	33.2819	0.16032	-1.2212	Epigenomic cell regulation	105
22750848	2012	Cancer discovery	Genovese, Giannicola;Ergun, Ayla;Shukla, Sachet A;Campos, Benito;Hanna, Jason;Ghosh, Papia;Quayle, Steven N;Rai, Kunal;Colla, Simona;Ying, Haoqiang;Wu, Chang-Jiun;Sarkar, Sharmistha;Xiao, Yonghong;Zhang, Jianhua;Zhang, Hailei;Kwong, Lawrence;Dunn, Katherine;Wiedemeyer, Wolf Ruprecht;Brennan, Cameron;Zheng, Hongwu;Rimm, David L;Collins, James J;Chin, Lynda	microRNA regulatory network inference identifies miR-34a as a novel regulator of TGF-β signaling in glioblastoma.	Leveraging The Cancer Genome Atlas (TCGA) multidimensional data in glioblastoma, we inferred the putative regulatory network between microRNA and mRNA using the Context Likelihood of Relatedness modeling algorithm. Interrogation of the network in context of defined molecular subtypes identified 8 microRNAs with a strong discriminatory potential between proneural and mesenchymal subtypes. Integrat…	Journal Article	eng	PMC3911772	10.1158/2159-8290.CD-12-0111	Animals;Cell Line, Tumor;Gene Expression Regulation, Neoplastic;Gene Regulatory Networks;Genes, Tumor Suppressor;Glioblastoma;Humans;Mice;MicroRNAs;Prognosis;Signal Transduction;Transforming Growth Factor beta	33.5678	1.39541	-2.47855	Epigenomic cell regulation	105
22411914	2012	Neuro-oncology	Andolfo, Immacolata;Liguori, Lucia;De Antonellis, Pasqualino;Cusanelli, Emilio;Marinaro, Federica;Pistollato, Francesca;Garzia, Livia;De Vita, Gennaro;Petrosino, Giuseppe;Accordi, Benedetta;Migliorati, Roberta;Basso, Giuseppe;Iolascon, Achille;Cinalli, Giuseppe;Zollo, Massimo	The micro-RNA 199b-5p regulatory circuit involves Hes1, CD15, and epigenetic modifications in medulloblastoma.	Micro-RNA (miR) 199b-5p targets Hes1 in medulloblastoma, one of the downstream effectors of both the canonical Notch and noncanonical Sonic Hedgehog pathways. In medulloblastoma patients, expression of miR-199b-5p is significantly decreased in metastatic cases, thus suggesting a downregulation mechanism. We studied this mechanism, which is mediated mostly by Hes1 and epigenetic promoter modificat…	Journal Article	eng	PMC3337299	10.1093/neuonc/nos002	Basic Helix-Loop-Helix Transcription Factors;Blotting, Western;Cell Proliferation;Cells, Cultured;Cerebellar Neoplasms;Child, Preschool;Chromatin Immunoprecipitation;CpG Islands;DNA Methylation;Epigenomics;Female;Flow Cytometry;Fucosyltransferases;Gene Expression Regulation, Neoplastic;Homeodomain Proteins;Humans;Infant;Kidney;Lewis X Antigen;Male;Medulloblastoma;MicroRNAs;Primary Cell Culture;Pr…	38.893	0.115768	-1.84662	Epigenomic cell regulation	105
22402744	2012	Acta neuropathologica	Weeraratne, Shyamal Dilhan;Amani, Vladimir;Teider, Natalia;Pierre-Francois, Jessica;Winter, Dominic;Kye, Min Jeong;Sengupta, Soma;Archer, Tenley;Remke, Marc;Bai, Alfa H C;Warren, Peter;Pfister, Stefan M;Steen, Judith A J;Pomeroy, Scott L;Cho, Yoon-Jae	Pleiotropic effects of miR-183~96~182 converge to regulate cell survival, proliferation and migration in medulloblastoma.	Medulloblastomas are the most common malignant brain tumors in children. Several large-scale genomic studies have detailed their heterogeneity, defining multiple subtypes with unique molecular profiles and clinical behavior. Increased expression of the miR-183~96~182 cluster of microRNAs has been noted in several subgroups, including the most clinically aggressive subgroup associated with genetic…	Journal Article	eng	PMC6172007	10.1007/s00401-012-0969-5	Apoptosis;Cell Cycle;Cell Line, Tumor;Cell Migration Assays;Cell Movement;Cell Proliferation;Cerebellar Neoplasms;Comet Assay;Computational Biology;Gene Expression Regulation, Neoplastic;Gene Knockdown Techniques;Humans;Medulloblastoma;MicroRNAs;Proteomics;Proto-Oncogene Proteins c-myc;Signal Transduction;Transfection	38.6989	0.340989	-2.10077	Epigenomic cell regulation	105
22294488	2012	Breast cancer research and treatment	Gravgaard, Karina H;Lyng, Maria B;Laenkholm, Anne-Vibeke;Søkilde, Rolf;Nielsen, Boye Schnack;Litman, Thomas;Ditzel, Henrik J	The miRNA-200 family and miRNA-9 exhibit differential expression in primary versus corresponding metastatic tissue in breast cancer.	Metastases are the major cause of cancer-related deaths, but the mechanisms of the metastatic process remain poorly understood. In recent years, the involvement of microRNAs (miRNAs) in cancer has become apparent, and the objective of this study was to identify miRNAs associated with breast cancer progression. Global miRNA expression profiling was performed on 47 tumor samples from 14 patients wi…	Journal Article	eng		10.1007/s10549-012-1969-9	Adenocarcinoma;Adult;Aged;Analysis of Variance;Brain Neoplasms;Breast Neoplasms;Cadherins;Cluster Analysis;Female;Gene Expression;Homeodomain Proteins;Humans;In Situ Hybridization;Liver Neoplasms;Lymphatic Metastasis;MicroRNAs;Middle Aged;Real-Time Polymerase Chain Reaction;Transcription Factors;Transcriptome;Zinc Finger E-box-Binding Homeobox 1	33.2691	0.413721	-10.312	Epigenomic cell regulation	105
22053178	2011	PloS one	Costa, Fabricio F;Bischof, Jared M;Vanin, Elio F;Lulla, Rishi R;Wang, Min;Sredni, Simone T;Rajaram, Veena;Bonaldo, Maria de Fátima;Wang, Deli;Goldman, Stewart;Tomita, Tadanori;Soares, Marcelo B	Identification of microRNAs as potential prognostic markers in ependymoma.	INTRODUCTION: We have examined expression of microRNAs (miRNAs) in ependymomas to identify molecular markers of value for clinical management. miRNAs are non-coding RNAs that can block mRNA translation and affect mRNA stability. Changes in the expression of miRNAs have been correlated with many human cancers.MATERIALS AND METHODS: We have utilized TaqMan Low Density Arrays to evaluate the express…	Journal Article	eng	PMC3203863	10.1371/journal.pone.0025114	Adolescent;Biomarkers, Tumor;Case-Control Studies;Child;Child, Preschool;Computational Biology;Ependymoma;Female;Gene Expression Profiling;Gene Expression Regulation, Neoplastic;Humans;Infant;Male;MicroRNAs;Multivariate Analysis;Prognosis;Proportional Hazards Models;Regression Analysis;Survival Analysis	33.2681	-0.238249	-11.0702	Epigenomic cell regulation	105
21931765	2011	PloS one	de Antonellis, Pasqualino;Medaglia, Chiara;Cusanelli, Emilio;Andolfo, Immacolata;Liguori, Lucia;De Vita, Gennaro;Carotenuto, Marianeve;Bello, Annamaria;Formiggini, Fabio;Galeone, Aldo;De Rosa, Giuseppe;Virgilio, Antonella;Scognamiglio, Immacolata;Sciro, Manuela;Basso, Giuseppe;Schulte, Johannes H;Cinalli, Giuseppe;Iolascon, Achille;Zollo, Massimo	MiR-34a targeting of Notch ligand delta-like 1 impairs CD15+/CD133+ tumor-propagating cells and supports neural differentiation in medulloblastoma.	BACKGROUND: Through negative regulation of gene expression, microRNAs (miRNAs) can function as oncosuppressors in cancers, and can themselves show altered expression in various tumor types. Here, we have investigated medulloblastoma tumors (MBs), which arise from an early impairment of developmental processes in the cerebellum, where Notch signaling is involved in many of the cell-fate-determinin…	Journal Article	eng	PMC3171461	10.1371/journal.pone.0024584	AC133 Antigen;Animals;Antigens, CD;Apoptosis;Calcium-Binding Proteins;Cell Differentiation;Cell Line, Tumor;Cell Proliferation;Glycoproteins;Humans;Intercellular Signaling Peptides and Proteins;Lewis X Antigen;Medulloblastoma;Membrane Proteins;Mice;MicroRNAs;Neurons;Peptides;Signal Transduction;Tumor Suppressor Protein p53	37.2003	0.837606	-3.26496	Epigenomic cell regulation	105
21912681	2011	PloS one	Skalsky, Rebecca L;Cullen, Bryan R	Reduced expression of brain-enriched microRNAs in glioblastomas permits targeted regulation of a cell death gene.	Glioblastoma is a highly aggressive malignant tumor involving glial cells in the human brain. We used high-throughput sequencing to comprehensively profile the small RNAs expressed in glioblastoma and non-tumor brain tissues. MicroRNAs (miRNAs) made up the large majority of small RNAs, and we identified over 400 different cellular pre-miRNAs. No known viral miRNAs were detected in any of the samp…	Journal Article	eng	PMC3166303	10.1371/journal.pone.0024248	Base Sequence;Brain;Cell Death;Cell Line, Tumor;DNA Primers;Down-Regulation;Genes, Transgenic, Suicide;Genetic Therapy;Genetic Variation;Genetic Vectors;Glioblastoma;Herpesvirus 1, Human;High-Throughput Nucleotide Sequencing;Humans;MicroRNAs;Neurons;Organ Specificity;RNA Editing;Reproducibility of Results;Thymidine Kinase;Transcriptome	36.8151	0.194938	-7.15388	Epigenomic cell regulation	105
21857646	2011	The EMBO journal	Schraivogel, Daniel;Weinmann, Lasse;Beier, Dagmar;Tabatabai, Ghazaleh;Eichner, Alexander;Zhu, Jia Yun;Anton, Martina;Sixt, Michael;Weller, Michael;Beier, Christoph P;Meister, Gunter	CAMTA1 is a novel tumour suppressor regulated by miR-9/9* in glioblastoma stem cells.	Cancer stem cells or cancer initiating cells are believed to contribute to cancer recurrence after therapy. MicroRNAs (miRNAs) are short RNA molecules with fundamental roles in gene regulation. The role of miRNAs in cancer stem cells is only poorly understood. Here, we report miRNA expression profiles of glioblastoma stem cell-containing CD133(+) cell populations. We find that miR-9, miR-9(*) (re…	Journal Article	eng	PMC3199389	10.1038/emboj.2011.301	AC133 Antigen;Animals;Antigens, CD;Atrial Natriuretic Factor;Calcium-Binding Proteins;Cell Differentiation;Cell Line, Tumor;Cohort Studies;Gene Expression Regulation, Neoplastic;Glioblastoma;Glycoproteins;Humans;Male;Mice;Mice, Nude;MicroRNAs;Neoplastic Stem Cells;Peptides;Trans-Activators;Transcriptome;Tumor Suppressor Proteins	38.7338	0.127696	-4.86819	Epigenomic cell regulation	105
21737610	2011	Cancer genomics &amp; proteomics	Delfino, K R;Serão, N V L;Southey, B R;Rodriguez-Zas, S L	Therapy-, gender- and race-specific microRNA markers, target genes and networks related to glioblastoma recurrence and survival.	AIM: To identify and study targets of microRNA biomarkers of glioblastoma survival across events (death and recurrence) and phases (life expectancy or post-diagnostic) using functional and network analyses.MATERIALS AND METHODS: microRNAs associated with glioblastoma survival within and across race, gender, recurrence, and therapy cohorts were identified using 253 individuals, 534 microRNAs, Cox …	Journal Article	eng	PMC3321577		Biomarkers, Tumor;Cohort Studies;Discriminant Analysis;European Continental Ancestry Group;Female;Glioblastoma;Humans;Male;MicroRNAs;Middle Aged;Neoplasm Recurrence, Local;Receptors, G-Protein-Coupled	33.2131	1.28313	-2.287	Epigenomic cell regulation	105
21655185	2011	PloS one	Lages, Elodie;Guttin, Audrey;El Atifi, Michèle;Ramus, Claire;Ipas, Hélène;Dupré, Isabelle;Rolland, Delphine;Salon, Caroline;Godfraind, Catherine;deFraipont, Florence;Dhobb, Mehdi;Pelletier, Laurent;Wion, Didier;Gay, Emmanuel;Berger, François;Issartel, Jean-Paul	MicroRNA and target protein patterns reveal physiopathological features of glioma subtypes.	Gliomas such as oligodendrogliomas (ODG) and glioblastomas (GBM) are brain tumours with different clinical outcomes. Histology-based classification of these tumour types is often difficult. Therefore the first aim of this study was to gain microRNA data that can be used as reliable signatures of oligodendrogliomas and glioblastomas. We investigated the levels of 282 microRNAs using membrane-array…	Journal Article	eng	PMC3105101	10.1371/journal.pone.0020600	Blotting, Western;Cell Hypoxia;Cell Line, Tumor;CpG Islands;DNA Methylation;Glioma;Heterogeneous-Nuclear Ribonucleoproteins;Humans;In Vitro Techniques;MicroRNAs;Polymerase Chain Reaction;Polypyrimidine Tract-Binding Protein;STAT3 Transcription Factor;Sirtuin 1	37.5019	0.354318	-2.53244	Epigenomic cell regulation	105
21558425	2011	Human molecular genetics	Miñones-Moyano, Elena;Porta, Sílvia;Escaramís, Georgia;Rabionet, Raquel;Iraola, Susana;Kagerbauer, Birgit;Espinosa-Parrilla, Yolanda;Ferrer, Isidre;Estivill, Xavier;Martí, Eulàlia	MicroRNA profiling of Parkinson's disease brains identifies early downregulation of miR-34b/c which modulate mitochondrial function.	MicroRNAs (miRNAs) are post-transcriptional gene expression regulators, playing key roles in neuronal development, plasticity and disease. Parkinson's disease (PD) is the second most common neurodegenerative disorder, characterized by the presence of protein inclusions or Lewy bodies and a progressive loss of dopaminergic neurons in the midbrain. Here, we have evaluated miRNA expression deregulat…	Journal Article	eng		10.1093/hmg/ddr210	Blotting, Western;Cell Line, Tumor;Humans;MicroRNAs;Microscopy, Electron, Transmission;Mitochondrial Membranes;Oligonucleotide Array Sequence Analysis;Parkinson Disease;Real-Time Polymerase Chain Reaction	36.931	-0.0542145	-3.58819	Epigenomic cell regulation	105
21317927	2011	Oncogene	Schramedei, K;Mörbt, N;Pfeifer, G;Läuter, J;Rosolowski, M;Tomm, J M;von Bergen, M;Horn, F;Brocke-Heidrich, K	MicroRNA-21 targets tumor suppressor genes ANP32A and SMARCA4.	MicroRNA-21 (miR-21) is a key regulator of oncogenic processes. It is significantly elevated in the majority of human tumors and functionally linked to cellular proliferation, survival and migration. In this study, we used two experimental-based strategies to search for novel miR-21 targets. On the one hand, we performed a proteomic approach using two-dimensional differential gel electrophoresis …	Journal Article	eng	PMC3134876	10.1038/onc.2011.15	Base Sequence;Cell Survival;Cell Transformation, Neoplastic;Cells, Cultured;DNA Helicases;Down-Regulation;Gene Expression Regulation;Gene Targeting;Genes, Tumor Suppressor;Humans;Intracellular Signaling Peptides and Proteins;MicroRNAs;Molecular Sequence Data;Nuclear Proteins;RNA-Binding Proteins;Regulatory Sequences, Ribonucleic Acid;Sequence Homology, Nucleic Acid;Transcription Factors;Two-Dimen…	38.7608	0.578951	-3.50212	Epigenomic cell regulation	105
21143953	2010	BMC molecular biology	Guidi, Monica;Muiños-Gimeno, Margarita;Kagerbauer, Birgit;Martí, Eulàlia;Estivill, Xavier;Espinosa-Parrilla, Yolanda	Overexpression of miR-128 specifically inhibits the truncated isoform of NTRK3 and upregulates BCL2 in SH-SY5Y neuroblastoma cells.	BACKGROUND: Neurotrophins and their receptors are key molecules in the regulation of neuronal differentiation and survival. They mediate the survival of neurons during development and adulthood and are implicated in synaptic plasticity. The human neurotrophin-3 receptor gene NTRK3 yields two major isoforms, a full-length kinase-active form and a truncated non-catalytic form, which activates a spe…	Journal Article	eng	PMC3019150	10.1186/1471-2199-11-95	Base Sequence;Cell Line, Tumor;Computational Biology;Gene Expression Profiling;Humans;MicroRNAs;Nerve Growth Factors;Neuroblastoma;Neurons;Protein Isoforms;Proto-Oncogene Proteins c-bcl-2;RNA, Small Interfering;Receptor, trkC;Up-Regulation	37.2265	0.505781	-3.1743	Epigenomic cell regulation	105
20012062	2009	Child's nervous system : ChNS : official journal of the International Society for Pediatric Neurosurgery	Sredni, Simone Treiger;Bonaldo, Maria de Fátima;Costa, Fabrício Falconi;Huang, Chiang-Ching;Hamm, Christopher Allan;Rajaram, Veena;Tomita, Tadanori;Goldman, Stewart;Bischof, Jared Marshall;Soares, Marcelo Bento	Upregulation of mir-221 and mir-222 in atypical teratoid/rhabdoid tumors: potential therapeutic targets.	PURPOSE: The aim of this study is to search for new therapeutic targets for atypical teratoid-rhabdoid tumors (ATRT).METHODS: To achieve this, we compared the expression of 365 microRNAs among ATRT, medulloblastomas, and normal brain.RESULTS: MiR-221 and miR-222 were within the top differentially expressed microRNAs. The deregulated expression of miR221/222 was demonstrated to inhibit the express…	Journal Article	eng		10.1007/s00381-009-1028-y	Brain;Brain Neoplasms;Chromosomal Proteins, Non-Histone;Cyclin-Dependent Kinase Inhibitor p27;DNA-Binding Proteins;Female;Humans;Immunohistochemistry;Infant;Infant, Newborn;Male;MicroRNAs;Oligonucleotide Array Sequence Analysis;RNA, Messenger;Reverse Transcriptase Polymerase Chain Reaction;Rhabdoid Tumor;SMARCB1 Protein;Teratoma;Transcription Factors	39.1784	0.486346	-3.56816	Epigenomic cell regulation	105
32121554	2020	Cancers	Kalasauskas, Darius;Sorokin, Maxim;Sprang, Bettina;Elmasri, Alhassan;Viehweg, Sina;Salinas, Gabriela;Opitz, Lennart;Rave-Fraenk, Margret;Schulz-Schaeffer, Walter;Kantelhardt, Sven Reiner;Giese, Alf;Buzdin, Anton;Kim, Ella L	Diversity of Clinically Relevant Outcomes Resulting from Hypofractionated Radiation in Human Glioma Stem Cells Mirrors Distinct Patterns of Transcriptomic Changes.	Hypofractionated radiotherapy is the mainstay of the current treatment for glioblastoma. However, the efficacy of radiotherapy is hindered by the high degree of radioresistance associated with glioma stem cells comprising a heterogeneous compartment of cell lineages differing in their phenotypic characteristics, molecular signatures, and biological responses to external signals. Reconstruction of…	Journal Article	eng		10.3390/cancers12030570		1.27506	23.759	1.91757	Stem cell	80
31768071	2019	Nature genetics	Jessa, Selin;Blanchet-Cohen, Alexis;Krug, Brian;Vladoiu, Maria;Coutelier, Marie;Faury, Damien;Poreau, Brice;De Jay, Nicolas;Hébert, Steven;Monlong, Jean;Farmer, W Todd;Donovan, Laura K;Hu, Yixing;McConechy, Melissa K;Cavalli, Florence M G;Mikael, Leonie G;Ellezam, Benjamin;Richer, Maxime;Allaire, Andréa;Weil, Alexander G;Atkinson, Jeffrey;Farmer, Jean-Pierre;Dudley, Roy W R;Larouche, Valerie;Crev…	Stalled developmental programs at the root of pediatric brain tumors.	Childhood brain tumors have suspected prenatal origins. To identify vulnerable developmental states, we generated a single-cell transcriptome atlas of &gt;65,000 cells from embryonal pons and forebrain, two major tumor locations. We derived signatures for 191 distinct cell populations and defined the regional cellular diversity and differentiation dynamics. Projection of bulk tumor transcriptomes…	Journal Article	eng	PMC6885128	10.1038/s41588-019-0531-7	Animals;Brain;Brain Neoplasms;Cell Line, Tumor;Gene Expression Regulation, Developmental;Humans;Infant;Medulloblastoma;Mice;Neoplasms, Germ Cell and Embryonal;Nerve Fibers;Prosencephalon;Rhabdoid Tumor;Single-Cell Analysis	-7.3939	19.537	5.09803	Stem cell	80
31652994	2019	Cancers	Chesnelong, Charles;Hao, Xiaoguang;Cseh, Orsolya;Wang, Alice Yijun;Luchman, H Artee;Weiss, Samuel	SLUG Directs the Precursor State of Human Brain Tumor Stem Cells.	In glioblastoma (GBM), brain tumor stem cells (BTSCs) encompass heterogenous populations of multipotent, self-renewing, and tumorigenic cells, which have been proposed to be at the root of therapeutic resistance and recurrence. While the functional significance of BTSC heterogeneity remains to be fully determined, we previously distinguished relatively quiescent stem-like precursor state from the…	Journal Article	eng	PMC6895861	10.3390/cancers11111635		-0.0140277	26.8481	5.40663	Stem cell	80
31303549	2019	Cell stem cell	Rusu, Patricia;Shao, Chunxuan;Neuerburg, Anna;Acikgöz, Azer Aylin;Wu, Yonghe;Zou, Peng;Phapale, Prasad;Shankar, Tchirupura S;Döring, Kristina;Dettling, Steffen;Körkel-Qu, Huiqin;Bekki, Gözde;Costa, Barbara;Guo, Te;Friesen, Olga;Schlotter, Magdalena;Heikenwalder, Mathias;Tschaharganeh, Darjus F;Bukau, Bernd;Kramer, Günter;Angel, Peter;Herold-Mende, Christel;Radlwimmer, Bernhard;Liu, Hai-Kun	GPD1 Specifically Marks Dormant Glioma Stem Cells with a Distinct Metabolic Profile.	Brain tumor stem cells (BTSCs) are a chemoresistant population that can drive tumor growth and relapse, but the lack of BTSC-specific markers prevents selective targeting that spares resident stem cells. Through a ribosome-profiling analysis of mouse neural stem cells (NSCs) and BTSCs, we find glycerol-3-phosphate dehydrogenase 1 (GPD1) expression specifically in BTSCs and not in NSCs. GPD1 expre…	Journal Article	eng		10.1016/j.stem.2019.06.004		-2.97573	22.5878	4.66806	Stem cell	80
30992437	2019	Nature communications	Dirkse, Anne;Golebiewska, Anna;Buder, Thomas;Nazarov, Petr V;Muller, Arnaud;Poovathingal, Suresh;Brons, Nicolaas H C;Leite, Sonia;Sauvageot, Nicolas;Sarkisjan, Dzjemma;Seyfrid, Mathieu;Fritah, Sabrina;Stieber, Daniel;Michelucci, Alessandro;Hertel, Frank;Herold-Mende, Christel;Azuaje, Francisco;Skupin, Alexander;Bjerkvig, Rolf;Deutsch, Andreas;Voss-Böhme, Anja;Niclou, Simone P	Stem cell-associated heterogeneity in Glioblastoma results from intrinsic tumor plasticity shaped by the microenvironment.	The identity and unique capacity of cancer stem cells (CSC) to drive tumor growth and resistance have been challenged in brain tumors. Here we report that cells expressing CSC-associated cell membrane markers in Glioblastoma (GBM) do not represent a clonal entity defined by distinct functional properties and transcriptomic profiles, but rather a plastic state that most cancer cells can adopt. We …	Journal Article	eng	PMC6467886	10.1038/s41467-019-09853-z	Animals;Antineoplastic Agents, Alkylating;Biopsy;Brain Neoplasms;Cell Line, Tumor;Cell Plasticity;Cohort Studies;Drug Resistance, Neoplasm;Gene Expression Profiling;Glioblastoma;Humans;Mice;Mice, Inbred NOD;Mice, SCID;Neoplastic Stem Cells;Temozolomide;Treatment Outcome;Tumor Microenvironment;Xenograft Model Antitumor Assays	-3.03561	32.1251	6.45086	Stem cell	80
30982771	2019	Cell stem cell	Weng, Qinjie;Wang, Jincheng;Wang, Jiajia;He, Danyang;Cheng, Zuolin;Zhang, Feng;Verma, Ravinder;Xu, Lingli;Dong, Xinran;Liao, Yunfei;He, Xuelian;Potter, Andrew;Zhang, Liguo;Zhao, Chuntao;Xin, Mei;Zhou, Qian;Aronow, Bruce J;Blackshear, Perry J;Rich, Jeremy N;He, Qiaojun;Zhou, Wenhao;Suvà, Mario L;Waclaw, Ronald R;Potter, S Steven;Yu, Guoqiang;Lu, Q Richard	Single-Cell Transcriptomics Uncovers Glial Progenitor Diversity and Cell Fate Determinants during Development and Gliomagenesis.	The identity and degree of heterogeneity of glial progenitors and their contributions to brain tumor malignancy remain elusive. By applying lineage-targeted single-cell transcriptomics, we uncover an unanticipated diversity of glial progenitor pools with unique molecular identities in developing brain. Our analysis identifies distinct transitional intermediate states and their divergent developme…	Journal Article	eng	PMC6669001	10.1016/j.stem.2019.03.006		-4.57202	19.4008	1.90347	Stem cell	80
30871073	2019	Cancers	Linder, Benedikt;Wehle, Andrej;Hehlgans, Stephanie;Bonn, Florian;Dikic, Ivan;Rödel, Franz;Seifert, Volker;Kögel, Donat	Arsenic Trioxide and (-)-Gossypol Synergistically Target Glioma Stem-Like Cells via Inhibition of Hedgehog and Notch Signaling.	Glioblastoma is one of the deadliest malignancies and is virtually incurable. Accumulating evidence indicates that a small population of cells with a stem-like phenotype is the major culprit of tumor recurrence. Enhanced DNA repair capacity and expression of stemness marker genes are the main characteristics of these cells. Elimination of this population might delay or prevent tumor recurrence fo…	Journal Article	eng	PMC6468469	10.3390/cancers11030350		-1.10965	24.2735	4.27268	Stem cell	80
30864699	2019	Oncology reports	Shevchenko, Valery;Arnotskaya, Nataliya;Korneyko, Maria;Zaytsev, Sergry;Khotimchenko, Yuriy;Sharma, Hary;Bryukhovetskiy, Igor	Proteins of the Wnt signaling pathway as targets for the regulation of CD133+ cancer stem cells in glioblastoma.	Glioblastoma multiforme (GBM) is one of the most aggressive types of brain tumor and is highly resistant to therapy. The median survival time for patients with GBM is 15 months. GBM resistance to treatment is associated with cancer stem cells (CSCs). CD133 membrane glycoprotein is the best‑known marker of GBM CSCs. The Wnt signaling pathway plays an important role in the proliferation of all stem…	Journal Article	eng		10.3892/or.2019.7043	AC133 Antigen;Antineoplastic Agents;Brain Neoplasms;Cell Line, Tumor;Cell Proliferation;Computational Biology;Gene Expression Profiling;Gene Expression Regulation, Neoplastic;Glioblastoma;Humans;Molecular Targeted Therapy;Neoplastic Stem Cells;Proteomics;Wnt Signaling Pathway	-1.62158	32.2487	7.0554	Stem cell	80
30631035	2019	Cell death &amp; disease	Hu, Peishan;Li, Shanshan;Tian, Ningyu;Wu, Fan;Hu, Yan;Li, Dengke;Qi, Yingjiao;Wei, Zhizhong;Wei, Qunfang;Li, Yanchao;Yin, Bin;Jiang, Tao;Yuan, Jiangang;Qiang, Boqin;Han, Wei;Peng, Xiaozhong	Acidosis enhances the self-renewal and mitochondrial respiration of stem cell-like glioma cells through CYP24A1-mediated reduction of vitamin D.	Acidosis is a significant feature of the tumor microenvironment in glioma, and it is closely related to multiple biological functions of cancer stem cells. Here, we found that the self-renewal ability, the mitochondrial activity and ATP production were elevated in stem cell-like glioma cells (SLCs) under acidic microenvironment, which promoted and maintained the stemness of SLCs. Under acidosis, …	Journal Article	eng	PMC6328565	10.1038/s41419-018-1242-1	Acidosis;Animals;Brain Neoplasms;Calcitriol;Cell Line, Tumor;Cell Self Renewal;Culture Media, Serum-Free;Glioma;Heterografts;Humans;Hydrochloric Acid;Hydrogen-Ion Concentration;Mice;Mice, Inbred BALB C;Mice, Nude;Mitochondria;Neoplastic Stem Cells;Phenotype;Sodium Hydroxide;Transcriptome;Tumor Microenvironment;Vitamin D3 24-Hydroxylase	-4.06927	29.7963	5.99229	Stem cell	80
30333528	2018	Experimental &amp; molecular medicine	Kim, Hee Yeon;Kim, Dong Keon;Bae, Seung-Hyun;Gwak, HyeRan;Jeon, Ji Hoon;Kim, Jong Kwang;Lee, Byung Il;You, Hye Jin;Shin, Dong Hoon;Kim, Young-Ho;Kim, Soo Youl;Han, Sung-Sik;Shim, Jin-Kyoung;Lee, Ji-Hyun;Kang, Seok-Gu;Jang, Hyonchol	Farnesyl diphosphate synthase is important for the maintenance of glioblastoma stemness.	Glioblastoma is a highly malignant tumor that easily acquires resistance to treatment. The stem-cell-like character (stemness) has been thought to be closely associated with the treatment resistance of glioblastoma cells. In this study, we determined that farnesyl diphosphate synthase (FDPS), a key enzyme in isoprenoid biosynthesis, plays an important role in maintaining glioblastoma stemness. A …	Journal Article	eng	PMC6193020	10.1038/s12276-018-0166-2	Cell Line, Tumor;Cholesterol;Gene Expression Profiling;Gene Knockdown Techniques;Geranyltranstransferase;Glioblastoma;Humans;Neoplastic Stem Cells;Spheroids, Cellular;Transcriptome;Tumor Cells, Cultured	-1.30253	24.3942	4.25715	Stem cell	80
30167084	2018	Oncotarget	Gouazé-Andersson, Valérie;Ghérardi, Marie-Julie;Lemarié, Anthony;Gilhodes, Julia;Lubrano, Vincent;Arnauduc, Florent;Cohen-Jonathan Moyal, Elizabeth;Toulas, Christine	FGFR1/FOXM1 pathway: a key regulator of glioblastoma stem cells radioresistance and a prognosis biomarker.	Glioblastoma are known to be aggressive and therapy-resistant tumors, due to the presence of glioblastoma stem cells inside this heterogeneous tumor. We investigate here the involvement of FGFR1 in glioblastoma stem-like cells (GSLC) radioresistance mechanisms. We first demonstrated that the survival after irradiation was significantly diminished in FGFR1-silenced (FGFR1-) GSLC compared to contro…	Journal Article	eng	PMC6114977	10.18632/oncotarget.25827		1.43787	23.7541	2.02751	Stem cell	80
30041684	2018	Genome medicine	Yuan, Jinzhou;Levitin, Hanna Mendes;Frattini, Veronique;Bush, Erin C;Boyett, Deborah M;Samanamud, Jorge;Ceccarelli, Michele;Dovas, Athanassios;Zanazzi, George;Canoll, Peter;Bruce, Jeffrey N;Lasorella, Anna;Iavarone, Antonio;Sims, Peter A	Single-cell transcriptome analysis of lineage diversity in high-grade glioma.	Despite extensive molecular characterization, we lack a comprehensive understanding of lineage identity, differentiation, and proliferation in high-grade gliomas (HGGs).</AbstractText>: Despite extensive molecular characterization, we lack a comprehensive understanding of lineage identity, differentiation, and proliferation in high-grade gliomas (HGGs).We sampled the cellular milieu of HGGs by pr…	Journal Article	eng	PMC6058390	10.1186/s13073-018-0567-9	Brain Neoplasms;Cell Proliferation;Cell Transformation, Neoplastic;Glioma;Humans;Neuroglia;Neurons;Single-Cell Analysis;Transcriptome	-4.40291	19.3779	1.75955	Stem cell	80
30022047	2018	Cell death &amp; disease	Her, Nam-Gu;Oh, Jeong-Woo;Oh, Yun Jeong;Han, Suji;Cho, Hee Jin;Lee, Yeri;Ryu, Gyu Ha;Nam, Do-Hyun	Potent effect of the MDM2 inhibitor AMG232 on suppression of glioblastoma stem cells.	Testing new ways to identify untapped opportunities for glioblastoma therapies remains highly significant. Amplification and overexpression of MDM2 gene is frequent in glioblastoma and disrupting the MDM2-p53 interaction is a promising strategy to treat the cancer. RG7112 is the first-in class inhibitor and recently discovered AMG232 is the most potent MDM2 inhibitor known to date. Here, we compa…	Journal Article	eng	PMC6052082	10.1038/s41419-018-0825-1	Acetates;Apoptosis;Cell Line, Tumor;Enzyme Inhibitors;Glioblastoma;Humans;Imidazolines;Mutation;Nestin;Piperidones;Proto-Oncogene Proteins c-mdm2;Tumor Suppressor Protein p53;Zinc Finger E-box-Binding Homeobox 1	-0.934738	24.366	4.27559	Stem cell	80
29773872	2018	Scientific reports	Fiscon, Giulia;Conte, Federica;Licursi, Valerio;Nasi, Sergio;Paci, Paola	Computational identification of specific genes for glioblastoma stem-like cells identity.	Glioblastoma, the most malignant brain cancer, contains self-renewing, stem-like cells that sustain tumor growth and therapeutic resistance. Identifying genes promoting stem-like cell differentiation might unveil targets for novel treatments. To detect them, here we apply SWIM - a software able to unveil genes (named switch genes) involved in drastic changes of cell phenotype - to public datasets…	Journal Article	eng	PMC5958093	10.1038/s41598-018-26081-5	Brain Neoplasms;Cell Differentiation;Computational Biology;Gene Expression Regulation, Neoplastic;Glioblastoma;Humans;Neoplastic Stem Cells;Software;Transcription Factors;Transcriptome	-3.67333	25.5286	4.44605	Stem cell	80
29507698	2018	Oncotarget	Verano-Braga, Thiago;Gorshkov, Vladimir;Munthe, Sune;Sørensen, Mia D;Kristensen, Bjarne W;Kjeldsen, Frank	SuperQuant-assisted comparative proteome analysis of glioblastoma subpopulations allows for identification of potential novel therapeutic targets and cell markers.	Glioblastoma (GBM) is a highly aggressive brain cancer with poor prognosis and low survival rate. Invasive cancer stem-like cells (CSCs) are responsible for tumor recurrence because they escape current treatments. Our main goal was to study the proteome of three GBM subpopulations to identify key molecules behind GBM cell phenotypes and potential cell markers for migrating cells. We used SuperQua…	Journal Article	eng	PMC5823648	10.18632/oncotarget.24321		-1.45811	31.3253	6.95392	Stem cell	80
29311336	2018	Proceedings of the National Academy of Sciences of the United States of America	Basak, Onur;Krieger, Teresa G;Muraro, Mauro J;Wiebrands, Kay;Stange, Daniel E;Frias-Aldeguer, Javier;Rivron, Nicolas C;van de Wetering, Marc;van Es, Johan H;van Oudenaarden, Alexander;Simons, Benjamin D;Clevers, Hans	Troy+ brain stem cells cycle through quiescence and regulate their number by sensing niche occupancy.	The adult mouse subependymal zone provides a niche for mammalian neural stem cells (NSCs). However, the molecular signature, self-renewal potential, and fate behavior of NSCs remain poorly defined. Here we propose a model in which the fate of active NSCs is coupled to the total number of neighboring NSCs in a shared niche. Using knock-in reporter alleles and single-cell RNA sequencing, we show th…	Journal Article	eng	PMC5789932	10.1073/pnas.1715911114	Animals;Cell Lineage;Cell Proliferation;Lateral Ventricles;Mice;Neural Stem Cells;Neurogenesis;Receptors, Tumor Necrosis Factor;Single-Cell Analysis;Stem Cell Niche;Transcriptome	-4.1523	23.693	4.47058	Stem cell	80
29208670	2017	Clinical cancer research : an official journal of the American Association for Cancer Research	Jin, Xiong;Jin, Xun;Kim, Leo J Y;Dixit, Deobrat;Jeon, Hee-Young;Kim, Eun-Jung;Kim, Jun-Kyum;Lee, Seon Yong;Yin, Jinlong;Rich, Jeremy N;Kim, Hyunggee	Inhibition of ID1-BMPR2 Intrinsic Signaling Sensitizes Glioma Stem Cells to Differentiation Therapy.	Purpose: Normal stem cells tightly control self-renewal and differentiation during development, but their neoplastic counterparts, cancer stem cells (CSCs), sustain tumorigenicity both through aberrant activation of stemness and evasion of differentiation. Although regulation of CSC stemness has been extensively studied, the molecular mechanisms suppressing differentiation remain unclear.Experime…	Journal Article	eng		10.1158/1078-0432.CCR-17-1529	Animals;Antineoplastic Agents;Bone Morphogenetic Protein Receptors, Type II;Cell Differentiation;Cell Line, Tumor;Cell Proliferation;Disease Models, Animal;Drug Resistance, Neoplasm;Glioma;Humans;Inhibitor of Differentiation Protein 1;Mice;Mice, Knockout;Neoplastic Stem Cells;Radiation Tolerance;Signal Transduction;Transcriptome;Xenograft Model Antitumor Assays	-5.21648	26.0554	6.87408	Stem cell	80
29033351	2017	Cell stem cell	Köhler, Corinna;Nittner, David;Rambow, Florian;Radaelli, Enrico;Stanchi, Fabio;Vandamme, Niels;Baggiolini, Arianna;Sommer, Lukas;Berx, Geert;van den Oord, Joost J;Gerhardt, Holger;Blanpain, Cedric;Marine, Jean-Christophe	Mouse Cutaneous Melanoma Induced by Mutant BRaf Arises from Expansion and Dedifferentiation of Mature Pigmented Melanocytes.	To identify the cells at the origin of melanoma, we combined single-cell lineage-tracing and transcriptomics approaches with time-lapse imaging. A mouse model that recapitulates key histopathological features of human melanomagenesis was created by inducing a BRafV600E-driven melanomagenic program in tail interfollicular melanocytes. Most targeted mature, melanin-producing melanocytes expanded cl…	Journal Article	eng		10.1016/j.stem.2017.08.003	Animals;Biomarkers;Carcinogenesis;Cell Dedifferentiation;Cell Proliferation;Dermis;Hair Follicle;Humans;Melanocytes;Melanoma;Mice;Mutation;Neoplasm Invasiveness;Proto-Oncogene Proteins B-raf;Skin Neoplasms;Skin Pigmentation;Stem Cell Niche;Tail;Transcriptome	-6.10155	20.0146	2.6434	Stem cell	80
28465359	2017	Genes &amp; development	Bulstrode, Harry;Johnstone, Ewan;Marques-Torrejon, Maria Angeles;Ferguson, Kirsty M;Bressan, Raul Bardini;Blin, Carla;Grant, Vivien;Gogolok, Sabine;Gangoso, Ester;Gagrica, Sladjana;Ender, Christine;Fotaki, Vassiliki;Sproul, Duncan;Bertone, Paul;Pollard, Steven M	Elevated FOXG1 and SOX2 in glioblastoma enforces neural stem cell identity through transcriptional control of cell cycle and epigenetic regulators.	Glioblastoma multiforme (GBM) is an aggressive brain tumor driven by cells with hallmarks of neural stem (NS) cells. GBM stem cells frequently express high levels of the transcription factors FOXG1 and SOX2. Here we show that increased expression of these factors restricts astrocyte differentiation and can trigger dedifferentiation to a proliferative NS cell state. Transcriptional targets include…	Journal Article	eng	PMC5435889	10.1101/gad.293027.116	Amino Acid Motifs;Astrocytes;Azacitidine;Brain Neoplasms;Cell Cycle;Cell Differentiation;Chromatin;DNA Methylation;Epigenomics;Forkhead Box Protein O3;Forkhead Transcription Factors;Gene Expression Regulation, Neoplastic;Glioblastoma;Humans;Mutation;Nerve Tissue Proteins;Neural Stem Cells;Protein Binding;SOXB1 Transcription Factors;Tumor Cells, Cultured	1.91868	22.4064	3.99473	Stem cell	80
28430184	2017	Cell death and differentiation	Nguyen, Duong Thi Thuy;Richter, Daniel;Michel, Geert;Mitschka, Sibylle;Kolanus, Waldemar;Cuevas, Elisa;Wulczyn, F Gregory	The ubiquitin ligase LIN41/TRIM71 targets p53 to antagonize cell death and differentiation pathways during stem cell differentiation.	Rapidity and specificity are characteristic features of proteolysis mediated by the ubiquitin-proteasome system. Therefore, the UPS is ideally suited for the remodeling of the embryonic stem cell proteome during the transition from pluripotent to differentiated states and its inverse, the generation of inducible pluripotent stem cells. The Trim-NHL family member LIN41 is among the first E3 ubiqui…	Journal Article	eng	PMC5442473	10.1038/cdd.2017.54	Animals;Apoptosis;Caspase 3;Cell Differentiation;DNA-Binding Proteins;Embryonic Stem Cells;Gene Expression Regulation, Developmental;Mice;Neurogenesis;Signal Transduction;Transcription Factors;Tumor Suppressor Protein p53;Ubiquitination	-4.67989	24.0905	5.41151	Stem cell	80
28273453	2017	Cell reports	Qadir, Abdul S;Ceppi, Paolo;Brockway, Sonia;Law, Calvin;Mu, Liang;Khodarev, Nikolai N;Kim, Jung;Zhao, Jonathan C;Putzbach, William;Murmann, Andrea E;Chen, Zhuo;Chen, Wenjing;Liu, Xia;Salomon, Arthur R;Liu, Huiping;Weichselbaum, Ralph R;Yu, Jindan;Peter, Marcus E	CD95/Fas Increases Stemness in Cancer Cells by Inducing a STAT1-Dependent Type I Interferon Response.	Stimulation of CD95/Fas drives and maintains cancer stem cells (CSCs). We now report that this involves activation of signal transducer and activator of transcription 1 (STAT1) and induction of STAT1-regulated genes and that this process is inhibited by active caspases. STAT1 is enriched in CSCs in cancer cell lines, patient-derived human breast cancer, and CD95(high)-expressing glioblastoma neur…	Journal Article	eng	PMC5474321	10.1016/j.celrep.2017.02.037	Breast Neoplasms;Caspase 3;Cell Line, Tumor;Down-Regulation;Female;Gene Expression Regulation, Neoplastic;Gene Knockout Techniques;Humans;Interferon Type I;Isotope Labeling;Neoplastic Stem Cells;Phosphorylation;RNA, Small Interfering;STAT1 Transcription Factor;Signal Transduction;Up-Regulation;fas Receptor	-2.91234	31.4898	6.83674	Stem cell	80
28256619	2017	Scientific reports	Riddick, Gregory;Kotliarova, Svetlana;Rodriguez, Virginia;Kim, H S;Linkous, Amanda;Storaska, Andrew J;Ahn, Susie;Walling, Jennifer;Belova, Galina;Fine, Howard A	A Core Regulatory Circuit in Glioblastoma Stem Cells Links MAPK Activation to a Transcriptional Program of Neural Stem Cell Identity.	Glioblastoma, the most common primary malignant brain tumor, harbors a small population of tumor initiating cells (glioblastoma stem cells) that have many properties similar to neural stem cells. To investigate common regulatory networks in both neural and glioblastoma stem cells, we subjected both cell types to in-vitro differentiation conditions and measured global gene-expression changes using…	Journal Article	eng	PMC5335262	10.1038/srep43605	Animals;Binding Sites;Biomarkers;Brain Neoplasms;Cell Line, Tumor;Computational Biology;Disease Progression;Gene Expression Profiling;Gene Expression Regulation, Neoplastic;Gene Regulatory Networks;Genome-Wide Association Study;Glioblastoma;Humans;Mice;Mitogen-Activated Protein Kinases;Neoplasm Grading;Neoplastic Stem Cells;Neural Stem Cells;Protein Binding;Signal Transduction;Transcription Facto…	-4.23778	25.1307	5.51761	Stem cell	80
28122246	2017	Cell reports	Jiang, Yiwen;Marinescu, Voichita Dana;Xie, Yuan;Jarvius, Malin;Maturi, Naga Prathyusha;Haglund, Caroline;Olofsson, Sara;Lindberg, Nanna;Olofsson, Tommie;Leijonmarck, Caroline;Hesselager, Göran;Alafuzoff, Irina;Fryknäs, Mårten;Larsson, Rolf;Nelander, Sven;Uhrbom, Lene	Glioblastoma Cell Malignancy and Drug Sensitivity Are Affected by the Cell of Origin.	The identity of the glioblastoma (GBM) cell of origin and its contributions to disease progression and treatment response remain largely unknown. We have analyzed how the phenotypic state of the initially transformed cell affects mouse GBM development and essential GBM cell (GC) properties. We find that GBM induced in neural stem-cell-like glial fibrillary acidic protein (GFAP)-expressing cells i…	Journal Article	eng		10.1016/j.celrep.2017.01.003	2',3'-Cyclic-Nucleotide Phosphodiesterases;Adult;Aged;Animals;Antineoplastic Agents;Brain;Brain Neoplasms;Cell Differentiation;Cell Proliferation;Cell Self Renewal;Cell Survival;Cyclin-Dependent Kinase Inhibitor p19;Disease-Free Survival;Female;Glial Fibrillary Acidic Protein;Glioblastoma;Humans;Male;Mice;Mice, Inbred NOD;Mice, Knockout;Mice, SCID;Middle Aged;Nestin;Tumor Cells, Cultured	-2.24808	22.0077	2.30902	Stem cell	80
28117838	2017	Translational psychiatry	Vizlin-Hodzic, D;Zhai, Q;Illes, S;Södersten, K;Truvé, K;Parris, T Z;Sobhan, P K;Salmela, S;Kosalai, S T;Kanduri, C;Strandberg, J;Seth, H;Bontell, T O;Hanse, E;Funa, K	Early onset of inflammation during ontogeny of bipolar disorder: the NLRP2 inflammasome gene distinctly differentiates between patients and healthy controls in the transition between iPS cell and neural stem cell stages.	Neuro-inflammation and neuronal communication are considered as mis-regulated processes in the aetiology and pathology of bipolar disorder (BD). Which and when specific signal pathways become abnormal during the ontogeny of bipolar disorder patients is unknown. To address this question, we applied induced pluripotent stem cell (iPSC) technology followed by cortical neural differentiation on adipo…	Journal Article	eng	PMC5545741	10.1038/tp.2016.284	Actins;Adaptor Proteins, Signal Transducing;Adipocytes;Age of Onset;Bipolar Disorder;Case-Control Studies;Gene Expression Profiling;Humans;In Vitro Techniques;Induced Pluripotent Stem Cells;Inflammasomes;Inflammation;Microfilament Proteins;Muscle Proteins;Neural Stem Cells;Patch-Clamp Techniques;Real-Time Polymerase Chain Reaction;Reverse Transcriptase Polymerase Chain Reaction	-5.24021	22.5098	5.89894	Stem cell	80
28115362	2017	Cancer research	Sreedharan, Smitha;Maturi, Naga Prathyusha;Xie, Yuan;Sundström, Anders;Jarvius, Malin;Libard, Sylwia;Alafuzoff, Irina;Weishaupt, Holger;Fryknäs, Mårten;Larsson, Rolf;Swartling, Fredrik J;Uhrbom, Lene	Mouse Models of Pediatric Supratentorial High-grade Glioma Reveal How Cell-of-Origin Influences Tumor Development and Phenotype.	High-grade glioma (HGG) is a group of primary malignant brain tumors with dismal prognosis. Whereas adult HGG has been studied extensively, childhood HGG, a relatively rare disease, is less well-characterized. Here, we present two novel platelet-derived growth factor (PDGF)-driven mouse models of pediatric supratentorial HGG. Tumors developed from two different cells of origin reminiscent of neur…	Journal Article	eng		10.1158/0008-5472.CAN-16-2482	Adult;Animals;Cell Lineage;Child;Disease Models, Animal;Gene Expression Profiling;Glioma;Humans;Mice;Mice, Transgenic;Neural Stem Cells;Neurons;Oligodendroglia;Oligonucleotide Array Sequence Analysis;Phenotype;Principal Component Analysis;Supratentorial Neoplasms;Transcriptome	-4.08495	21.1673	2.64898	Stem cell	80
28032215	2016	Acta neuropathologica	El-Habr, Elias A;Dubois, Luiz G;Burel-Vandenbos, Fanny;Bogeas, Alexandra;Lipecka, Joanna;Turchi, Laurent;Lejeune, François-Xavier;Coehlo, Paulo Lucas Cerqueira;Yamaki, Tomohiro;Wittmann, Bryan M;Fareh, Mohamed;Mahfoudhi, Emna;Janin, Maxime;Narayanan, Ashwin;Morvan-Dubois, Ghislaine;Schmitt, Charlotte;Verreault, Maité;Oliver, Lisa;Sharif, Ariane;Pallud, Johan;Devaux, Bertrand;Puget, Stéphanie;Kork…	A driver role for GABA metabolism in controlling stem and proliferative cell state through GHB production in glioma.	Cell populations with differing proliferative, stem-like and tumorigenic states co-exist in most tumors and especially malignant gliomas. Whether metabolic variations can drive this heterogeneity by controlling dynamic changes in cell states is unknown. Metabolite profiling of human adult glioblastoma stem-like cells upon loss of their tumorigenicity revealed a switch in the catabolism of the GAB…	Journal Article	eng	PMC5348560	10.1007/s00401-016-1659-5	Aged;Animals;Brain;Brain Neoplasms;Carcinogenesis;Cell Death;Cell Proliferation;Child;Child, Preschool;Female;Glioma;Humans;Hydroxybutyrates;Male;Mice, Nude;Middle Aged;Neoplasm Transplantation;Neoplastic Stem Cells;Succinate-Semialdehyde Dehydrogenase;gamma-Aminobutyric Acid	-2.82956	22.3194	4.89462	Stem cell	80
27870168	2016	Stem cells (Dayton, Ohio)	Okawa, Satoshi;Gagrica, Sladjana;Blin, Carla;Ender, Christine;Pollard, Steven M;Krijgsveld, Jeroen	Proteome and Secretome Characterization of Glioblastoma-Derived Neural Stem Cells.	Glioblastoma multiforme (GBM) (grade IV astrocytoma) is the most common and aggressive primary brain tumor. GBM consists of heterogeneous cell types including a subset of stem cell-like cells thought to sustain tumor growth. These tumor-initiating glioblastoma multiforme-derived neural stem (GNS) cells as well as their genetically normal neural stem (NS) counterparts can be propagated in culture …	Journal Article	eng	PMC6135235	10.1002/stem.2542	Biomarkers, Tumor;Brain Neoplasms;Cell Line, Tumor;Chromosome Aberrations;Gene Regulatory Networks;Glioblastoma;Humans;Immunohistochemistry;Ligands;Neoplasm Proteins;Neural Stem Cells;Proteome;Reproducibility of Results;Tetraspanin 29;Transcription Factors;Transcriptome	-2.3894	26.1786	3.0304	Stem cell	80
27725724	2016	Scientific reports	Xia, Honghai;Cao, Jun;Li, Qing;Lv, Yang;Jia, Weidong;Ren, Weihua;Cheng, Qingyu;Song, Xiaoyuan;Xu, Geliang	Hepatocellular Carcinoma-propagating Cells are Detectable by Side Population Analysis and Possess an Expression Profile Reflective of a Primitive Origin.	The recent identification of Side Population (SP) cells in a number of unrelated human cancers has renewed interests in the hypothesis of cancer stem cells. Here we isolated SP cells from HepG2 cells and 18 of the 21 fresh hepatocellular carcinoma (HCC) tissue samples. These SP cells have higher abilities of forming spheroids, invasion and migration. Tumors could generate only from SP, not non-SP…	Journal Article	eng	PMC5057076	10.1038/srep34856	Animals;CCAAT-Binding Factor;Carcinoma, Hepatocellular;Cell Proliferation;Gene Expression Regulation, Neoplastic;HMGA2 Protein;Hep G2 Cells;Heterografts;Humans;Kruppel-Like Transcription Factors;Liver Neoplasms;Mice;Mice, SCID;Neoplastic Stem Cells;Side-Population Cells;Transcription Factors;Transcriptome	-3.43668	24.9546	3.8584	Stem cell	80
27693047	2016	Cancer cell	Bardella, Chiara;Al-Dalahmah, Osama;Krell, Daniel;Brazauskas, Pijus;Al-Qahtani, Khalid;Tomkova, Marketa;Adam, Julie;Serres, Sébastien;Lockstone, Helen;Freeman-Mills, Luke;Pfeffer, Inga;Sibson, Nicola;Goldin, Robert;Schuster-Böeckler, Benjamin;Pollard, Patrick J;Soga, Tomoyoshi;McCullagh, James S;Schofield, Christopher J;Mulholland, Paul;Ansorge, Olaf;Kriaucionis, Skirmantas;Ratcliffe, Peter J;Sze…	Expression of Idh1&lt;sup&gt;R132H&lt;/sup&gt; in the Murine Subventricular Zone Stem Cell Niche Recapitulates Features of Early Gliomagenesis.	Isocitrate dehydrogenase 1 mutations drive human gliomagenesis, probably through neomorphic enzyme activity that produces D-2-hydroxyglutarate. To model this disease, we conditionally expressed Idh1(R132H) in the subventricular zone (SVZ) of the adult mouse brain. The mice developed hydrocephalus and grossly dilated lateral ventricles, with accumulation of 2-hydroxyglutarate and reduced alpha-ket…	Journal Article	eng	PMC5064912	10.1016/j.ccell.2016.08.017	Animals;Brain Neoplasms;DNA Methylation;Glioma;Isocitrate Dehydrogenase;Lateral Ventricles;Mice;Mice, Transgenic;Mutation;Neoplastic Stem Cells;Stem Cell Niche;Transcriptome	-4.77645	22.7762	3.73876	Stem cell	80
27582061	2016	Science translational medicine	Allen, Marie;Bjerke, Mia;Edlund, Hanna;Nelander, Sven;Westermark, Bengt	Origin of the U87MG glioma cell line: Good news and bad news.	Human tumor-derived cell lines are indispensable tools for basic and translational oncology. They have an infinite life span and are easy to handle and scalable, and results can be obtained with high reproducibility. However, a tumor-derived cell line may not be authentic to the tumor of origin. Two major questions emerge: Have the identity of the donor and the actual tumor origin of the cell lin…	Journal Article	eng		10.1126/scitranslmed.aaf6853	Brain Neoplasms;Cell Culture Techniques;Cell Line, Tumor;DNA Fingerprinting;DNA, Mitochondrial;DNA, Neoplasm;Gene Expression Profiling;Glioblastoma;Glioma;Humans;Microsatellite Repeats;Translational Medical Research	-3.42623	19.975	1.28053	Stem cell	80
27210718	2016	Cytotherapy	Onzi, Giovana Ravizzoni;Ledur, Pítia Flores;Hainzenreder, Luana Dimer;Bertoni, Ana Paula Santin;Silva, Andrew Oliveira;Lenz, Guido;Wink, Márcia Rosângela	Analysis of the safety of mesenchymal stromal cells secretome for glioblastoma treatment.	The purpose of this study was to investigate whether the secretome of human adipose-derived stem cells (hADSC) affects human glioblastoma (GBM) cancer stem cell (CSC) subpopulation or has any influence on drug resistance and cell migration, evaluating the safety of hADSCs for novel cancer therapies.</AbstractText>: The purpose of this study was to investigate whether the secretome of human adipos…	Journal Article	eng		10.1016/j.jcyt.2016.03.299	Adipose Tissue;Cell Line, Tumor;Cell Movement;Cell Proliferation;Culture Media, Conditioned;Drug Resistance, Neoplasm;Gene Expression Profiling;Gene Expression Regulation, Neoplastic;Glioblastoma;Humans;Mesenchymal Stem Cells;Neoplastic Stem Cells;Proteome;Spheroids, Cellular	-2.19593	31.438	5.83747	Stem cell	80
27106408	2016	Neuro-oncology	Ledur, Pítia F;Liu, Chong;He, Hua;Harris, Alexandra R;Minussi, Darlan C;Zhou, Hai-Yan;Shaffrey, Mark E;Asthagiri, Ashok;Lopes, Maria Beatriz S;Schiff, David;Lu, Yi-Cheng;Mandell, James W;Lenz, Guido;Zong, Hui	Culture conditions tailored to the cell of origin are critical for maintaining native properties and tumorigenicity of glioma cells.	Cell culture plays a pivotal role in cancer research. However, culture-induced changes in biological properties of tumor cells profoundly affect research reproducibility and translational potential. Establishing culture conditions tailored to the cancer cell of origin could resolve this problem. For glioma research, it has been previously shown that replacing serum with defined growth factors for…	Journal Article	eng	PMC5035523	10.1093/neuonc/now062	Animals;Blotting, Western;Cell Culture Techniques;Cluster Analysis;Fluorescent Antibody Technique;Glioma;Heterografts;Humans;Mice;Neoplastic Stem Cells;Neural Stem Cells;Neurons;Oligodendroglia;Real-Time Polymerase Chain Reaction;Tissue Array Analysis;Transcriptome;Tumor Cells, Cultured	-3.51177	19.9709	1.36871	Stem cell	80
26880947	2016	Stem cells international	Catanzaro, Giuseppina;Besharat, Zein Mersini;Garg, Neha;Ronci, Maurizio;Pieroni, Luisa;Miele, Evelina;Mastronuzzi, Angela;Carai, Andrea;Alfano, Vincenzo;Po, Agnese;Screpanti, Isabella;Locatelli, Franco;Urbani, Andrea;Ferretti, Elisabetta	MicroRNAs-Proteomic Networks Characterizing Human Medulloblastoma-SLCs.	Medulloblastoma (MB) is the most common malignant brain tumor of pediatric age and is characterized by cells expressing stem, astroglial, and neuronal markers. Among them, stem-like cells (hMB-SLCs) represent a fraction of the tumor cell population with the potential of self-renewal and proliferation and have been associated with tumor poor prognosis. In this context, microRNAs have been describe…	Journal Article	eng	PMC4736593	10.1155/2016/2683042		-4.22928	23.024	6.01103	Stem cell	80
26670566	2015	Molecular &amp; cellular proteomics : MCP	Narushima, Yuta;Kozuka-Hata, Hiroko;Koyama-Nasu, Ryo;Tsumoto, Kouhei;Inoue, Jun-ichiro;Akiyama, Tetsu;Oyama, Masaaki	Integrative Network Analysis Combined with Quantitative Phosphoproteomics Reveals Transforming Growth Factor-beta Receptor type-2 (TGFBR2) as a Novel Regulator of Glioblastoma Stem Cell Properties.	Glioblastoma is one of the most malignant brain tumors with poor prognosis and their development and progression are known to be driven by glioblastoma stem cells. Although glioblastoma stem cells lose their cancer stem cell properties during cultivation in serum-containing medium, little is known about the molecular mechanisms regulating signaling alteration in relation to reduction of stem cell…	Journal Article	eng	PMC4813685	10.1074/mcp.M115.049999	Brain Neoplasms;Cell Proliferation;Computational Biology;Culture Media;Gene Expression Regulation, Neoplastic;Glioblastoma;Humans;Neoplastic Stem Cells;Phosphorylation;Protein-Serine-Threonine Kinases;Proteomics;Receptor, Transforming Growth Factor-beta Type II;Receptors, Transforming Growth Factor beta;Serum;Signal Transduction	-3.34922	26.009	7.18993	Stem cell	80
26573230	2015	Oncotarget	Podergajs, Neža;Motaln, Helena;Rajčević, Uroš;Verbovšek, Urška;Koršič, Marjan;Obad, Nina;Espedal, Heidi;Vittori, Miloš;Herold-Mende, Christel;Miletic, Hrvoje;Bjerkvig, Rolf;Turnšek, Tamara Lah	Transmembrane protein CD9 is glioblastoma biomarker, relevant for maintenance of glioblastoma stem cells.	The cancer stem cell model suggests that glioblastomas contain a subpopulation of stem-like tumor cells that reproduce themselves to sustain tumor growth. Targeting these cells thus represents a novel treatment strategy and therefore more specific markers that characterize glioblastoma stem cells need to be identified. In the present study, we performed transcriptomic analysis of glioblastoma tis…	Journal Article	eng	PMC4808020	10.18632/oncotarget.5477	Animals;Biomarkers, Tumor;Blotting, Western;Brain Neoplasms;Cell Line, Tumor;Cell Proliferation;Cell Survival;Gene Expression Profiling;Gene Expression Regulation, Neoplastic;Glioblastoma;Humans;Neoplastic Stem Cells;Organ Culture Techniques;RNA Interference;Rats, Nude;Reverse Transcriptase Polymerase Chain Reaction;Survival Analysis;Tetraspanin 29;Transplantation, Heterologous;Up-Regulation	-3.04039	25.5476	4.11708	Stem cell	80
26424886	2015	The Journal of neuroscience : the official journal of the Society for Neuroscience	Fukusumi, Yoshiyasu;Meier, Florian;Götz, Sebastian;Matheus, Friederike;Irmler, Martin;Beckervordersandforth, Ruth;Faus-Kessler, Theresa;Minina, Eleonora;Rauser, Benedict;Zhang, Jingzhong;Arenas, Ernest;Andersson, Elisabet;Niehrs, Christof;Beckers, Johannes;Simeone, Antonio;Wurst, Wolfgang;Prakash, Nilima	Dickkopf 3 Promotes the Differentiation of a Rostrolateral Midbrain Dopaminergic Neuronal Subset In Vivo and from Pluripotent Stem Cells In Vitro in the Mouse.	Wingless-related MMTV integration site 1 (WNT1)/β-catenin signaling plays a crucial role in the generation of mesodiencephalic dopaminergic (mdDA) neurons, including the substantia nigra pars compacta (SNc) subpopulation that preferentially degenerates in Parkinson's disease (PD). However, the precise functions of WNT1/β-catenin signaling in this context remain unknown. Stem cell-based regenerati…	Journal Article	eng	PMC6605475	10.1523/JNEUROSCI.1722-15.2015	Animals;Cell Count;Cell Differentiation;Cell Survival;Cells, Cultured;Deoxyuridine;Intercellular Signaling Peptides and Proteins;Mesencephalon;Mice;Mice, Inbred C57BL;Mice, Knockout;Neural Stem Cells;Pluripotent Stem Cells;Transcriptome;Wnt1 Protein	-5.45374	22.4687	6.00817	Stem cell	80
26303183	2015	Stem cells (Dayton, Ohio)	Cambuli, F M;Correa, B R;Rezza, A;Burns, S C;Qiao, M;Uren, P J;Kress, E;Boussouar, A;Galante, P A F;Penalva, L O F;Plateroti, M	A Mouse Model of Targeted Musashi1 Expression in Whole Intestinal Epithelium Suggests Regulatory Roles in Cell Cycle and Stemness.	The intestinal epithelium is very peculiar for its continuous cell renewal, fuelled by multipotent stem cells localized within the crypts of Lieberkühn. Several lines of evidence have established the evolutionary conserved RNA-binding protein Musashi1 as a marker of adult stem cells, including those of the intestinal epithelium, and revealed its roles in stem cell self-renewal and cell fate deter…	Journal Article	eng	PMC4713339	10.1002/stem.2202	Animals;Cell Cycle;Gene Targeting;Intestinal Mucosa;Mice;Nerve Tissue Proteins;RNA-Binding Proteins;Stem Cells	-3.21763	23.672	4.22929	Stem cell	80
26095605	2015	Stem cell reports	Cusulin, Carlo;Chesnelong, Charles;Bose, Pinaki;Bilenky, Misha;Kopciuk, Karen;Chan, Jennifer A;Cairncross, J Gregory;Jones, Steven J;Marra, Marco A;Luchman, H Artee;Weiss, Samuel	Precursor States of Brain Tumor Initiating Cell Lines Are Predictive of Survival in Xenografts and Associated with Glioblastoma Subtypes.	In glioblastoma multiforme (GBM), brain-tumor-initiating cells (BTICs) with cancer stem cell characteristics have been identified and proposed as primordial cells responsible for disease initiation, recurrence, and therapeutic resistance. However, the extent to which individual, patient-derived BTIC lines reflect the heterogeneity of GBM remains poorly understood. Here we applied a stem cell biol…	Journal Article	eng	PMC4618251	10.1016/j.stemcr.2015.05.010	Animals;Brain Neoplasms;Cell Differentiation;Cell Line, Tumor;Genetic Heterogeneity;Glioblastoma;Humans;Mice;Neoplastic Stem Cells;Transcriptome;Xenograft Model Antitumor Assays	-0.0233418	26.867	5.40138	Stem cell	80
25937368	2015	Stem cell reports	Lee, Dongjin R;Yoo, Jeong-Eun;Lee, Jae Souk;Park, Sanghyun;Lee, Junwon;Park, Chul-Yong;Ji, Eunhyun;Kim, Han-Soo;Hwang, Dong-Youn;Kim, Dae-Sung;Kim, Dong-Wook	PSA-NCAM-negative neural crest cells emerging during neural induction of pluripotent stem cells cause mesodermal tumors and unwanted grafts.	Tumorigenic potential of human pluripotent stem cells (hPSCs) is an important issue in clinical applications. Despite many efforts, PSC-derived neural precursor cells (NPCs) have repeatedly induced tumors in animal models even though pluripotent cells were not detected. We found that polysialic acid-neural cell adhesion molecule (PSA-NCAM)(-) cells among the early NPCs caused tumors, whereas PSA-…	Journal Article	eng	PMC4437469	10.1016/j.stemcr.2015.04.002	Animals;Cell Differentiation;Cell Lineage;Cells, Cultured;Ectoderm;Human Embryonic Stem Cells;Humans;Immunohistochemistry;Male;Mesoderm;Neoplasms;Neural Cell Adhesion Molecule L1;Neural Crest;Peripherins;Pluripotent Stem Cells;Rats;Rats, Sprague-Dawley;Sialic Acids;Transcriptome	-3.84994	22.7714	3.82128	Stem cell	80
25922361	2015	Glycobiology	Dahmen, Ann-Christine;Fergen, Marie-Therese;Laurini, Christine;Schmitz, Brigitte;Loke, Ian;Thaysen-Andersen, Morten;Diestel, Simone	Paucimannosidic glycoepitopes are functionally involved in proliferation of neural progenitor cells in the subventricular zone.	Protein glycosylation has received much attention due to its multiple functional roles in physiological and pathophysiological conditions. Paucimannose is a common mannosidic N-glycoepitope in invertebrates and plants but has only recently been detected in vertebrates. Herein, we demonstrate the presence of paucimannosidic epitopes specifically in early postnatal neural progenitor cells (NPCs) be…	Journal Article	eng		10.1093/glycob/cwv027	Animals;Animals, Newborn;Antibodies;Cell Differentiation;Cell Line;Cell Line, Tumor;Cell Proliferation;Epitopes;Glioblastoma;Glycosylation;Humans;Lateral Ventricles;Macrophages;Mannose;Mice;Neural Stem Cells	-3.99277	22.1012	3.73981	Stem cell	80
25894780	2015	Bulletin of experimental biology and medicine	Bryukhovetskii, I S;Bryukhovetskii, A S;Khotimchenko, Yu S	New biomolecular approaches to the treatment of glioblastoma multiforme.	The mechanisms of therapeutic resistance of human glioblastoma multiforme are analyzed. The authors make an attempt at systematization and scientific theoretical validation of new approaches to creation of biomedical cellular preparations, based on the oncoproteomic technologies, for personified therapy of the glial tumors. A new approach to the treatment of glioblastoma multiforme with due consi…	Journal Article	eng		10.1007/s10517-015-2864-2	Genomics;Glioblastoma;Humans;Neoplastic Stem Cells;Proteomics;Transcriptome	-0.452717	25.9863	3.12486	Stem cell	80
25826270	2015	PloS one	Malchenko, Sergey;Sredni, Simone Treiger;Hashimoto, Hitoshi;Kasai, Atsushi;Nagayasu, Kazuki;Xie, Jianping;Margaryan, Naira V;Seiriki, Kaoru;Lulla, Rishi R;Seftor, Richard E B;Pachman, Lauren M;Meltzer, Herbert Y;Hendrix, Mary J C;Soares, Marcelo B	A mouse model of human primitive neuroectodermal tumors resulting from microenvironmentally-driven malignant transformation of orthotopically transplanted radial glial cells.	There is growing evidence and a consensus in the field that most pediatric brain tumors originate from stem cells, of which radial glial cells constitute a subtype. Here we show that orthotopic transplantation of human radial glial (RG) cells to the subventricular zone of the 3rd ventricle--but not to other transplantation sites--of the brain in immunocompromised NOD-SCID mice, gives rise to tumo…	Journal Article	eng	PMC4380339	10.1371/journal.pone.0121707	Animals;Cell Line, Tumor;Cell Transplantation;Disease Models, Animal;Humans;Mice;Mice, Inbred NOD;Mice, SCID;Neuroectodermal Tumors, Primitive;Neuroglia;Tumor Microenvironment	-5.17729	20.4208	3.43153	Stem cell	80
25531110	2014	PloS one	Wee, Shimei;Niklasson, Maria;Marinescu, Voichita Dana;Segerman, Anna;Schmidt, Linnéa;Hermansson, Annika;Dirks, Peter;Forsberg-Nilsson, Karin;Westermark, Bengt;Uhrbom, Lene;Linnarsson, Sten;Nelander, Sven;Andäng, Michael	Selective calcium sensitivity in immature glioma cancer stem cells.	Tumor-initiating cells are a subpopulation in aggressive cancers that exhibit traits shared with stem cells, including the ability to self-renew and differentiate, commonly referred to as stemness. In addition, such cells are resistant to chemo- and radiation therapy posing a therapeutic challenge. To uncover stemness-associated functions in glioma-initiating cells (GICs), transcriptome profiles …	Journal Article	eng	PMC4274094	10.1371/journal.pone.0115698	Biomarkers, Tumor;Blotting, Western;Brain Neoplasms;Calcium;Cell Differentiation;Cell Proliferation;Fluorescent Antibody Technique;Gene Expression Profiling;Gene Expression Regulation, Neoplastic;Glioma;Humans;Neoplastic Stem Cells;Neural Stem Cells;Oligonucleotide Array Sequence Analysis;RNA, Messenger;Real-Time Polymerase Chain Reaction;Reverse Transcriptase Polymerase Chain Reaction;Signal Tra…	-1.66672	24.0203	4.0198	Stem cell	80
25469866	2014	Journal of proteome research	Nie, Song;Gurrea, Mikel;Zhu, Jianhui;Thakolwiboon, Smathorn;Heth, Jason A;Muraszko, Karin M;Fan, Xing;Lubman, David M	Tenascin-C: a novel candidate marker for cancer stem cells in glioblastoma identified by tissue microarrays.	Glioblastoma multiforme (GBM) is a highly aggressive brain tumor, with dismal survival outcomes. Recently, cancer stem cells (CSCs) have been demonstrated to play a role in therapeutic resistance and are considered to be the most likely cause of cancer relapse. The identification of CSCs is an important step toward finding new and effective ways to treat GBM. Tenascin-C (TNC) protein has been ide…	Journal Article	eng	PMC4320683	10.1021/pr5008653	Adolescent;Adult;Biomarkers, Tumor;Brain Neoplasms;Female;Glioblastoma;Humans;Immunohistochemistry;Male;Middle Aged;Neoplastic Stem Cells;Tenascin;Tissue Array Analysis;Tumor Cells, Cultured;Young Adult	-4.84559	30.0697	10.6515	Stem cell	80
25303679	2014	Cell transplantation	Bryukhovetskiy, Andrey;Shevchenko, Valeriy;Kovalev, Sergey;Chekhonin, Vladimir;Baklaushev, Vladimir;Bryukhovetskiy, Igor;Zhukova, Maria	To the novel paradigm of proteome-based cell therapy of tumors: through comparative proteome mapping of tumor stem cells and tissue-specific stem cells of humans.	We performed proteome mapping (PM), cataloging, and bioinformation analysis of protein lysates of human neural (CD133(+)) progenitor and stem cells (NPSCs) isolated from the olfactory sheath of a nose, multipotent mesenchymal (CD29(+), CD44(+), CD73(+), CD90(+), CD34(-)) stromal cells (MMSCs) isolated from human bone marrow, and tumor (CD133(+)) stem cells (TSCs) isolated from the human U87 gliob…	Journal Article	eng		10.3727/096368914X684907	Brain Neoplasms;Cell Line, Tumor;Glioblastoma;Humans;Male;Membrane Proteins;Mesenchymal Stem Cells;Neoplastic Stem Cells;Neural Stem Cells;Nuclear Proteins;Organ Specificity;Proteome;Signal Transduction;Stem Cell Transplantation	-2.29167	26.3208	2.94712	Stem cell	80
25289892	2014	Journal of neuropathology and experimental neurology	Ahmad, Mushfika;Frei, Karl;Willscher, Edith;Stefanski, Anja;Kaulich, Kerstin;Roth, Patrick;Stühler, Kai;Reifenberger, Guido;Binder, Hans;Weller, Michael	How stemlike are sphere cultures from long-term cancer cell lines? Lessons from mouse glioma models.	Cancer stem cells may mediate therapy resistance and recurrence in various types of cancer, including glioblastoma. Cancer stemlike cells can be isolated from long-term cancer cell lines, including glioma lines. Using sphere formation as a model for cancer cell stemness in vitro, we derived sphere cultures from SMA-497, SMA-540, SMA-560, and GL-261 glioma cells. Gene expression and proteomics pro…	Journal Article	eng		10.1097/NEN.0000000000000130	Animals;Cell Line, Tumor;Glioma;Mice;Mice, Inbred C57BL;Neoplastic Stem Cells	-3.94139	22.1405	1.80277	Stem cell	80
25088051	2014	Journal of proteomics	Collet, Brigitte;Avril, Tony;Aubry, Marc;Hamlat, Abderrahmane;Le Reste, Pierre-Jean;Chiforeanu, Dan;Vauleon, Elodie;Mosser, Jean;Quillien, Véronique	Proteomic analysis underlines the usefulness of both primary adherent and stem-like cell lines for studying proteins involved in human glioblastoma.	Primary cell lines derived as neurospheres, enriched in cancer stem cells, are currently the focus of interest in glioblastoma to test new drugs, because of their tumor initiating abilities and resistance to conventional therapies. However, not all glioblastoma samples are propagatable under neurosphere culture and not all neurosphere cell lines are tumorigenic. These cells therefore cannot recap…	Journal Article	eng		10.1016/j.jprot.2014.07.022	Aged;Amino Acid Sequence;Brain Neoplasms;Cell Adhesion;Cell Line, Tumor;Female;Glioblastoma;Humans;Male;Middle Aged;Molecular Sequence Data;Neoplasm Proteins;Neoplastic Stem Cells;Proteome;Spheroids, Cellular	-2.03323	26.2483	3.50062	Stem cell	80
25078449	2014	Molecules and cells	Jung, Yuchae;Park, Heejoo;Zhao, Hui-Yuan;Jeon, Raok;Ryu, Jae-Ha;Kim, Woo-Young	Systemic approaches identify a garlic-derived chemical, Z-ajoene, as a glioblastoma multiforme cancer stem cell-specific targeting agent.	Glioblastoma multiforme (GBM) is one of the most common brain malignancies and has a very poor prognosis. Recent evidence suggests that the presence of cancer stem cells (CSC) in GBM and the rare CSC subpopulation that is resistant to chemotherapy may be responsible for the treatment failure and unfavorable prognosis of GBM. A garlic-derived compound, Z-ajoene, has shown a range of biological act…	Journal Article	eng	PMC4132307	10.14348/molcells.2014.0158	Disulfides;Drug Resistance, Neoplasm;Forkhead Box Protein O3;Forkhead Transcription Factors;Garlic;Gene Expression Regulation, Developmental;Glioblastoma;Growth Inhibitors;Hedgehog Proteins;Humans;MAP Kinase Signaling System;Molecular Targeted Therapy;Neoplastic Stem Cells;Oncogene Protein v-akt;Receptors, Notch;Smad4 Protein;Transforming Growth Factor beta1;Tumor Cells, Cultured;Wnt Proteins	-2.00979	32.3931	6.81304	Stem cell	80
24599129	2014	Cancer research	Favaro, Rebecca;Appolloni, Irene;Pellegatta, Serena;Sanga, Alexandra Badiola;Pagella, Pierfrancesco;Gambini, Eleonora;Pisati, Federica;Ottolenghi, Sergio;Foti, Maria;Finocchiaro, Gaetano;Malatesta, Paolo;Nicolis, Silvia K	Sox2 is required to maintain cancer stem cells in a mouse model of high-grade oligodendroglioma.	The stem cell-determining transcription factor Sox2 is required for the maintenance of normal neural stem cells. In this study, we investigated the requirement for Sox2 in neural cancer stem-like cells using a conditional genetic deletion mutant in a mouse model of platelet-derived growth factor-induced malignant oligodendroglioma. Transplanting wild-type oligodendroglioma cells into the brain ge…	Journal Article	eng		10.1158/0008-5472.CAN-13-1942	Animals;Brain Neoplasms;Cancer Vaccines;Cell Line, Tumor;Cell Proliferation;Female;Immunotherapy;Mice;Mice, Inbred C57BL;Mice, Transgenic;Neoplastic Stem Cells;Oligodendroglioma;Peptide Fragments;SOXB1 Transcription Factors;Transcriptome;Tumor Cells, Cultured	-4.79518	22.5517	3.41716	Stem cell	80
23954875	2013	Gene	Malchenko, Sergey;Xie, Jianping;de Fatima Bonaldo, Maria;Vanin, Elio F;Bhattacharyya, Bula J;Belmadani, Abdelhak;Xi, Guifa;Galat, Vasily;Goossens, William;Seftor, Richard E B;Tomita, Tadanori;Crispino, John;Miller, Richard J;Bohn, Martha C;Hendrix, Mary J C;Soares, Marcelo B	Onset of rosette formation during spontaneous neural differentiation of hESC and hiPSC colonies.	In vitro neural differentiation of human embryonic stem cells (hESCs) is an advantageous system for studying early neural development. The process of early neural differentiation in hESCs begins by initiation of primitive neuroectoderm, which is manifested by rosette formation, with consecutive differentiation into neural progenitors and early glial-like cells. In this study, we examined the invo…	Journal Article	eng		10.1016/j.gene.2013.07.101	Animals;Biomarkers;Cell Differentiation;Cell Line;Dopaminergic Neurons;Down-Regulation;Embryonic Stem Cells;HEK293 Cells;Humans;Male;Mice;Mice, Inbred NOD;Mice, SCID;Motor Cortex;Octamer Transcription Factor-3;Otx Transcription Factors;Pluripotent Stem Cells;Rosette Formation;Serotonergic Neurons	-6.03255	22.4788	6.04974	Stem cell	80
23836528	2013	Journal of cellular biochemistry	Chen, Song;Zhao, Hongxin;Deng, Jinmu;Liao, Peng;Xu, Zhongye;Cheng, Yuan	Comparative proteomics of glioma stem cells and differentiated tumor cells identifies S100A9 as a potential therapeutic target.	Recent studies have suggested the existence of a small subset of cancer cells called cancer stem cells (CSCs), which possess the ability to initiate malignancies, promote tumor formation, drive metastasis, and evade conventional chemotherapies. Elucidation of the specific signaling pathway and mechanism underlying the action of CSCs might improve the efficacy of cancer treatments. In this study, …	Journal Article	eng		10.1002/jcb.24626	Animals;Brain Neoplasms;Calgranulin B;Cell Differentiation;Cell Line, Tumor;Gene Expression Regulation, Neoplastic;Glioma;Humans;Mice;Molecular Targeted Therapy;Neoplasm Proteins;Neoplastic Stem Cells;Proteomics;Signal Transduction;Xenograft Model Antitumor Assays	-3.58947	30.8096	6.24709	Stem cell	80
23824572	2013	Development (Cambridge, England)	Cayre, Myriam;Courtès, Sandrine;Martineau, Fanny;Giordano, Marilyn;Arnaud, Karen;Zamaron, Amandine;Durbec, Pascale	Netrin 1 contributes to vascular remodeling in the subventricular zone and promotes progenitor emigration after demyelination.	Neural stem cells are maintained in the adult brain, sustaining structural and functional plasticity and to some extent participating in brain repair. A thorough understanding of the mechanisms and factors involved in endogenous stem/progenitor cell mobilization is a major challenge in the promotion of spontaneous brain repair. The main neural stem cell niche in the adult brain is the subventricu…	Journal Article	eng		10.1242/dev.092999	Animals;Brain;Cell Movement;Corpus Callosum;Demyelinating Diseases;Mice;Mice, Inbred C57BL;Mice, Transgenic;Models, Neurological;Neovascularization, Physiologic;Nerve Growth Factors;Netrin-1;Neural Stem Cells;Stem Cell Niche;Transcriptome;Tumor Suppressor Proteins	-4.61848	20.7175	4.23307	Stem cell	80
23814495	2013	Neoplasia (New York, N.Y.)	Richichi, Cristina;Brescia, Paola;Alberizzi, Valeria;Fornasari, Lorenzo;Pelicci, Giuliana	Marker-independent method for isolating slow-dividing cancer stem cells in human glioblastoma.	Glioblastoma (GBM) is a devastating brain tumor with a poor survival outcome. It is generated and propagated by a small subpopulation of rare and hierarchically organized cells that share stem-like features with normal stem cells but, however, appear dysregulated in terms of self-renewal and proliferation and aberrantly differentiate into cells forming the bulk of the disorganized cancer tissues.…	Journal Article	eng	PMC3689246	10.1593/neo.13662	Animals;Antigens, Surface;Brain Neoplasms;Cell Cycle;Cell Separation;Cell Transformation, Neoplastic;Flow Cytometry;Glioblastoma;Heterografts;Humans;Immunophenotyping;Mice;Neoplastic Stem Cells;Organic Chemicals;Spheroids, Cellular;Transcriptome;Tumor Cells, Cultured;Tumor Stem Cell Assay	-1.67018	30.2392	6.07287	Stem cell	80
23512659	2013	Genes &amp; development	Stricker, Stefan H;Feber, Andrew;Engström, Pär G;Carén, Helena;Kurian, Kathreena M;Takashima, Yasuhiro;Watts, Colin;Way, Michael;Dirks, Peter;Bertone, Paul;Smith, Austin;Beck, Stephan;Pollard, Steven M	Widespread resetting of DNA methylation in glioblastoma-initiating cells suppresses malignant cellular behavior in a lineage-dependent manner.	Epigenetic changes are frequently observed in cancer. However, their role in establishing or sustaining the malignant state has been difficult to determine due to the lack of experimental tools that enable resetting of epigenetic abnormalities. To address this, we applied induced pluripotent stem cell (iPSC) reprogramming techniques to invoke widespread epigenetic resetting of glioblastoma (GBM)-…	Journal Article	eng	PMC3613612	10.1101/gad.212662.112	Animals;Cell Differentiation;Cell Line, Tumor;Cell Lineage;Cell Transformation, Neoplastic;Cellular Reprogramming;DNA Methylation;Epigenesis, Genetic;Gene Expression Profiling;Gene Expression Regulation, Neoplastic;Glioblastoma;Humans;Mice;Mice, Inbred NOD;Neural Stem Cells;Pluripotent Stem Cells;Transplantation, Heterologous	1.7965	22.1353	4.40815	Stem cell	80
23406356	2013	Journal of neurochemistry	Chen, Can;Wang, Yi;Goh, Sally S L;Yang, Jing;Lam, Dang Hoang;Choudhury, Yukti;Tay, Felix Chang;Du, Shouhui;Tan, Wee Kiat;Purwanti, Yovita Ida;Fan, Weimin;Wang, Shu	Inhibition of neuronal nitric oxide synthase activity promotes migration of human-induced pluripotent stem cell-derived neural stem cells toward cancer cells.	The breakthrough in derivation of human-induced pluripotent stem cells (hiPSCs) provides an approach that may help overcome ethical and allergenic challenges posed in numerous medical applications involving human cells, including neural stem/progenitor cells (NSCs). Considering the great potential of NSCs in targeted cancer gene therapy, we investigated in this study the tumor tropism of hiPSC-de…	Journal Article	eng		10.1111/jnc.12199	Animals;Cell Line, Tumor;Cell Movement;Female;Gene Knockdown Techniques;Humans;Induced Pluripotent Stem Cells;Mice;Mice, Nude;Neoplasms;Neural Stem Cells;Nitric Oxide Synthase Type I;Oligonucleotide Array Sequence Analysis;Real-Time Polymerase Chain Reaction;Transcriptome	-3.05708	23.7669	4.29029	Stem cell	80
23046790	2012	Genome medicine	Engström, Pär G;Tommei, Diva;Stricker, Stefan H;Ender, Christine;Pollard, Steven M;Bertone, Paul	Digital transcriptome profiling of normal and glioblastoma-derived neural stem cells identifies genes associated with patient survival.	BACKGROUND: Glioblastoma multiforme, the most common type of primary brain tumor in adults, is driven by cells with neural stem (NS) cell characteristics. Using derivation methods developed for NS cells, it is possible to expand tumorigenic stem cells continuously in vitro. Although these glioblastoma-derived neural stem (GNS) cells are highly similar to normal NS cells, they harbor mutations typ…	Journal Article	eng	PMC3556652	10.1186/gm377		-2.55165	22.3379	3.76727	Stem cell	80
22986529	2012	Oncogene	Katz, S G;Fisher, J K;Correll, M;Bronson, R T;Ligon, K L;Walensky, L D	Brain and testicular tumors in mice with progenitor cells lacking BAX and BAK.	The proapoptotic BCL-2 family proteins BAX and BAK serve as essential gatekeepers of the intrinsic apoptotic pathway and, when activated, transform into pore-forming homo-oligomers that permeabilize the mitochondrial outer membrane. Deletion of Bax and Bak causes marked resistance to death stimuli in a variety of cell types. Bax(-/-)Bak(-/-) mice are predominantly non-viable and survivors exhibit…	Journal Article	eng	PMC3529761	10.1038/onc.2012.421	Animals;Brain Neoplasms;Hyperplasia;Intermediate Filament Proteins;Male;Megalencephaly;Mice;Nerve Tissue Proteins;Nestin;Neural Stem Cells;Neurons;Testicular Neoplasms;Transcriptome;Tumor Suppressor Protein p53;bcl-2 Homologous Antagonist-Killer Protein;bcl-2-Associated X Protein	-5.4694	20.8572	4.06156	Stem cell	80
22909066	2012	Genome biology	Palmer, Nathan P;Schmid, Patrick R;Berger, Bonnie;Kohane, Isaac S	A gene expression profile of stem cell pluripotentiality and differentiation is conserved across diverse solid and hematopoietic cancers.	BACKGROUND: Understanding the fundamental mechanisms of tumorigenesis remains one of the most pressing problems in modern biology. To this end, stem-like cells with tumor-initiating potential have become a central focus in cancer research. While the cancer stem cell hypothesis presents a compelling model of self-renewal and partial differentiation, the relationship between tumor cells and normal …	Journal Article	eng	PMC3491371	10.1186/gb-2012-13-8-r71	Animals;Cell Differentiation;Cell Line;Cell Proliferation;Cell Transformation, Neoplastic;Databases, Genetic;Embryonic Stem Cells;Humans;Mice;Microarray Analysis;Pluripotent Stem Cells;Transcription, Genetic;Transcriptome	-3.78066	25.477	4.4351	Stem cell	80
22689954	2012	Proceedings of the National Academy of Sciences of the United States of America	Yun, Seong-Wook;Leong, Cheryl;Zhai, Duanting;Tan, Yee Ling;Lim, Linda;Bi, Xuezhi;Lee, Jae-Jung;Kim, Han Jo;Kang, Nam-Young;Ng, Shin Hui;Stanton, Lawrence W;Chang, Young-Tae	Neural stem cell specific fluorescent chemical probe binding to FABP7.	Fluorescent small molecules have become indispensable tools for biomedical research along with the rapidly developing optical imaging technology. We report here a neural stem cell specific boron-dipyrromethane (BODIPY) derivative compound of designation red 3 (CDr3), developed through a high throughput/content screening of in-house generated diversity oriented fluorescence library in stem cells a…	Journal Article	eng	PMC3387064	10.1073/pnas.1200817109	Animals;Carrier Proteins;Cell Proliferation;Fatty Acid-Binding Protein 7;Fatty Acid-Binding Proteins;Fluorescent Dyes;Humans;Mice;Nerve Tissue Proteins;Neural Stem Cells;Protein Binding;Tumor Suppressor Proteins	-4.01158	26.5181	3.68095	Stem cell	80
22684456	2012	Cancer discovery	Wortham, Matthew;Yan, Hai	Apples to origins: identifying brain tumor stem cell genes by comparing transcriptomes of normal and cancer stem cells.	The mechanisms whereby medulloblastoma stem cells coordinate tumor propagation are poorly understood. Using microarray analysis, Corno and colleagues draw parallels and distinctions between medulloblastoma stem cells from the Ptch(+/-) mouse and normal neural stem cells, identifying Ebf3 as a cancer stem cell-specific transcript critical for tumor growth.	Journal Article	eng	PMC3375910	10.1158/2159-8290.CD-12-0182	Animals;Cerebellar Neoplasms;Gene Expression Profiling;Humans;Medulloblastoma	-5.49449	25.8855	4.47479	Stem cell	80
22624064	2012	PloS one	Xu, David S;Yang, Chunzhang;Proescholdt, Martin;Bründl, Elisabeth;Brawanski, Alexander;Fang, Xueping;Lee, Cheng S;Weil, Robert J;Zhuang, Zhengping;Lonser, Russell R	Neuronatin in a subset of glioblastoma multiforme tumor progenitor cells is associated with increased cell proliferation and shorter patient survival.	Glioblastoma multiforme is the most common and malignant primary brain tumor. Recent evidence indicates that a subset of glioblastoma tumor cells have a stem cell like phenotype that underlies chemotherapy resistance and tumor recurrence. We utilized a new &quot;multidimensional&quot; capillary isoelectric focusing nano-reversed-phase liquid chromatography platform with tandem mass spectrometry t…	Journal Article	eng	PMC3356299	10.1371/journal.pone.0037811	Biomarkers;Cell Proliferation;Chromatography, Liquid;Glioblastoma;Humans;Isoelectric Focusing;Kaplan-Meier Estimate;Membrane Proteins;Neoplastic Stem Cells;Nerve Tissue Proteins;Protein Isoforms;Proteomics;Tandem Mass Spectrometry	-1.22569	20.4466	3.76901	Stem cell	80
22203689	2011	Molecular &amp; cellular proteomics : MCP	He, Jintang;Liu, Yashu;Zhu, Thant;Zhu, Jianhui;Dimeco, Francesco;Vescovi, Angelo L;Heth, Jason A;Muraszko, Karin M;Fan, Xing;Lubman, David M	CD90 is identified as a candidate marker for cancer stem cells in primary high-grade gliomas using tissue microarrays.	Although CD90 has been identified as a marker for various kinds of stem cells including liver cancer stem cells (CSCs) that are responsible for tumorigenesis, the potential role of CD90 as a marker for CSCs in gliomas has not been characterized. To address the issue, we investigated the expression of CD90 in tissue microarrays containing 15 glioblastoma multiformes (GBMs), 19 WHO grade III astroc…	Journal Article	eng	PMC3433900	10.1074/mcp.M111.010744	AC133 Antigen;Adult;Antigens, CD;Astrocytoma;Biomarkers, Tumor;Brain Neoplasms;Case-Control Studies;Female;Glycoproteins;Humans;Male;Middle Aged;Neoplastic Stem Cells;Peptides;Platelet Endothelial Cell Adhesion Molecule-1;Spheroids, Cellular;Thy-1 Antigens;Tissue Array Analysis;Young Adult	-4.84012	30.0654	10.6406	Stem cell	80
21932445	2011	Proteomics	Dai, Lan;He, Jintang;Liu, Yashu;Byun, Jaeman;Vivekanandan, Anuradha;Pennathur, Subramaniam;Fan, Xing;Lubman, David M	Dose-dependent proteomic analysis of glioblastoma cancer stem cells upon treatment with γ-secretase inhibitor.	Notch signaling has been demonstrated to have a central role in glioblastoma (GBM) cancer stem cells (CSCs) and we have demonstrated recently that Notch pathway blockade by γ-secretase inhibitor (GSI) depletes GBM CSCs and prevents tumor propagation both in vitro and in vivo. In order to understand the proteome alterations involved in this transformation, a dose-dependent quantitative mass spectr…	Journal Article	eng	PMC3517080	10.1002/pmic.201000730	Amyloid Precursor Protein Secretases;Apoptosis;Blotting, Western;Brain Neoplasms;Cell Differentiation;Cell Proliferation;Enzyme Inhibitors;Glioblastoma;Humans;Neoplastic Stem Cells;Proteome;Receptors, Notch;Signal Transduction;Tumor Cells, Cultured	-1.86816	31.3782	6.80795	Stem cell	80
21898824	2011	Proteomics	Dai, Lan;Liu, Yashu;He, Jintang;Flack, Callie G;Talsma, Caroline E;Crowley, Jessica G;Muraszko, Karin M;Fan, Xing;Lubman, David M	Differential profiling studies of N-linked glycoproteins in glioblastoma cancer stem cells upon treatment with γ-secretase inhibitor.	We have recently demonstrated that Notch pathway blockade by γ-secretase inhibitor (GSI) depletes cancer stem cells (CSCs) in Glioblastoma Multiforme (GBM) through reduced proliferation and induced apoptosis. However, the detailed mechanism by which the manipulation of Notch signal induces alterations on post-translational modifications such as glycosylation has not been investigated. Herein, we …	Journal Article	eng	PMC3235004	10.1002/pmic.201100014	Amyloid Precursor Protein Secretases;Blotting, Western;Enzyme Inhibitors;Gene Expression Profiling;Glioblastoma;Glycoproteins;Humans;Lectins;Neoplastic Stem Cells;Protein Array Analysis	-2.05456	31.2735	6.71046	Stem cell	80
21737130	2011	Cell	Liu, Chong;Sage, Jonathan C;Miller, Michael R;Verhaak, Roel G W;Hippenmeyer, Simon;Vogel, Hannes;Foreman, Oded;Bronson, Roderick T;Nishiyama, Akiko;Luo, Liqun;Zong, Hui	Mosaic analysis with double markers reveals tumor cell of origin in glioma.	Cancer cell of origin is difficult to identify by analyzing cells within terminal stage tumors, whose identity could be concealed by the acquired plasticity. Thus, an ideal approach to identify the cell of origin is to analyze proliferative abnormalities in distinct lineages prior to malignancy. Here, we use mosaic analysis with double markers (MADM) in mice to model gliomagenesis by initiating c…	Journal Article	eng	PMC3143261	10.1016/j.cell.2011.06.014	Animals;Astrocytes;Biomarkers;Brain Neoplasms;Genes, p53;Glioma;Mice;Molecular Sequence Data;Mosaicism;Mutation;Neoplastic Stem Cells;Neural Stem Cells;Neurofibromin 1;Neurons;Oligodendroglia	-5.56968	20.3408	3.10428	Stem cell	80
21220328	2011	Proceedings of the National Academy of Sciences of the United States of America	Yan, Xiaowei;Ma, Li;Yi, Danielle;Yoon, Jae-geun;Diercks, Alan;Foltz, Gregory;Price, Nathan D;Hood, Leroy E;Tian, Qiang	A CD133-related gene expression signature identifies an aggressive glioblastoma subtype with excessive mutations.	Cancer cells are heterogeneous and, it has been proposed, fall into at least two classes: the tumor-initiating cancer stem cells (CSC) and the more differentiated tumor cells. The transmembrane protein CD133 has been widely used to isolate putative CSC populations in several cancer types, but its validity as a CSC marker and hence its clinical ramifications remain controversial. Here, we conducte…	Journal Article	eng	PMC3029739	10.1073/pnas.1018696108	AC133 Antigen;Antigens, CD;Cluster Analysis;Embryonic Stem Cells;Flow Cytometry;Gene Expression Profiling;Gene Expression Regulation, Neoplastic;Glioblastoma;Glycoproteins;Humans;Immunohistochemistry;Neoplastic Stem Cells;Neural Stem Cells;Oligonucleotide Array Sequence Analysis;Peptides;Tumor Cells, Cultured	-1.38065	29.8234	5.98508	Stem cell	80
21110520	2010	Journal of proteome research	He, Jintang;Liu, Yashu;Zhu, Thant S;Xie, Xiaolei;Costello, Mark A;Talsma, Caroline E;Flack, Callie G;Crowley, Jessica G;Dimeco, Francesco;Vescovi, Angelo L;Fan, Xing;Lubman, David M	Glycoproteomic analysis of glioblastoma stem cell differentiation.	Cancer stem cells are responsible for tumor formation through self-renewal and differentiation into multiple cell types and thus represent a new therapeutic target for tumors. Glycoproteins play a critical role in determining the fates of stem cells such as self-renewal, proliferation, and differentiation. Here we applied a multilectin affinity chromatography and quantitative glycoproteomics appr…	Journal Article	eng	PMC3017630	10.1021/pr101158p	Blotting, Western;Cell Differentiation;Cell Line, Tumor;Cell Shape;Chromatography, Affinity;Chromatography, Liquid;Cluster Analysis;Databases, Protein;Glioblastoma;Glycoproteins;Humans;Lysosomes;Microscopy, Phase-Contrast;Neoplastic Stem Cells;Plant Lectins;Protein Interaction Mapping;Proteomics;Tandem Mass Spectrometry	-2.98205	26.4501	3.68044	Stem cell	80
20878131	2010	Oncology reports	Schiapparelli, Paula;Enguita-Germán, Mónica;Balbuena, Jana;Rey, Juan A;Lázcoz, Paula;Castresana, Javier S	Analysis of stemness gene expression and CD133 abnormal methylation in neuroblastoma cell lines.	Neuroblastoma is the most common extracranial solid tumor in children, accounting for up to 10% of all childhood malignancies. Cellular heterogeneity is a hallmark of this embryonal cancer, as distinct neural crest lineages can be found within the same tumor sample. The aim of our study was to investigate the presence of a subpopulation of immature cells with features of cancer-like stem cells in…	Journal Article	eng		10.3892/or_00000993	AC133 Antigen;Antigens, CD;Cell Line, Tumor;DNA Methylation;Epigenomics;Flow Cytometry;Gene Expression Regulation, Neoplastic;Glycoproteins;Humans;Neoplastic Stem Cells;Neuroblastoma;Peptides;Reverse Transcriptase Polymerase Chain Reaction	-3.22081	23.6791	4.83904	Stem cell	80
20843775	2010	Neuro-oncology	Vik-Mo, Einar Osland;Sandberg, Cecilie;Olstorn, Havard;Varghese, Mercy;Brandal, Petter;Ramm-Pettersen, Jon;Murrell, Wayne;Langmoen, Iver Arne	Brain tumor stem cells maintain overall phenotype and tumorigenicity after in vitro culturing in serum-free conditions.	Traditional in vitro culturing of tumor cells has been shown to induce changes so that cultures no longer represent the tumor of origin. Serum-free culturing conditions are used in a variety of cancers to propagate stem-like cells in vitro. Limited reports, however, exist on the effects of such propagation. We have compared cells from brain tumor biopsies cultivated under serum-free conditions at…	Journal Article	eng	PMC3018941	10.1093/neuonc/noq102	Animals;Astrocytoma;Biomarkers, Tumor;Brain Neoplasms;Cell Culture Techniques;Chromosome Aberrations;Comparative Genomic Hybridization;Culture Media, Serum-Free;DNA, Neoplasm;Gene Expression Profiling;Humans;Karyotyping;Mice;Mice, SCID;Neoplastic Stem Cells;Oligonucleotide Array Sequence Analysis;Phenotype;Polymerase Chain Reaction;RNA, Neoplasm;Signal Transduction;Transplantation, Heterologous;T…	-3.8188	21.9131	2.13205	Stem cell	80
20478531	2010	Cancer cell	Zheng, Hongwu;Ying, Haoqiang;Wiedemeyer, Ruprecht;Yan, Haiyan;Quayle, Steven N;Ivanova, Elena V;Paik, Ji-Hye;Zhang, Hailei;Xiao, Yonghong;Perry, Samuel R;Hu, Jian;Vinjamoori, Anant;Gan, Boyi;Sahin, Ergun;Chheda, Milan G;Brennan, Cameron;Wang, Y Alan;Hahn, William C;Chin, Lynda;DePinho, Ronald A	PLAGL2 regulates Wnt signaling to impede differentiation in neural stem cells and gliomas.	A hallmark feature of glioblastoma is its strong self-renewal potential and immature differentiation state, which contributes to its plasticity and therapeutic resistance. Here, integrated genomic and biological analyses identified PLAGL2 as a potent protooncogene targeted for amplification/gain in malignant gliomas. Enhanced PLAGL2 expression strongly suppresses neural stem cell (NSC) and glioma…	Journal Article	eng	PMC2900858	10.1016/j.ccr.2010.03.020	Animals;Cell Differentiation;Cell Transformation, Neoplastic;DNA-Binding Proteins;Glioblastoma;Humans;Mice;RNA-Binding Proteins;Signal Transduction;Stem Cells;Transcription Factors;Wnt Proteins	-5.06383	25.8485	6.6654	Stem cell	80
20235609	2010	Journal of proteome research	He, Jintang;Liu, Yashu;Xie, Xiaolei;Zhu, Thant;Soules, Mary;DiMeco, Francesco;Vescovi, Angelo L;Fan, Xing;Lubman, David M	Identification of cell surface glycoprotein markers for glioblastoma-derived stem-like cells using a lectin microarray and LC-MS/MS approach.	Despite progress in the treatment of glioblastoma, more than 95% of patients suffering from this disease still die within 2 years. Recent findings support the belief that cancer stem-like cells are responsible for tumor formation and ongoing growth. Here a method combining lectin microarray and LC-MS/MS was used to discover the cell surface glycoprotein markers of a glioblastoma-derived stem-like…	Journal Article	eng	PMC2866009	10.1021/pr100012p	Amino Acid Sequence;Biomarkers, Tumor;Blotting, Western;Cell Line, Tumor;Chromatography, Liquid;Glioblastoma;Humans;Membrane Glycoproteins;Molecular Sequence Data;Neoplastic Stem Cells;Plant Lectins;Protein Array Analysis;Subcellular Fractions;Tandem Mass Spectrometry	-2.36411	26.3553	3.3447	Stem cell	80
20199106	2010	Journal of proteome research	He, Huan;Nilsson, Carol L;Emmett, Mark R;Marshall, Alan G;Kroes, Roger A;Moskal, Joseph R;Ji, Yongjie;Colman, Howard;Priebe, Waldemar;Lang, Frederick F;Conrad, Charles A	Glycomic and transcriptomic response of GSC11 glioblastoma stem cells to STAT3 phosphorylation inhibition and serum-induced differentiation.	A glioblastoma stem cell (GSC) line, GSC11, grows as neurospheres in serum-free media supplemented with EGF (epidermal growth factor) and bFGF (basic fibroblast growth factor), and, if implanted in nude mice brains, will recapitulate high-grade glial tumors. Treatment with a STAT3 (signal transducer and activator of transcription 3) phosphorylation inhibitor (WP1193) or 10% FBS (fetal bovine seru…	Journal Article	eng		10.1021/pr900793a	AC133 Antigen;Animals;Antigens, CD;Cattle;Culture Media;Gene Expression Profiling;Gene Expression Regulation, Neoplastic;Glioblastoma;Globosides;Glycolipids;Glycoproteins;Humans;Molecular Sequence Data;Neoplastic Stem Cells;Oligonucleotide Array Sequence Analysis;Peptides;Phenotype;Phospholipids;Phosphorylation;Reverse Transcriptase Polymerase Chain Reaction;STAT3 Transcription Factor;Serum;Tande…	-3.28722	26.0381	7.30896	Stem cell	80
20181261	2010	BMC cancer	Patru, Cristina;Romao, Luciana;Varlet, Pascale;Coulombel, Laure;Raponi, Eric;Cadusseau, Josette;Renault-Mihara, François;Thirant, Cécile;Leonard, Nadine;Berhneim, Alain;Mihalescu-Maingot, Maria;Haiech, Jacques;Bièche, Ivan;Moura-Neto, Vivaldo;Daumas-Duport, Catherine;Junier, Marie-Pierre;Chneiweiss, Hervé	CD133, CD15/SSEA-1, CD34 or side populations do not resume tumor-initiating properties of long-term cultured cancer stem cells from human malignant glio-neuronal tumors.	BACKGROUND: Tumor initiating cells (TICs) provide a new paradigm for developing original therapeutic strategies.METHODS: We screened for TICs in 47 human adult brain malignant tumors. Cells forming floating spheres in culture, and endowed with all of the features expected from tumor cells with stem-like properties were obtained from glioblastomas, medulloblastoma but not oligodendrogliomas.RESULT…	Journal Article	eng	PMC2841664	10.1186/1471-2407-10-66	AC133 Antigen;Animals;Antigens, CD;Antigens, CD34;Brain Neoplasms;Cell Line, Tumor;Gene Expression Regulation, Neoplastic;Glioma;Glycoproteins;Humans;Lewis X Antigen;Mice;Mice, Nude;Neoplasm Transplantation;Neoplastic Stem Cells;Neurons;Peptides;Proteomics	-3.89808	21.7791	2.78608	Stem cell	80
19899826	2009	Journal of proteome research	Nilsson, Carol L;Dillon, Roslyn;Devakumar, Arugadoss;Shi, Stone D-H;Greig, Michael;Rogers, John C;Krastins, Bryan;Rosenblatt, Michael;Kilmer, Gregory;Major, Michael;Kaboord, Barbara J;Sarracino, David;Rezai, Taha;Prakash, Amol;Lopez, Mary;Ji, Yongjie;Priebe, Waldemar;Lang, Frederick F;Colman, Howard;Conrad, Charles A	Quantitative phosphoproteomic analysis of the STAT3/IL-6/HIF1alpha signaling network: an initial study in GSC11 glioblastoma stem cells.	Initiation and maintenance of several cancers including glioblastoma (GBM) may be driven by a small subset of cells called cancer stem cells (CSCs). CSCs may provide a repository of cells in tumor cell populations that are refractory to chemotherapeutic agents developed for the treatment of tumors. STAT3 is a key transcription factor associated with regulation of multiple stem cell types. Recentl…	Journal Article	eng		10.1021/pr9007927	Blotting, Western;Chemokines;Chromatography, Liquid;Glioblastoma;Humans;Hypoxia;Hypoxia-Inducible Factor 1, alpha Subunit;Interleukin-6;Models, Biological;Neoplastic Stem Cells;Nitric Oxide Synthase Type II;Phosphopeptides;Phosphoproteins;Phosphorylation;Proteome;STAT3 Transcription Factor;Signal Transduction;Tandem Mass Spectrometry;Tryptophan	-2.13695	30.9774	6.80231	Stem cell	80
18845764	2008	Stem cells (Dayton, Ohio)	Chong, Yuk-Kien;Toh, Tan-Boon;Zaiden, Norazean;Poonepalli, Anuradha;Leong, Siew Hong;Ong, Catherine Ee Ling;Yu, Yiting;Tan, Patrick B;See, Siew-Ju;Ng, Wai-Hoe;Ng, Ivan;Hande, Manoor P;Kon, Oi Lian;Ang, Beng-Ti;Tang, Carol	Cryopreservation of neurospheres derived from human glioblastoma multiforme.	Cancer stem cells have been shown to initiate and sustain tumor growth. In many instances, clinical material is limited, compounded by a lack of methods to preserve such cells at convenient time points. Although brain tumor-initiating cells grown in a spheroid manner have been shown to maintain their integrity through serial transplantation in immune-compromised animals, practically, it is not al…	Journal Article	eng	PMC2729678	10.1634/stemcells.2008-0009	AC133 Antigen;Animals;Antigens, CD;Cell Aggregation;Cell Differentiation;Cell Proliferation;Cell Shape;Cell Survival;Cryopreservation;Gene Expression Regulation, Neoplastic;Glioblastoma;Glycoproteins;Humans;Karyotyping;Mice;Mice, SCID;Multipotent Stem Cells;Neoplastic Stem Cells;Neurons;Peptides;Spheroids, Cellular;Tumor Cells, Cultured;Xenograft Model Antitumor Assays	-3.23942	22.1194	2.97232	Stem cell	80
18341405	2008	Neurosurgical focus	Bleau, Anne-Marie;Howard, Brian M;Taylor, Lauren A;Gursel, Demirkan;Greenfield, Jeffrey P;Lim Tung, H Y;Holland, Eric C;Boockvar, John A	New strategy for the analysis of phenotypic marker antigens in brain tumor-derived neurospheres in mice and humans.	OBJECT: Brain tumor stem cells (TSCs) hypothetically drive the malignant phenotype of glioblastoma multiforme (GBM), and evidence suggests that a better understanding of these TSCs will have profound implications for treating gliomas. When grown in vitro, putative TSCs grow as a solid sphere, making their subsequent characterization, particularly the cells within the center of the sphere, difficu…	Journal Article	eng		10.3171/FOC/2008/24/3-4/E27	Animals;Biomarkers, Tumor;Brain Neoplasms;Glioblastoma;Glioma;Humans;Mice;Neoplastic Stem Cells;Nerve Tissue Proteins;Tumor Cells, Cultured	-2.88711	21.9808	2.62748	Stem cell	80
17593625	2007	Anticancer research	Heffron, Cynthia C B B;Gallagher, Michael F;Guenther, Simone;Sherlock, Jon;Henfrey, Richard;Martin, Cara;Sheils, Orla;O'Leary, John J	Global mRNA analysis to determine a transcriptome profile of cancer stemness in a mouse model.	BACKGROUND: Striking similarities between stem cells and cancer cells have led to the concept of the existence of a cancer stem cell, a concept that has since been documented in many tumours including breast, brain and prostate tumours. Teratocarcinomas are malignant tumours occurring predominantly in the testes composed of undifferentiated stem cells and mature tissues. Cancer stemness was studi…	Journal Article	eng			Animals;Cell Line, Tumor;Embryonal Carcinoma Stem Cells;Embryonic Stem Cells;Gene Expression Profiling;Gene Expression Regulation, Developmental;Gene Expression Regulation, Neoplastic;Mice;Neoplastic Stem Cells;Oligonucleotide Array Sequence Analysis;RNA, Messenger;Reverse Transcriptase Polymerase Chain Reaction;Teratocarcinoma;Transcription, Genetic	-3.78834	24.9394	3.35431	Stem cell	80
17312396	2007	Cell cycle (Georgetown, Tex.)	Park, Deric M;Li, Jie;Okamoto, Hiroaki;Akeju, Oluwaseun;Kim, Stephanie H;Lubensky, Irina;Vortmeyer, Alexander;Dambrosia, James;Weil, Robert J;Oldfield, Edward H;Park, John K;Zhuang, Zhengping	N-CoR pathway targeting induces glioblastoma derived cancer stem cell differentiation.	Nuclear receptor corepressor (N-CoR) is a critical regulator of neural stem cell differentiation. Nuclear localization of N-CoR is a feature of undifferentiated neural stem cells and cytoplasmic translocation of N-CoR leads to astrocytic differentiation. Comparative proteomic analysis of microdissected glioblastoma multiforme (GBM) specimens and matched normal glial tissue reveals increased expre…	Journal Article	eng		10.4161/cc.6.4.3856	Biomarkers;Brain Neoplasms;Cell Differentiation;Cell Proliferation;Drug Synergism;Glioblastoma;Humans;Neoplastic Stem Cells;Nuclear Proteins;Nuclear Receptor Co-Repressor 1;Okadaic Acid;Phosphorylation;Protein Transport;Repressor Proteins;Signal Transduction;Tretinoin;Tumor Cells, Cultured	2.14391	22.7649	3.10356	Stem cell	80
16962790	2006	Molecular and cellular neurosciences	Schüller, Ulrich;Kho, Alvin T;Zhao, Qing;Ma, Qiufu;Rowitch, David H	Cerebellar 'transcriptome' reveals cell-type and stage-specific expression during postnatal development and tumorigenesis.	Disorders of cerebellar development can result in neurological disease and cancer. The identity of transcription factors that may uniquely mark and/or regulate development of single cerebellar cell types, however, is poorly understood. We used a library of approximately 1100 probes for expression of transcription factor (TF)-encoding genes (&gt;70% of the mammalian 'transcriptome') to identify 22…	Journal Article	eng		10.1016/j.mcn.2006.07.010	Animals;Animals, Newborn;Cell Differentiation;Cerebellar Neoplasms;Cerebellum;Gene Expression Regulation, Developmental;Green Fluorescent Proteins;Immunohistochemistry;In Situ Hybridization;Mice;Mice, Inbred C57BL;Mice, Transgenic;Microarray Analysis;Neoplasms;Neuroglia;Neurons;Transcription Factors	-7.51006	19.4894	5.18116	Stem cell	80
16368933	2005	Development (Cambridge, England)	Meletis, Konstantinos;Wirta, Valtteri;Hede, Sanna-Maria;Nistér, Monica;Lundeberg, Joakim;Frisén, Jonas	p53 suppresses the self-renewal of adult neural stem cells.	There is increasing evidence that tumors are heterogeneous and that a subset of cells act as cancer stem cells. Several proto-oncogenes and tumor suppressors control key aspects of stem cell function, suggesting that similar mechanisms control normal and cancer stem cell properties. We show here that the prototypical tumor suppressor p53, which plays an important role in brain tumor initiation an…	Journal Article	eng		10.1242/dev.02208	Animals;Apoptosis;Cell Proliferation;Cells, Cultured;Gene Expression Profiling;Genes, p53;Male;Mice;Mice, Knockout;Models, Neurological;Neoplastic Stem Cells;Neurons;Oligonucleotide Array Sequence Analysis;Stem Cells;Transcription, Genetic;Tumor Suppressor Protein p53	-4.73966	25.9497	4.5144	Stem cell	80
23704872	2013	PloS one	Niibori-Nambu, Akiko;Midorikawa, Uichi;Mizuguchi, Souhei;Hide, Takuichiro;Nagai, Minako;Komohara, Yoshihiro;Nagayama, Megumi;Hirayama, Mio;Kobayashi, Daiki;Tsubota, Nobuyuki;Takezaki, Tatsuya;Makino, Keishi;Nakamura, Hideo;Takeya, Motohiro;Kuratsu, Junichi;Araki, Norie	Glioma initiating cells form a differentiation niche via the induction of extracellular matrices and integrin αV.	Glioma initiating cells (GICs) are considered responsible for the therapeutic resistance and recurrence of malignant glioma. To clarify the molecular mechanism of GIC maintenance/differentiation, we established GIC clones having the potential to differentiate into malignant gliomas, and subjected to DNA microarray/iTRAQ based integrated proteomics. 21,857 mRNAs and 8,471 proteins were identified …	Journal Article	eng	PMC3660593	10.1371/journal.pone.0059558	Animals;Brain Neoplasms;Carcinogenesis;Cell Adhesion;Cell Differentiation;Cell Movement;Cell Survival;Dacarbazine;Disease Progression;Extracellular Matrix;Fibronectins;Gene Expression Profiling;Gene Expression Regulation, Neoplastic;Gene Ontology;Glioma;Humans;Integrin alphaV;Mice;Neoplasm Proteins;Neoplastic Stem Cells;Oligopeptides;Proteomics;RNA, Messenger;Reproducibility of Results;Spheroids,…	-0.638503	7.56034	-0.142831	Glioma tumorigenesis	79
32093414	2020	Cells	Menezes, Weder Pereira de;Silva, Viviane Aline Oliveira;Gomes, Izabela Natália Faria;Rosa, Marcela Nunes;Spina, Maria Luisa Corcoll;Carloni, Adriana Cruvinel;Alves, Ana Laura Vieira;Melendez, Matias;Almeida, Gisele Caravina;Silva, Luciane Sussuchi da;Clara, Carlos;da Cunha, Isabela Werneck;Hajj, Glaucia Noeli Maroso;Jones, Chris;Bidinotto, Lucas Tadeu;Reis, Rui Manuel	Loss of 5'-Methylthioadenosine Phosphorylase (MTAP) is Frequent in High-Grade Gliomas; Nevertheless, it is Not Associated with Higher Tumor Aggressiveness.	The 5'-methylthioadenosine phosphorylase (MTAP) gene is located in the chromosomal region 9p21. MTAP deletion is a frequent event in a wide variety of human cancers; however, its biological role in tumorigenesis remains unclear. The purpose of this study was to characterize the MTAP expression profile in a series of gliomas and to associate it with patients' clinicopathological features. Moreover…	Journal Article	eng		10.3390/cells9020492		1.14296	9.87736	1.98866	Glioma tumorigenesis	79
31886582	2019	Journal of cellular biochemistry	Jiang, Yao;He, Jimin;Guo, Yongcan;Tao, Hualin;Pu, Fei;Li, Yiqin	Identification of genes related to low-grade glioma progression and prognosis based on integrated transcriptome analysis.	Glioma is one of the most common types of human brain tumor, with high mortality in high-grade gliomas (HGG). Low-grade gliomas (LGG) can progress into HGG, leading to poor prognosis. However, it is unclear what factors affect the progression of LGG to HGG. This study aims to explore the function of the crosstalk genes on the progression and prognosis of LGG using bioinformatics analysis. Integra…	Journal Article	eng		10.1002/jcb.29577		3.54231	8.25185	5.45253	Glioma tumorigenesis	79
31719831	2019	Frontiers in genetics	Xu, Jinyuan;Hou, Xiaobo;Pang, Lin;Sun, Shangqin;He, Shengyuan;Yang, Yiran;Liu, Kun;Xu, Linfu;Yin, Wenkang;Xu, Chaohan;Xiao, Yun	Identification of Dysregulated Competitive Endogenous RNA Networks Driven by Copy Number Variations in Malignant Gliomas.	Gliomas represent 80% of malignant brain tumors. Because of the high heterogeneity, the oncogenic mechanisms in gliomas are still unclear. In this study, we developed a new approach to identify dysregulated competitive endogenous RNA (ceRNA) interactions driven by copy number variation (CNV) in both lower-grade glioma (LGG) and glioblastoma multiforme (GBM). By analyzing genome and transcriptome …	Journal Article	eng	PMC6827427	10.3389/fgene.2019.01055		3.84352	8.39977	5.11785	Glioma tumorigenesis	79
31711240	2019	Neuro-oncology	Capdevielle, Caroline;Desplat, Angélique;Charpentier, Justine;Saggliocco, Francis;Thiebaud, Pierre;Thézé, Nadine;Fédou, Sandrine;Hooks, Katarzyna B;Silvestri, Romano;Guyonnet-Duperat, Veronique;Pretel, Mélina;Raymond, Anne-Aurélie;Dupuy, Jean-William;Grosset, Christophe F;Hagedorn, Martin	HDAC inhibition induces expression of scaffolding proteins critical for tumor progression in pediatric glioma: focus on EBP50 and IRSp53.	BACKGROUND: Diffuse midline glioma (DMG) is a pediatric malignancy with poor prognosis. Most children die less than one year after diagnosis. Recently, mutations in histone H3 have been identified and are believed to be oncogenic drivers. Targeting this epigenetic abnormality using HDAC inhibitors such as panobinostat (PS) is therefore a novel therapeutic option currently evaluated in clinical tr…	Journal Article	eng		10.1093/neuonc/noz215		0.364635	7.61764	-1.35665	Glioma tumorigenesis	79
31455353	2019	Cell communication and signaling : CCS	D'Alessandro, Giuseppina;Quaglio, Deborah;Monaco, Lucia;Lauro, Clotilde;Ghirga, Francesca;Ingallina, Cinzia;De Martino, Michela;Fucile, Sergio;Porzia, Alessandra;Di Castro, Maria Amalia;Bellato, Federica;Mastrotto, Francesca;Mori, Mattia;Infante, Paola;Turano, Paola;Salmaso, Stefano;Caliceti, Paolo;Di Marcotullio, Lucia;Botta, Bruno;Ghini, Veronica;Limatola, Cristina	&lt;sup&gt;1&lt;/sup&gt;H-NMR metabolomics reveals the Glabrescione B exacerbation of glycolytic metabolism beside the cell growth inhibitory effect in glioma.	Glioma is the most common and primary brain tumors in adults. Despite the available multimodal therapies, glioma patients appear to have a poor prognosis. The Hedgehog (Hh) signaling is involved in tumorigenesis and emerged as a promising target for brain tumors. Glabrescione B (GlaB) has been recently identified as the first direct inhibitor of Gli1, the downstream effector of the pathway.</Abst…	Journal Article	eng	PMC6712882	10.1186/s12964-019-0421-8		-1.28378	10.3076	-2.94306	Glioma tumorigenesis	79
31345225	2019	Cell communication and signaling : CCS	Yang, Yanfang;Liang, Ziwei;Xia, Zijing;Wang, Xixi;Ma, Yanni;Sheng, Zenghua;Gu, Qingjia;Shen, Guobo;Zhou, Liangxue;Zhu, Hongxia;Xu, Ningzhi;Liang, Shufang	SAE1 promotes human glioma progression through activating AKT SUMOylation-mediated signaling pathways.	The SUMO-activating enzyme SAE1 is indispensable for protein SUMOylation. A dysregulation of SAE1 expression involves in progression of several human cancers. However, its biological roles of SAE1 in glioma are unclear by now.</AbstractText>: The SUMO-activating enzyme SAE1 is indispensable for protein SUMOylation. A dysregulation of SAE1 expression involves in progression of several human cancer…	Journal Article	eng	PMC6659289	10.1186/s12964-019-0392-9		-0.409131	9.93467	-0.885502	Glioma tumorigenesis	79
31331834	2019	EBioMedicine	Buser, Dominik P;Ritz, Marie-Françoise;Moes, Suzette;Tostado, Cristobal;Frank, Stephan;Spiess, Martin;Mariani, Luigi;Jenö, Paul;Boulay, Jean-Louis;Hutter, Gregor	Quantitative proteomics reveals reduction of endocytic machinery components in gliomas.	BACKGROUND: Gliomas are the most frequent and aggressive malignancies of the central nervous system. Decades of molecular analyses have demonstrated that gliomas accumulate genetic alterations that culminate in enhanced activity of receptor tyrosine kinases and downstream mediators. While the genetic alterations, like gene amplification or loss, have been well characterized, little information ex…	Journal Article	eng	PMC6711119	10.1016/j.ebiom.2019.07.039	Biopsy;Computational Biology;Endocytosis;Glioma;Humans;Mass Spectrometry;Neoplasm Grading;Neoplasm Staging;Neoplastic Cells, Circulating;Proteome;Proteomics	-0.221403	8.4342	0.763944	Glioma tumorigenesis	79
31275862	2019	Frontiers in oncology	Biau, Julian;Chautard, Emmanuel;Berthault, Nathalie;de Koning, Leanne;Court, Frank;Pereira, Bruno;Verrelle, Pierre;Dutreix, Marie	Combining the DNA Repair Inhibitor Dbait With Radiotherapy for the Treatment of High Grade Glioma: Efficacy and Protein Biomarkers of Resistance in Preclinical Models.	High grade glioma relapses occur often within the irradiated volume mostly due to a high resistance to radiation therapy (RT). Dbait (which stands for DNA strand break bait) molecules mimic DSBs and trap DNA repair proteins, thereby inhibiting repair of DNA damage induced by RT. Here we evaluate the potential of Dbait to sensitize high grade glioma to RT. First, we demonstrated the radiosensitize…	Journal Article	eng	PMC6593092	10.3389/fonc.2019.00549		-2.85862	8.0109	-2.88204	Glioma tumorigenesis	79
31104065	2019	Medical science monitor : international medical journal of experimental and clinical research	Deng, Teng;Gong, Yi-Zhen;Wang, Xiang-Kun;Liao, Xi-Wen;Huang, Ke-Tuan;Zhu, Guang-Zhi;Chen, Hai-Nan;Guo, Fang-Zhou;Mo, Li-Gen;Li, Le-Qun	Use of Genome-Scale Integrated Analysis to Identify Key Genes and Potential Molecular Mechanisms in Recurrence of Lower-Grade Brain Glioma.	BACKGROUND The aim of this study was to identify gene signals for lower-grade glioma (LGG) and to assess their potential as recurrence biomarkers. MATERIAL AND METHODS An LGG-related mRNA sequencing dataset was downloaded from The Cancer Genome Atlas (TCGA) Informix. Multiple bioinformatics analysis methods were used to identify key genes and potential molecular mechanisms in recurrence of LGG. R…	Journal Article	eng	PMC6537664	10.12659/MSM.913602	Biomarkers;Brain Neoplasms;Computational Biology;Databases, Genetic;Gene Expression Profiling;Gene Ontology;Gene Regulatory Networks;Glioma;Humans;Neoplasm Grading;Protein Interaction Mapping;Protein Interaction Maps;Transcriptome	3.69102	8.11884	5.56181	Glioma tumorigenesis	79
31092287	2019	Acta neuropathologica communications	Qi, J;Esfahani, D R;Huang, T;Ozark, P;Bartom, E;Hashizume, R;Bonner, E R;An, S;Horbinski, C M;James, C D;Saratsis, A M	Tenascin-C expression contributes to pediatric brainstem glioma tumor phenotype and represents a novel biomarker of disease.	Diffuse intrinsic pontine glioma (DIPG), an infiltrative, high grade glioma (HGG) affecting young children, has the highest mortality rate of all pediatric cancers. Despite treatment, average survival is less than twelve months, and five-year survival under 5%. We previously detected increased expression of Tenascin-C (TNC) protein in DIPG cerebrospinal fluid and tumor tissue relative to normal s…	Journal Article	eng	PMC6518697	10.1186/s40478-019-0727-1		0.643378	7.33231	-1.03558	Glioma tumorigenesis	79
30923116	2019	Proceedings of the National Academy of Sciences of the United States of America	Phillips, Richard E;Yang, Yanhong;Smith, Ryan C;Thompson, Bonne M;Yamasaki, Tomoko;Soto-Feliciano, Yadira M;Funato, Kosuke;Liang, Yupu;Garcia-Bermudez, Javier;Wang, Xiaoshi;Garcia, Benjamin A;Yamasaki, Kazuhiko;McDonald, Jeffrey G;Birsoy, Kivanç;Tabar, Viviane;Allis, C David	Target identification reveals lanosterol synthase as a vulnerability in glioma.	Diffuse intrinsic pontine glioma (DIPG) remains an incurable childhood brain tumor for which novel therapeutic approaches are desperately needed. Previous studies have shown that the menin inhibitor MI-2 exhibits promising activity in preclinical DIPG and adult glioma models, although the mechanism underlying this activity is unknown. Here, using an integrated approach, we show that MI-2 exerts i…	Journal Article	eng	PMC6475387	10.1073/pnas.1820989116		-1.18454	10.2828	-2.71613	Glioma tumorigenesis	79
30881126	2019	Cancer management and research	Liu, Yu-Xiao;Zhou, Jun-Nian;Liu, Ke-Hui;Fu, Xiang-Pin;Zhang, Zhi-Wen;Zhang, Qin-Hong;Yue, Wen	CIRP regulates BEV-induced cell migration in gliomas.	A better understanding of the underlying molecular mechanisms in treatment failure of bevacizumab (BEV) for malignant glioma would contribute to overcome therapeutic resistance.</AbstractText>: A better understanding of the underlying molecular mechanisms in treatment failure of bevacizumab (BEV) for malignant glioma would contribute to overcome therapeutic resistance.Here, we used a quantitative…	Journal Article	eng	PMC6417006	10.2147/CMAR.S191249		1.09472	8.76522	-1.81827	Glioma tumorigenesis	79
30877245	2019	Proceedings of the National Academy of Sciences of the United States of America	Zhang, Yunqiu;Li, Jiuyi;Yi, Kaikai;Feng, Jing;Cong, Zhengmin;Wang, Zheng;Wei, Yanfei;Wu, Fan;Cheng, Wen;Samo, Ayaz Ali;Salomoni, Paolo;Yang, Qiong;Huang, Yu;Kang, Chunsheng;Jiang, Tao;Fan, Xiaolong	Elevated signature of a gene module coexpressed with CDC20 marks genomic instability in glioma.	Genomic instability (GI) drives tumor heterogeneity and promotes tumor progression and therapy resistance. However, causative factors underlying GI and means for clinical detection of GI in glioma are inadequately identified. We describe here that elevated expression of a gene module coexpressed with CDC20 (CDC20-M), the activator of the anaphase-promoting complex in the cell cycle, marks GI in g…	Journal Article	eng	PMC6452696	10.1073/pnas.1814060116	Animals;Biomarkers, Tumor;Cdc20 Proteins;Chemotherapy, Adjuvant;Female;Gene Expression Profiling;Gene Expression Regulation, Neoplastic;Genomic Instability;Glioma;Humans;Male;Mice;Mice, Nude;Neoplasm Proteins;Temozolomide;Xenograft Model Antitumor Assays	2.58377	11.7702	4.37444	Glioma tumorigenesis	79
30705664	2019	Frontiers in neurology	Edwards, Lincoln A;Kim, Sungjin;Madany, Mecca;Nuno, Miriam;Thomas, Tom;Li, Aiguo;Berel, Dror;Lee, Bong-Sup;Liu, Minzhi;Black, Keith L;Fan, Xuemo;Zhang, Wei;Yu, John S	ZEB1 Is a Transcription Factor That Is Prognostic and Predictive in Diffuse Gliomas.	Objective: To address the unmet medical need to better prognosticate patients with diffuse gliomas and to predict responses to chemotherapy regimens. Methods: ZEB1 alterations were retrospectively identified from a cohort of 1,160 diffuse glioma patients. Epigenome-wide association scans (EWAS) were performed on available data. We determined the utility of ZEB1 as a prognostic indicator of patien…	Journal Article	eng	PMC6345215	10.3389/fneur.2018.01199		0.770621	11.5781	6.32591	Glioma tumorigenesis	79
30405856	2018	Disease markers	Geng, Rong-Xin;Li, Ning;Xu, Yang;Liu, Jun-Hui;Yuan, Fan-En;Sun, Qian;Liu, Bao-Hui;Chen, Qian-Xue	Identification of Core Biomarkers Associated with Outcome in Glioma: Evidence from Bioinformatics Analysis.	Glioma is the most common neoplasm of the central nervous system (CNS); the progression and outcomes of which are affected by a complicated network of genes and pathways. We chose a gene expression profile of GSE66354 from GEO database to search core biomarkers during the occurrence and development of glioma. A total of 149 samples, involving 136 glioma and 13 normal brain tissues, were enrolled …	Journal Article	eng	PMC6199874	10.1155/2018/3215958	Biomarkers, Tumor;Brain;Brain Neoplasms;Gene Expression Profiling;Gene Expression Regulation, Neoplastic;Glioma;Humans;Transcriptome	2.78035	8.14523	3.6661	Glioma tumorigenesis	79
30333031	2018	Journal of experimental &amp; clinical cancer research : CR	Guan, Xiudong;Luo, Lanxin;Begum, Gulnaz;Kohanbash, Gary;Song, Qingkun;Rao, Aparna;Amankulor, Nduka;Sun, Baoshan;Sun, Dandan;Jia, Wang	Elevated Na/H exchanger 1 (SLC9A1) emerges as a marker for tumorigenesis and prognosis in gliomas.	METHODS: The Chinese Glioma Genome Atlas (CGGA) dataset containing transcriptome sequencing data of 325 glioma samples and the Cancer Genome Atlas (TCGA) with 698 glioma mRNAseq data were analyzed in this study. Mouse SB28 and GL26 intracranial syngeneic glioma models in C57BL/6 J mice were established to investigate NHE1 expression and impact of NHE1 protein inhibition with its inhibitor HOE642 …	Journal Article	eng	PMC6192309	10.1186/s13046-018-0923-z	Animals;Brain Neoplasms;Cell Line, Tumor;Cell Proliferation;Cell Survival;Female;Gene Expression Profiling;Gene Expression Regulation, Neoplastic;Glioma;Guanidines;Humans;Male;Mice;Mice, Inbred C57BL;Neoplasm Grading;Neoplasm Transplantation;Prognosis;Sequence Analysis, RNA;Sodium-Hydrogen Exchanger 1;Sulfones;Survival Analysis;Up-Regulation	1.28234	10.5472	1.27211	Glioma tumorigenesis	79
30053564	2018	World neurosurgery	Zhong, Sheng;Fan, Yuxiang;Wu, Bo;Wang, Yannan;Jiang, Shanshan;Ge, Junliang;Hua, Cong;Zhao, Gang;Chen, Yong;Xu, Haiyang	HDAC3 Expression Correlates with the Prognosis and Grade of Patients with Glioma: A Diversification Analysis Based on Transcriptome and Clinical Evidence.	OBJECTIVE: This study aimed to clarify the relationship between histone deacetylase 3 (HDAC3) expression and the prognosis as well as the grade of patients with glioma.METHODS: The quantitative real-time polymerase chain reaction was profiled to examine the HDAC3 expression in glioma and normal glial cell lines. An Oncomine database analysis and prognosis analysis were performed. The correlation …	Journal Article	eng		10.1016/j.wneu.2018.07.076	Adult;Aged;Brain Neoplasms;Female;Gene Expression Regulation, Neoplastic;Glioma;Histone Deacetylases;Humans;Male;Meta-Analysis as Topic;Middle Aged;Prognosis;RNA, Messenger;Survival Analysis;Transcriptome	0.0138296	9.61013	6.20665	Glioma tumorigenesis	79
30009411	2018	The Journal of pathology	Guichet, Pierre-Olivier;Masliantsev, Konstantin;Tachon, Gaëlle;Petropoulos, Christos;Godet, Julie;Larrieu, Delphine;Milin, Serge;Wager, Michel;Karayan-Tapon, Lucie	Fatal correlation between YAP1 expression and glioma aggressiveness: clinical and molecular evidence.	During the last decade, large-scale genomic analyses have clarified the somatic alterations in gliomas, providing new molecular classification based on IDH1/2 mutations and 1p19q codeletion with more accurate patient prognostication. The Hippo pathway downstream effectors, YAP1 and TAZ, have recently emerged as major determinants of malignancy by inducing proliferation, chemoresistance, and metas…	Journal Article	eng		10.1002/path.5133	Adaptor Proteins, Signal Transducing;Adult;Aged;Aged, 80 and over;Animals;Biomarkers, Tumor;Brain Neoplasms;Cell Proliferation;Female;Gene Expression Regulation, Neoplastic;Glioma;Humans;Male;Mice;Middle Aged;Neoplastic Stem Cells;Oligodendrocyte Transcription Factor 2;Phenotype;Phosphoproteins;Progression-Free Survival;Signal Transduction;Time Factors;Transcription Factors;Tumor Cells, Cultured;…	3.13542	11.7461	4.77574	Glioma tumorigenesis	79
29667783	2018	Journal of cellular and molecular medicine	Xie, Manyi;Ji, Zhe;Bao, Yaxing;Zhu, Yufu;Xu, Yang;Wang, Lei;Gao, Shangfeng;Liu, Zhiyi;Tian, Zilu;Meng, Qingming;Shi, Hengliang;Yu, Rutong	PHAP1 promotes glioma cell proliferation by regulating the Akt/p27/stathmin pathway.	PHAP1 (Putative HLA-DR-associated protein 1), also termed acidic leucine-rich nuclear phosphoprotein 32A (ANP32A), Phosphoprotein 32 (pp32) or protein phosphatase 2A inhibitor (I1PP2A), is a multifunctional protein aberrantly expressed in multiple types of human cancers. However, its expression pattern and clinical relevance in human glioma remain unknown. In this study, Western blotting and immu…	Journal Article	eng	PMC6033192	10.1111/jcmm.13639	Blotting, Western;Brain Neoplasms;Cell Line, Tumor;Cell Proliferation;Cyclin-Dependent Kinase Inhibitor p27;Gene Expression Regulation, Neoplastic;Glioma;Humans;Immunohistochemistry;Prognosis;Proteomics;Proto-Oncogene Proteins c-akt;RNA-Binding Proteins;Stathmin	-0.252478	9.82332	-1.12221	Glioma tumorigenesis	79
29453678	2018	Journal of neuro-oncology	Hersh, David S;Peng, Sen;Dancy, Jimena G;Galisteo, Rebeca;Eschbacher, Jennifer M;Castellani, Rudy J;Heath, Jonathan E;Legesse, Teklu;Kim, Anthony J;Woodworth, Graeme F;Tran, Nhan L;Winkles, Jeffrey A	Differential expression of the TWEAK receptor Fn14 in IDH1 wild-type and mutant gliomas.	The TNF receptor superfamily member Fn14 is overexpressed by many solid tumor types, including glioblastoma (GBM), the most common and lethal form of adult brain cancer. GBM is notable for a highly infiltrative growth pattern and several groups have reported that high Fn14 expression levels can increase tumor cell invasiveness. We reported previously that the mesenchymal and proneural GBM transcr…	Journal Article	eng	PMC6047063	10.1007/s11060-018-2799-3	Biomarkers, Tumor;Brain;Brain Neoplasms;Cell Line, Tumor;Cytokine TWEAK;DNA Methylation;Gene Expression Regulation, Neoplastic;Glioma;Humans;Isocitrate Dehydrogenase;Mutation;Neoplasm Grading;RNA, Messenger;Retrospective Studies;TWEAK Receptor	2.93536	10.7253	0.375085	Glioma tumorigenesis	79
29348654	2018	Scientific reports	Wen, Yulin;Zhang, Yong;Li, Jinbang;Luo, Feng;Huang, Zhongxi;Liu, Kunping	Low concentration trifluoperazine promotes proliferation and reduces calcium-dependent apoptosis in glioma cells.	Glioma patients constitute the greatest percentage of depressed neoplasm patients. These patients often require antidepressant treatment, but the effect of antidepressant drugs on glioma cells requires further evaluation. In the present study, we evaluated the effect of trifluoperazine (TFP) on the proliferation and apoptosis of glioma cells. Transcriptomic and bioinformatics analysis results sug…	Journal Article	eng	PMC5773581	10.1038/s41598-018-19413-y	Animals;Antidepressive Agents;Apoptosis;Biomarkers, Tumor;Brain Neoplasms;Calcium;Cell Cycle;Cell Line, Tumor;Cell Proliferation;Cell Survival;Depression;Glioma;Heterografts;Humans;Ki-67 Antigen;Male;Mice;Mice, Nude;Neuroglia;Proliferating Cell Nuclear Antigen;Trifluoperazine;Tumor Burden	-2.21335	10.3888	-0.940067	Glioma tumorigenesis	79
28924174	2017	Scientific reports	Wang, Siqi;Jin, Feng;Fan, Wenliang;Liu, Fang;Zou, Yan;Hu, Xuehan;Xu, Haibo;Han, Ping	Gene expression meta-analysis in diffuse low-grade glioma and the corresponding histological subtypes.	Diffuse low-grade glioma (DLGG) is a well-differentiated, slow-growing tumour with an inherent tendency to progress to high-grade glioma. The potential roles of genetic alterations in DLGG development have not yet been fully delineated. Therefore, the current study performed an integrated gene expression meta-analysis of eight independent, publicly available microarray datasets including 291 DLGG…	Meta-Analysis	eng	PMC5603565	10.1038/s41598-017-12087-y	Brain Neoplasms;Female;Gene Expression Regulation, Neoplastic;Gene Regulatory Networks;Glioma;Humans;Male;Neoplasm Proteins;Transcriptome	1.18947	9.15914	5.09199	Glioma tumorigenesis	79
28912488	2017	Scientific reports	Hu, Huimin;Wang, Zheng;Li, Mingyang;Zeng, Fan;Wang, Kuanyu;Huang, Ruoyu;Wang, Haoyuan;Yang, Fan;Liang, Tingyu;Huang, Hua;Jiang, Tao	Gene Expression and Methylation Analyses Suggest DCTD as a Prognostic Factor in Malignant Glioma.	Malignant glioma is the most common brain cancer with dismal outcomes. Individual variation of the patients' survival times is remarkable. Here, we investigated the transcriptome and promoter methylation differences between patients of malignant glioma with short (less than one year) and the patients with long (more than three years) survival in CGGA (Chinese Glioma Genome Atlas), and validated t…	Journal Article	eng	PMC5599690	10.1038/s41598-017-11962-y	Adolescent;Adult;Aged;Computational Biology;DCMP Deaminase;DNA Methylation;Epigenesis, Genetic;Female;Gene Expression Profiling;Gene Expression Regulation, Neoplastic;Gene Ontology;Genomics;Glioma;Humans;Kaplan-Meier Estimate;Male;Middle Aged;Mutation;Neoplasm Grading;Prognosis;RNA, Messenger;Transcriptome;Young Adult	1.0089	11.4192	5.11418	Glioma tumorigenesis	79
28742165	2017	Molecular bioSystems	Donakonda, Sainitin;Sinha, Swati;Dighe, Shrinivas Nivrutti;Rao, Manchanahalli R Satyanarayana	System analysis identifies distinct and common functional networks governed by transcription factor ASCL1, in glioma and small cell lung cancer.	ASCL1 is a basic Helix-Loop-Helix transcription factor (TF), which is involved in various cellular processes like neuronal development and signaling pathways. Transcriptome profiling has shown that ASCL1 overexpression plays an important role in the development of glioma and Small Cell Lung Carcinoma (SCLC), but distinct and common molecular mechanisms regulated by ASCL1 in these cancers are unkn…	Journal Article	eng		10.1039/c6mb00851h	Basic Helix-Loop-Helix Transcription Factors;Brain Neoplasms;Cell Line, Tumor;Cell Proliferation;Gene Expression Regulation, Neoplastic;Gene Regulatory Networks;Genome-Wide Association Study;Glioma;Humans;Lung Neoplasms;Mitosis;Neoplasm Proteins;Organ Specificity;Protein Interaction Mapping;RNA, Small Interfering;Signal Transduction;Small Cell Lung Carcinoma;Systems Biology;Transcriptome	2.57858	8.54787	3.35215	Glioma tumorigenesis	79
28693172	2017	Oncology letters	Hong, Ji-Dong;Wang, Xia;Peng, Yu-Ping;Peng, Jiang-Hua;Wang, Jun;Dong, Ye-Ping;He, Dan;Peng, Zhen-Zi;Tu, Qing-Song;Sheng, Liang-Fang;Zhong, Mei-Zuo;Duan, Chao-Jun	Silencing platelet-derived growth factor receptor-β enhances the radiosensitivity of C6 glioma cells in vitro and in vivo.	Platelet-derived growth factor receptor (PDGFR)-beta is an important tyrosine kinase and its downregulation has been reported to alter the radiosensitivity of glioma cells, although the underlying mechanism is unclear. In order to investigate the effect of PDGFR-beta on the radiosensitivity of glioblastoma, the present study transfected C6 glioma cells with a PDGFR-beta-specific small interfering…	Journal Article	eng	PMC5494875	10.3892/ol.2017.6143		0.0113824	10.5729	-1.10057	Glioma tumorigenesis	79
28670517	2017	Cell journal	Taghipour, Mousa;Omidvar, Aydine;Razmkhah, Mahboobeh;Ghaderi, Abbas;Mojtahedi, Zahra	Comparative Proteomic Analysis of Tumor Mesenchymal-Like Stem Cells Derived from High Grade versus Low Grade Gliomas.	OBJECTIVE: Gliomas are the most common primary brain tumors, and have been ranked as the fourth leading cause of cancer death. Tumor mesenchymal-like stem cells (tMSCs) contribute to the aggressive behavior of glial tumors by providing a favorable microenvironment for the malignant cells. The aim of our study was to identify differential proteome of tMSCs derived from low vs. high grade glioma tu…	Journal Article	eng	PMC5412783	10.22074/cellj.2016.4179		-1.31461	8.45728	4.54874	Glioma tumorigenesis	79
28607172	2017	The Journal of neuroscience : the official journal of the Society for Neuroscience	Jung, Erik;Osswald, Matthias;Blaes, Jonas;Wiestler, Benedikt;Sahm, Felix;Schmenger, Torsten;Solecki, Gergely;Deumelandt, Katrin;Kurz, Felix T;Xie, Ruifan;Weil, Sophie;Heil, Oliver;Thomé, Carina;Gömmel, Miriam;Syed, Mustafa;Häring, Peter;Huber, Peter E;Heiland, Sabine;Platten, Michael;von Deimling, Andreas;Wick, Wolfgang;Winkler, Frank	Tweety-Homolog 1 Drives Brain Colonization of Gliomas.	Early and progressive colonization of the healthy brain is one hallmark of diffuse gliomas, including glioblastomas. We recently discovered ultralong (>10 to hundreds of microns) membrane protrusions [tumor microtubes (TMs)] extended by glioma cells. TMs have been associated with the capacity of glioma cells to effectively invade the brain and proliferate. Moreover, TMs are also used by some tumo…	Journal Article	eng	PMC6705725	10.1523/JNEUROSCI.3532-16.2017	Animals;Brain Neoplasms;Cell Line, Tumor;Cell Proliferation;Glioblastoma;Humans;Male;Membrane Proteins;Mice;Mice, Nude;Neoplasm Invasiveness	0.107856	8.43521	0.776861	Glioma tumorigenesis	79
28481733	2017	Omics : a journal of integrative biology	Gollapalli, Kishore;Ghantasala, Saicharan;Atak, Apurva;Rapole, Srikanth;Moiyadi, Aliasgar;Epari, Sridhar;Srivastava, Sanjeeva	Tissue Proteome Analysis of Different Grades of Human Gliomas Provides Major Cues for Glioma Pathogenesis.	Gliomas are heterogeneous and most commonly occurring brain tumors. Blood-brain barrier restricts the entry of brain tumor proteins into blood stream thus limiting the usage of serum or plasma for proteomic analysis. Our study aimed at understanding the molecular basis of aggressiveness of various grades of brain tumors using isobaric tagging for relative and absolute quantification (iTRAQ) based…	Journal Article	eng		10.1089/omi.2017.0028	Biomarkers, Tumor;Biopsy;Brain Neoplasms;Cell Line, Tumor;Chromatography, Liquid;Gene Expression Profiling;Glioblastoma;Glioma;Humans;Mass Spectrometry;Neoplasm Proteins;Neoplasm Staging;Proteome;Proteomics	-0.745517	8.90283	5.36658	Glioma tumorigenesis	79
28440425	2017	Molecular medicine reports	Lee, Hyunji;Park, Jisoo;Tran, Quangdon;Kim, Dohoon;Hong, Youngeun;Cho, Hyeonjeong;Kwon, So Hee;Brazil, Derek;Kim, Seon-Hwan;Park, Jongsun	Mitochondrial transcription factor A (TFAM) is upregulated in glioma.	Mitochondrial transcription factor A (TFAM), which was initially discovered as a transcription factor for mitochondrial DNA, has known to be critical for the regulation of mitochondrial DNA. However the possible involvement of TFAM in cancer is largely unknown. In this study, we have provided some evidence that TFAM may have a potential role in brain tumor. Western blot analysis with anti‑TFAM an…	Journal Article	eng		10.3892/mmr.2017.6467	Cell Line, Tumor;DNA-Binding Proteins;Gene Expression Regulation, Neoplastic;Glioma;Humans;Mitochondrial Proteins;Prognosis;Protein Transport;RNA, Messenger;Transcription Factors;Up-Regulation	-0.9412	6.43998	1.21891	Glioma tumorigenesis	79
28199986	2017	Oncotarget	Tong, Yaohui;Hao, Junjun;Tu, Qiu;Yu, Hualin;Yan, Lanzhen;Li, Yuan;Lv, Longbao;Wang, Fei;Iavarone, Antonio;Zhao, Xudong	A tree shrew glioblastoma model recapitulates features of human glioblastoma.	Tupaia belangeri (tree shrew), an animal species whose genome has significantly higher similarity to primates than rodents, has been used in biomedical research. To generate animal models that reproduce the human tumors more faithfully than rodents, we present the first report of a cancer model mimicking human tumor genetics in tree shrew. By engineering a lentiviral system for the transduction o…	Journal Article	eng	PMC5392295	10.18632/oncotarget.15225	Amino Acid Sequence;Animals;Disease Models, Animal;Gene Expression Profiling;Glioblastoma;Humans;Lentivirus;Male;RNA Interference;RNA, Small Interfering;Transcriptome;Tumor Suppressor Protein p53;Tupaiidae	0.572898	10.4373	1.59679	Glioma tumorigenesis	79
28133515	2017	Toxicological research	Park, Jisoo;Lee, Hyunji;Tran, Quangdon;Mun, Kisun;Kim, Dohoon;Hong, Youngeun;Kwon, So Hee;Brazil, Derek;Park, Jongsun;Kim, Seon-Hwan	Recognition of Transmembrane Protein 39A as a Tumor-Specific Marker in Brain Tumor.	Transmembrane protein 39A (TMEM39A) belongs to the TMEM39 family. TMEM39A gene is a susceptibility locus for multiple sclerosis. In addition, TMEM39A seems to be implicated in systemic lupus erythematosus. However, any possible involvement of TMEM39A in cancer remains largely unknown. In the present report, we provide evidence that TMEM39A may play a role in brain tumors. Western blotting using a…	Journal Article	eng	PMC5266369	10.5487/TR.2017.33.1.063		-0.912904	6.85617	1.64557	Glioma tumorigenesis	79
28075478	2017	Oncology reports	Han, Ming-Zhi;Huang, Bin;Chen, An-Jing;Zhang, Xin;Xu, Ran;Wang, Jian;Li, Xin-Gang	High expression of RAB43 predicts poor prognosis and is associated with epithelial-mesenchymal transition in gliomas.	The Ras-related GTP-binding protein (RAB) family plays an important role in regulating signal transduction and cellular processes including vesicle transport, cytoskeleton formation and membrane trafficking. More recently, several RAB members have been reported to promote tumorigenesis in many types of cancers. However, the clinical significance and potential function of RAB43 in gliomas remain u…	Journal Article	eng		10.3892/or.2017.5349	Biomarkers, Tumor;Blotting, Western;Brain Neoplasms;Cell Adhesion;Cell Movement;Disease Progression;Epithelial-Mesenchymal Transition;Female;Follow-Up Studies;Gene Expression Profiling;Gene Expression Regulation, Neoplastic;Glioma;Humans;Immunoenzyme Techniques;Male;Middle Aged;Neoplasm Grading;Prognosis;Survival Rate;Tumor Cells, Cultured;rab GTP-Binding Proteins	1.75053	9.72641	1.68877	Glioma tumorigenesis	79
28004117	2016	Oncology reports	Ponnampalam, Stephen N;Kamaluddin, Nor Rizan;Zakaria, Zubaidah;Matheneswaran, Vickneswaran;Ganesan, Dharmendra;Haspani, Mohammed Saffari;Ryten, Mina;Hardy, John A	A blood-based gene expression and signaling pathway analysis to differentiate between high and low grade gliomas.	The aims of the present study were to undertake gene expression profiling of the blood of glioma patients to determine key genetic components of signaling pathways and to develop a panel of genes that could be used as a potential blood-based biomarker to differentiate between high and low grade gliomas, non-gliomas and control samples. In this study, blood samples were obtained from glioma patien…	Journal Article	eng	PMC5355666	10.3892/or.2016.5285	Adult;Aged;Brain Neoplasms;Female;Gene Expression Profiling;Gene Expression Regulation, Neoplastic;Glioma;Humans;Male;Middle Aged;Oligonucleotide Array Sequence Analysis;Polymerase Chain Reaction;Principal Component Analysis;Reproducibility of Results;Signal Transduction;Transcriptome	0.930006	8.92328	5.04049	Glioma tumorigenesis	79
27835581	2016	Oncotarget	Cui, Yi;Li, Jian;Weng, Ling;Wirbisky, Sara E;Freeman, Jennifer L;Liu, Jingping;Liu, Qing;Yuan, Xianrui;Irudayaraj, Joseph	Regulatory landscape and clinical implication of MBD3 in human malignant glioma.	In this article we inspect the roles and functions of the methyl-CpG-binding domain protein 3 (MBD3) in human malignant glioma, to assess its potential as an epigenetic biomarker for prognosis. The regulatory effects of MBD3 on glioma transcriptome were first profiled by high-throughput microarray. Our results indicate that MBD3 is involved in both transcriptional activation and repression. Furth…	Journal Article	eng	PMC5340251	10.18632/oncotarget.13173	5-Methylcytosine;Brain Neoplasms;Cell Line, Tumor;DNA-Binding Proteins;Disease-Free Survival;Gene Expression Profiling;Gene Expression Regulation, Neoplastic;Glioma;HLA-D Antigens;High-Throughput Nucleotide Sequencing;Humans;MicroRNAs;Oligonucleotide Array Sequence Analysis;Pilot Projects;RNA Interference;RNA, Long Noncoding;RNA, Untranslated;Signal Transduction;Time Factors;Transcription, Geneti…	-0.747176	10.2644	1.57954	Glioma tumorigenesis	79
27829236	2016	Oncotarget	Wang, Zheng;Zhang, Chuanbao;Sun, Lihua;Liang, Jingshan;Liu, Xing;Li, Guanzhang;Yao, Kun;Zhang, Wei;Jiang, Tao	FGFR3, as a receptor tyrosine kinase, is associated with differentiated biological functions and improved survival of glioma patients.	BACKGROUND: Activation of receptor tyrosine kinases is common in Malignancies. FGFR3 fusion with TACC3 has been reported to have transforming effects in primary glioblastoma and display oncogenic activity in vitro and in vivo. We set out to investigate the role of FGFR3 in glioma through transcriptomic analysis.RESULTS: FGFR3 increased in Classical subtype and Neural subtype consistently in CGGA …	Journal Article	eng	PMC5356683	10.18632/oncotarget.13139	Biomarkers, Tumor;Cohort Studies;Gene Expression Regulation, Neoplastic;Gene Ontology;Glioma;Humans;Microtubule-Associated Proteins;Oncogene Proteins, Fusion;Prognosis;Receptor, Fibroblast Growth Factor, Type 3;Sequence Analysis, RNA;Survival Analysis;Transcriptome;Up-Regulation	3.45876	12.3082	5.27298	Glioma tumorigenesis	79
27385209	2016	Oncotarget	Zhang, Wanyu;Lv, Yuhong;Xue, Yang;Wu, Chenxing;Yao, Kun;Zhang, Chuanbao;Jin, Qiang;Huang, Rong;Li, Jiuyi;Sun, Yingyu;Su, Xiaodong;Jiang, Tao;Fan, Xiaolong	Co-expression modules of NF1, PTEN and sprouty enable distinction of adult diffuse gliomas according to pathway activities of receptor tyrosine kinases.	Inter-individual variability causing elevated signaling of receptor tyrosine kinases (RTK) may have hampered the efficacy of targeted therapies. We developed a molecular signature for clustering adult diffuse gliomas based on the extent of RTK pathway activities. Glioma gene modules co-expressed with NF1 (NF1-M), Sprouty (SPRY-M) and PTEN (PTEN-M) were identified, their signatures enabled robust …	Journal Article	eng	PMC5312298	10.18632/oncotarget.10359	Adult;Cluster Analysis;Gene Expression Regulation, Neoplastic;Glioma;Humans;Intracellular Signaling Peptides and Proteins;Membrane Proteins;Neoplasm Staging;Nerve Tissue Proteins;Neurofibromin 1;PTEN Phosphohydrolase;Phosphatidylinositol 3-Kinases;Phosphoproteins;Receptor Cross-Talk;Receptor Protein-Tyrosine Kinases;Signal Transduction;Transcriptome;Tumor Microenvironment	1.88211	12.1238	3.63986	Glioma tumorigenesis	79
27323851	2016	Oncotarget	Zhu, Ping;Zhang, Chuan-Bao;Yang, Pei;Chen, Jing;Liu, Yu-Qing;Hu, Hui-Min;Huang, Hua;Bao, Zhao-Shi;Zhang, Wei;Kong, Wei-Jia;Jiang, Tao	Phosphohistone H3 (pHH3) is a prognostic and epithelial to mesenchymal transition marker in diffuse gliomas.	The World Health Organization (WHO) grading of gliomas stratifies tumors by histology. However, the aggressiveness of tumors in each grade still shows great heterogeneity. Phosphohistone H3 (pHH3) has been reported as an accurate marker of cells within the mitotic phase of the cell cycle in many kinds of cancers. To evaluate the role of pHH3 in predicting patient outcome and to annotate the funct…	Journal Article	eng	PMC5216701	10.18632/oncotarget.7154	Adult;Aged;Biomarkers, Tumor;Brain Neoplasms;Epithelial-Mesenchymal Transition;Female;Gene Expression Profiling;Glioma;Histones;Humans;Kaplan-Meier Estimate;Male;Middle Aged;Phosphorylation;Prognosis;Proportional Hazards Models;Transcriptome	2.74388	11.0706	5.65351	Glioma tumorigenesis	79
27074575	2016	Oncotarget	Gressot, Loyola V;Doucette, Tiffany;Yang, Yuhui;Fuller, Gregory N;Manyam, Ganiraju;Rao, Arvind;Latha, Khatri;Rao, Ganesh	Analysis of the inhibitors of apoptosis identifies BIRC3 as a facilitator of malignant progression in glioma.	Gliomas, the most common primary brain tumor in humans, include a spectrum of disease. High-grade gliomas (HGG), such as glioblastoma, may arise from low-grade gliomas (LGG) that have a more indolent course. The process of malignant transformation (MT) of LGG to HGG is poorly understood but likely involves the activation of signaling programs that suppress apoptosis. We previously showed that Sur…	Journal Article	eng	PMC5355046	10.18632/oncotarget.8657	Animals;Apoptosis;Baculoviral IAP Repeat-Containing 3 Protein;Brain Neoplasms;Cell Transformation, Neoplastic;Disease Progression;Disease-Free Survival;Glioma;Humans;Inhibitor of Apoptosis Proteins;Kaplan-Meier Estimate;Mice;Mice, Transgenic;Transcriptome;Ubiquitin-Protein Ligases	1.59981	9.51447	7.21949	Glioma tumorigenesis	79
27002148	2016	The Journal of biological chemistry	Sakakini, Nathalie;Turchi, Laurent;Bergon, Aurélie;Holota, Hélène;Rekima, Samah;Lopez, Fabrice;Paquis, Philipe;Almairac, Fabien;Fontaine, Denys;Baeza-Kallee, Nathalie;Van Obberghen-Schilling, Ellen;Junier, Marie-Pierre;Chneiweiss, Hervé;Figarella-Branger, Dominique;Burel-Vandenbos, Fanny;Imbert, Jean;Virolle, Thierry	A Positive Feed-forward Loop Associating EGR1 and PDGFA Promotes Proliferation and Self-renewal in Glioblastoma Stem Cells.	Glioblastomas are the most common primary brain tumors, highly vascularized, infiltrating, and resistant to current therapies. This cancer leads to a fatal outcome in less than 18 months. The aggressive behavior of glioblastomas, including resistance to current treatments and tumor recurrence, has been attributed to glioma stemlike/progenitor cells. The transcription factor EGR1 (early growth res…	Journal Article	eng	PMC4865916	10.1074/jbc.M116.720698	Autocrine Communication;Brain Neoplasms;Cell Proliferation;Early Growth Response Protein 1;Female;Gene Expression Regulation, Neoplastic;Glioblastoma;Humans;Male;Neoplasm Proteins;Neoplastic Stem Cells;Platelet-Derived Growth Factor;Tumor Cells, Cultured	-1.14899	12.4836	0.711543	Glioma tumorigenesis	79
26663173	2015	Tumour biology : the journal of the International Society for Oncodevelopmental Biology and Medicine	Xing, Wenli;Zeng, Chun	An integrated transcriptomic and computational analysis for biomarker identification in human glioma.	Malignant glioma is one of the most common primary brain tumors and is among the deadliest of human cancers. The molecular mechanism for human glioma is poorly understood. Early prognosis of this disease and early treatment are vital. Thus, it is crucial to target the key genes controlling pathogenesis in the early stage of glioma. In this study, differentially expressed genes in human glioma and…	Journal Article	eng		10.1007/s13277-015-4585-6	Adult;Aged;Biomarkers, Tumor;Brain;Brain Neoplasms;Case-Control Studies;Computational Biology;Female;Gene Expression Profiling;Gene Expression Regulation, Neoplastic;Gene Ontology;Gene Regulatory Networks;Glioma;Humans;Immunoenzyme Techniques;Male;Middle Aged;Neoplasm Grading;Neoplasm Staging;Oligonucleotide Array Sequence Analysis;Prognosis;RNA, Messenger;Real-Time Polymerase Chain Reaction;Reve…	0.974529	9.21775	4.26394	Glioma tumorigenesis	79
26575197	2015	PloS one	Zhang, Wenlong;Liu, Yanwei;Hu, Huimin;Huang, Hua;Bao, Zhaoshi;Yang, Pei;Wang, Yinyan;You, Gan;Yan, Wei;Jiang, Tao;Wang, Jiangfei;Zhang, Wei	ALDH1A3: A Marker of Mesenchymal Phenotype in Gliomas Associated with Cell Invasion.	Aldehyde dehydrogenases (ALDH) is a family of enzymes including 19 members. For now, ALDH activity had been wildly used as a marker of cancer stem cells (CSCs). But biological functions of relevant isoforms and their clinical applications are still controversial. Here, we investigate the clinical significance and potential function of ALDH1A3 in gliomas. By whole-genome transcriptome microarray a…	Journal Article	eng	PMC4648511	10.1371/journal.pone.0142856	Adult;Aldehyde Oxidoreductases;Biomarkers, Tumor;Brain Neoplasms;Cell Adhesion;Cell Line, Tumor;Cell Movement;Female;Gene Expression Regulation, Neoplastic;Genome, Human;Glioma;Humans;Male;Middle Aged;Neoplasm Grading;Neoplastic Stem Cells;Oligonucleotide Array Sequence Analysis;Phenotype;RNA Interference;RNA Splicing;RNA, Messenger;RNA, Small Interfering;Sequence Analysis, DNA	2.21763	9.65879	1.47713	Glioma tumorigenesis	79
26502731	2015	Journal of experimental &amp; clinical cancer research : CR	Wang, Zhi-Liang;Zhang, Chuan-Bao;Cai, Jin-Quan;Li, Qing-Bin;Wang, Zheng;Jiang, Tao	Integrated analysis of genome-wide DNA methylation, gene expression and protein expression profiles in molecular subtypes of WHO II-IV gliomas.	BACKGROUND: Glioma is the most common malignant primary brain tumor among adults, among which glioblastoma (GBM) exhibits the highest malignancy. Despite current standard chemoradiation, glioma is still invariably fatal. A further insight into the molecular background of glioma is required to improve patient outcomes.METHOD: Previous studies evaluated molecular genetic differences through compari…	Journal Article	eng	PMC4620600	10.1186/s13046-015-0249-z	Biomarkers, Tumor;Brain Neoplasms;Cluster Analysis;Computational Biology;DNA Methylation;Disease Progression;Female;Gene Expression Profiling;Gene Expression Regulation, Neoplastic;Glioma;Humans;Kaplan-Meier Estimate;Male;Molecular Sequence Annotation;Prognosis;Proteome;Proteomics;Reproducibility of Results;Transcriptome	1.92304	10.7674	4.40021	Glioma tumorigenesis	79
26468983	2015	Oncotarget	Liu, Yanwei;Hu, Huimin;Zhang, Chuanbao;Wang, Haoyuan;Zhang, Wenlong;Wang, Zheng;Li, Mingyang;Zhang, Wei;Zhou, Dabiao;Jiang, Tao	Co-expression of mitosis-regulating genes contributes to malignant progression and prognosis in oligodendrogliomas.	The clinical prognosis of patients with glioma is determined by tumor grades, but tumors of different subtypes with equal malignancy grade usually have different prognosis that is largely determined by genetic abnormalities. Oligodendrogliomas (ODs) are the second most common type of gliomas. In this study, integrative analyses found that distribution of TCGA transcriptomic subtypes was associate…	Journal Article	eng	PMC4741997	10.18632/oncotarget.5499	Aurora Kinase A;Biomarkers, Tumor;Brain Neoplasms;Cell Cycle Proteins;Cell Line, Tumor;Cell Proliferation;Computational Biology;Databases, Genetic;Disease Progression;Gene Expression Profiling;Gene Expression Regulation, Neoplastic;Genetic Association Studies;Humans;Immunohistochemistry;Kaplan-Meier Estimate;Ki-67 Antigen;Mitosis;Neoplasm Grading;Oligodendroglioma;Oligonucleotide Array Sequence A…	1.50019	10.0428	5.53314	Glioma tumorigenesis	79
26370624	2015	Scientific reports	Syed, Parvez;Gupta, Shabarni;Choudhary, Saket;Pandala, Narendra Goud;Atak, Apurva;Richharia, Annie;K P, Manubhai;Zhu, Heng;Epari, Sridhar;Noronha, Santosh B;Moiyadi, Aliasgar;Srivastava, Sanjeeva	Autoantibody Profiling of Glioma Serum Samples to Identify Biomarkers Using Human Proteome Arrays.	The heterogeneity and poor prognosis associated with gliomas, makes biomarker identification imperative. Here, we report autoantibody signatures across various grades of glioma serum samples and sub-categories of glioblastoma multiforme using Human Proteome chips containing ~17000 full-length human proteins. The deduced sets of classifier proteins helped to distinguish Grade II, III and IV sample…	Journal Article	eng	PMC4570193	10.1038/srep13895	Autoantibodies;Biomarkers;Glioma;Humans;Neoplasm Grading;Proteome;Proteomics	-0.584313	8.97634	5.54419	Glioma tumorigenesis	79
26367194	2015	International journal of hyperthermia : the official journal of European Society for Hyperthermic Oncology, North American Hyperthermia Group	Cha, Jihye;Jeon, Tae-Won;Lee, Chang Geol;Oh, Sang Taek;Yang, Hee-Beom;Choi, Kyung-Ju;Seo, Daekwan;Yun, Ina;Baik, In Hye;Park, Kyung Ran;Park, Young Nyun;Lee, Yun-Han	Electro-hyperthermia inhibits glioma tumorigenicity through the induction of E2F1-mediated apoptosis.	PURPOSE: Modulated electro-hyperthermia (mEHT), also known as oncothermia, shows remarkable treatment efficacies for various types of tumours, including glioma. The aim of the present study was to investigate the molecular mechanism underlying phenotypic changes in oncothermic cancer cells.MATERIALS AND METHODS: U87-MG and A172 human glioma cells were exposed to mEHT (42 °C/60 min) three times wi…	Journal Article	eng		10.3109/02656736.2015.1069411	Animals;Apoptosis;Brain Neoplasms;E2F1 Transcription Factor;Electric Stimulation Therapy;Flow Cytometry;Glioma;Humans;Hyperthermia, Induced;Mice;Mice, Nude	-1.35423	9.46321	-1.00744	Glioma tumorigenesis	79
26337080	2015	Oncotarget	Tong, Tong;Yang, Zhong;Chen, John W;Zhu, Jianming;Yao, Zhenwei	Dynamic 1H-MRS assessment of brain tumors: a novel approach for differential diagnosis of glioma.	PURPOSE: To determine whether the changes of [Cho/NAA] ratio in patients with glioma, measured by dynamic 1H-MRS can be used to differentiate between high-grade and low-grade gliomas.MATERIALS AND METHODS: This prospective study was approved by the institutional ethics committee. Written informed consent was obtained. Forty-nine patients with biopsy-proven glioma and 20 normal control subjects we…	Journal Article	eng	PMC4741675	10.18632/oncotarget.4899	Aspartic Acid;Biomarkers, Tumor;Brain Neoplasms;Case-Control Studies;Choline;Diagnosis, Differential;Glioma;Humans;Metabolomics;Neoplasm Grading;Predictive Value of Tests;Prospective Studies;Proton Magnetic Resonance Spectroscopy;Time Factors	-1.13456	9.5402	6.74261	Glioma tumorigenesis	79
25845910	2015	Molecular medicine reports	Hu, Guozhang;Wei, Bo;Wang, Lina;Wang, Le;Kong, Daliang;Jin, Ying;Sun, Zhigang	Analysis of gene expression profiles associated with glioma progression.	The present study aimed to investigate changes at the transcript level that are associated with spontaneous astrocytoma progression, and further, to discover novel targets for glioma diagnosis and therapy. GSE4290 microarray data downloaded from Gene Expression Omnibus were used to identify the differentially expressed genes (DGEs) by significant analysis of microarray (SAM). The Short Time Serie…	Journal Article	eng	PMC4464167	10.3892/mmr.2015.3583	Biomarkers, Tumor;Brain Neoplasms;Cluster Analysis;Databases, Genetic;Disease Progression;Glioma;Humans;Oligonucleotide Array Sequence Analysis;Protein Interaction Maps;Receptors, Metabotropic Glutamate;Receptors, N-Methyl-D-Aspartate;Transcriptome	2.40417	8.46072	4.14513	Glioma tumorigenesis	79
25798841	2015	Oncogene	Sleire, L;Skeie, B S;Netland, I A;Førde, H E;Dodoo, E;Selheim, F;Leiss, L;Heggdal, J I;Pedersen, P-H;Wang, J;Enger, P Ø	Drug repurposing: sulfasalazine sensitizes gliomas to gamma knife radiosurgery by blocking cystine uptake through system Xc-, leading to glutathione depletion.	Glioblastomas (GBMs) are aggressive brain tumors that always recur after radiotherapy. Cystine, mainly provided by the system X(c)(-) antiporter, is a requirement for glioma cell synthesis of glutathione (GSH) which has a critical role in scavenging free radicals, for example, after radiotherapy. Thus, we hypothesized that the X(c)(-)-inhibitor sulfasalazine (SAS) could potentiate the efficacy of…	Journal Article	eng		10.1038/onc.2015.60	Amino Acid Transport System y+;Animals;Brain Neoplasms;Cell Line, Tumor;Cystine;DNA;Drug Repositioning;Glioblastoma;Glutathione;Humans;Radiation-Sensitizing Agents;Radiosurgery;Rats;Sulfasalazine;Xenograft Model Antitumor Assays	-1.62714	8.19292	-2.18981	Glioma tumorigenesis	79
25797839	2015	Molecular bioSystems	Leone, Roberta;Giussani, Paola;De Palma, Sara;Fania, Chiara;Capitanio, Daniele;Vasso, Michele;Brioschi, Loredana;Riboni, Laura;Viani, Paola;Gelfi, Cecilia	Proteomic analysis of human glioblastoma cell lines differently resistant to a nitric oxide releasing agent.	Glioblastoma multiforme is the most aggressive astrocytoma characterized by the development of resistant cells to various cytotoxic stimuli. Nitric oxide (NO) is able to overcome tumor resistance in PTEN mutated rat C6 glioma cells due to its ability to inhibit cell growth by influencing the intracellular distribution of ceramide. The aim of this study is to monitor the effects of NO donor PAPANO…	Journal Article	eng		10.1039/c4mb00725e	Brain Neoplasms;Cell Line, Tumor;Cell Proliferation;Dose-Response Relationship, Drug;Drug Resistance, Neoplasm;Glioblastoma;Humans;Hydrazines;Nitric Oxide;Nitric Oxide Donors;Proteome;Proteomics	-0.495207	5.73241	-1.09029	Glioma tumorigenesis	79
25365520	2014	PloS one	Azevedo, Hátylas;Fujita, André;Bando, Silvia Yumi;Iamashita, Priscila;Moreira-Filho, Carlos Alberto	Transcriptional network analysis reveals that AT1 and AT2 angiotensin II receptors are both involved in the regulation of genes essential for glioma progression.	Gliomas are aggressive primary brain tumors with high infiltrative potential. The expression of Angiotensin II (Ang II) receptors has been associated with poor prognosis in human astrocytomas, the most common type of glioma. In this study, we investigated the role of Angiotensin II in glioma malignancy through transcriptional profiling and network analysis of cultured C6 rat glioma cells exposed …	Journal Article	eng	PMC4217762	10.1371/journal.pone.0110934	Animals;Cell Line, Tumor;Computational Biology;Disease Progression;Gene Expression Profiling;Gene Expression Regulation, Neoplastic;Gene Regulatory Networks;Genes, Essential;Glioma;Rats;Receptor, Angiotensin, Type 1;Receptor, Angiotensin, Type 2;Reproducibility of Results;Transcription Factors;Transcriptome	2.32099	8.7224	3.33749	Glioma tumorigenesis	79
25050814	2014	PloS one	Simeone, Pasquale;Trerotola, Marco;Urbanella, Andrea;Lattanzio, Rossano;Ciavardelli, Domenico;Di Giuseppe, Fabrizio;Eleuterio, Enrica;Sulpizio, Marilisa;Eusebi, Vincenzo;Pession, Annalisa;Piantelli, Mauro;Alberti, Saverio	A unique four-hub protein cluster associates to glioblastoma progression.	Gliomas are the most frequent brain tumors. Among them, glioblastomas are malignant and largely resistant to available treatments. Histopathology is the gold standard for classification and grading of brain tumors. However, brain tumor heterogeneity is remarkable and histopathology procedures for glioma classification remain unsatisfactory for predicting disease course as well as response to trea…	Journal Article	eng	PMC4106866	10.1371/journal.pone.0103030	Biomarkers, Tumor;Brain;Brain Neoplasms;Cluster Analysis;Electrophoresis, Gel, Two-Dimensional;Glioma;Humans;Immunohistochemistry;Mass Spectrometry;Multivariate Analysis;Protein Interaction Maps;Proteome;Proteomics;Signal Transduction	-0.822711	6.99562	4.35349	Glioma tumorigenesis	79
24962328	2014	Oncotarget	Martino-Echarri, Estefanía;Fernández-Rodríguez, Rubén;Bech-Serra, Joan Josep;Plaza-Calonge, María del Carmen;Vidal, Noemi;Casal, Carmen;Colomé, Nuria;Seoane, Joan;Canals, Francesc;Rodríguez-Manzaneque, Juan Carlos	Relevance of IGFBP2 proteolysis in glioma and contribution of the extracellular protease ADAMTS1.	Expression of IGFBP2 (Insulin-like Growth Factor Binding Protein 2) has been positively correlated with glioma progression. Although the proteolysis of IGFBP2 has been widely recognized, with consequences as a major modulator of IGFII signaling, the relevance of this post-translational modification has not been well studied in tumors. Using an in vivo proteomic approach by Isotope-Coded Protein L…	Journal Article	eng	PMC4147324	10.18632/oncotarget.2009	ADAM Proteins;ADAMTS1 Protein;Brain Neoplasms;Cell Line, Tumor;Disease Progression;Gene Expression Regulation, Neoplastic;Glioma;HEK293 Cells;Humans;Insulin-Like Growth Factor Binding Protein 2;Phosphorylation;Proteolysis;Signal Transduction;Transfection	-0.723643	9.8501	1.34748	Glioma tumorigenesis	79
24858041	2014	Oncogene	Appolloni, I;Barilari, M;Caviglia, S;Gambini, E;Reisoli, E;Malatesta, P	A cadherin switch underlies malignancy in high-grade gliomas.	Although the infiltrative behavior of malignant gliomas is one of their most critical aspects, the mechanisms underlying it have not yet been elucidated. To migrate in the brain parenchyma, malignant glioma cells need to bypass the cell-cell contact inhibitory signals. Here we propose that the blinding of cell-cell contact sensing in gliomas is caused by an unusual mechanism of cadherin switch, i…	Journal Article	eng		10.1038/onc.2014.122	Animals;Brain Neoplasms;Cadherins;Cell Communication;Cell Line, Tumor;Cell Movement;Cell Proliferation;Cyclin-Dependent Kinase Inhibitor p27;Extracellular Signal-Regulated MAP Kinases;Glioma;Humans;Intercellular Junctions;Mice;Proto-Oncogene Proteins c-sis;Transcriptome	-0.656517	10.1065	-0.0875337	Glioma tumorigenesis	79
24696719	2014	International journal of clinical and experimental pathology	Huang, Chunhai;Yuan, Xianrui;Wan, Yi;Liu, Fei;Chen, Xiaoyu;Zhan, Xianquan;Li, Xuejun	VE-statin/Egfl7 expression in malignant glioma and its relevant molecular network.	This study investigated VE-statin/Egfl7 expression and its role and regulatory mechanism in malignant glioma progression. Forty-five paraffin-embedded glioma (grade I-II: n=24; grade III-IV: n=21) were examined. VE-statin/Egfl7 protein expression was detected via immunohistochemistry, and its correlation with pathological grade was evaluated. Three-dimensional cell culture was then performed to i…	Journal Article	eng	PMC3971305		Adult;Brain Neoplasms;Endothelial Cells;Endothelial Growth Factors;Female;Glioma;Humans;Immunohistochemistry;Male;Middle Aged;Neovascularization, Pathologic;Oligonucleotide Array Sequence Analysis;Real-Time Polymerase Chain Reaction;Reverse Transcriptase Polymerase Chain Reaction;Signal Transduction	0.594997	10.7676	2.76036	Glioma tumorigenesis	79
24565222	2014	BMC systems biology	Hu, Yangfan;Li, Jinquan;Yan, Wenying;Chen, Jiajia;Li, Yin;Hu, Guang;Shen, Bairong	Identifying novel glioma associated pathways based on systems biology level meta-analysis.	BACKGROUND: With recent advances in microarray technology, including genomics, proteomics, and metabolomics, it brings a great challenge for integrating this &quot;-omics&quot; data to analysis complex disease. Glioma is an extremely aggressive and lethal form of brain tumor, and thus the study of the molecule mechanism underlying glioma remains very important. To date, most studies focus on dete…	Meta-Analysis	eng	PMC3866263	10.1186/1752-0509-7-S2-S9	Databases, Genetic;Epithelial-Mesenchymal Transition;Gene Ontology;Glioma;Humans;Oligonucleotide Array Sequence Analysis;Systems Biology;Transcriptome;Transforming Growth Factor beta	2.98291	7.6987	3.55279	Glioma tumorigenesis	79
24550449	2014	Proceedings of the National Academy of Sciences of the United States of America	Sun, Yingyu;Zhang, Wei;Chen, Dongfeng;Lv, Yuhong;Zheng, Junxiong;Lilljebjörn, Henrik;Ran, Liang;Bao, Zhaoshi;Soneson, Charlotte;Sjögren, Hans Olov;Salford, Leif G;Ji, Jianguang;French, Pim J;Fioretos, Thoas;Jiang, Tao;Fan, Xiaolong	A glioma classification scheme based on coexpression modules of EGFR and PDGFRA.	We hypothesized that key signaling pathways of glioma genesis might enable the molecular classification of gliomas. Gene coexpression modules around epidermal growth factor receptor (EGFR) (EM, 29 genes) or platelet derived growth factor receptor A (PDGFRA) (PM, 40 genes) in gliomas were identified. Based on EM and PM expression signatures, nonnegative matrix factorization reproducibly clustered …	Journal Article	eng	PMC3948229	10.1073/pnas.1313814111	Age Factors;Animals;China;Cluster Analysis;ErbB Receptors;Gene Expression Profiling;Gene Expression Regulation, Neoplastic;Glioma;Humans;Kaplan-Meier Estimate;Mice;Neural Stem Cells;Polymorphism, Single Nucleotide;Prognosis;Receptor, Platelet-Derived Growth Factor alpha;Signal Transduction	1.49153	11.9828	3.50956	Glioma tumorigenesis	79
24204956	2013	PloS one	Brown, Christine E;Warden, Charles D;Starr, Renate;Deng, Xutao;Badie, Behnam;Yuan, Yate-Ching;Forman, Stephen J;Barish, Michael E	Glioma IL13Rα2 is associated with mesenchymal signature gene expression and poor patient prognosis.	A major challenge for successful immunotherapy against glioma is the identification and characterization of validated targets. We have taken a bioinformatics approach towards understanding the biological context of IL-13 receptor α2 (IL13Rα2) expression in brain tumors, and its functional significance for patient survival. Querying multiple gene expression databases, we show that IL13Rα2 expressi…	Journal Article	eng	PMC3800130	10.1371/journal.pone.0077769	Adult;Biomarkers, Tumor;Brain Neoplasms;Female;Flow Cytometry;Follow-Up Studies;Gene Expression Regulation, Neoplastic;Gene Regulatory Networks;Glioma;Humans;Interleukin-13 Receptor alpha2 Subunit;Male;Mesoderm;Middle Aged;Neoplasm Grading;Neoplasm Recurrence, Local;Neoplasm Staging;Prognosis;Prospective Studies;Survival Rate;Transcriptome;Tumor Cells, Cultured;Young Adult	3.01368	11.3665	5.45493	Glioma tumorigenesis	79
23630597	2013	PloS one	Chen, Dongfeng;Persson, Annette;Sun, Yingyu;Salford, Leif G;Nord, David Gisselsson;Englund, Elisabet;Jiang, Tao;Fan, Xiaolong	Better prognosis of patients with glioma expressing FGF2-dependent PDGFRA irrespective of morphological diagnosis.	Signaling of platelet derived growth factor receptor alpha (PDGFRA) is critically involved in the development of gliomas. However, the clinical relevance of PDGFRA expression in glioma subtypes and the mechanisms of PDGFRA expression in gliomas have been controversial. Under the supervision of morphological diagnosis, analysis of the GSE16011 and the Repository of Molecular Brain Neoplasia Data (…	Journal Article	eng	PMC3632602	10.1371/journal.pone.0061556	Adult;Aged;Brain Neoplasms;Case-Control Studies;Cell Line, Tumor;Cell Proliferation;Fibroblast Growth Factor 2;Gene Amplification;Gene Expression Regulation, Neoplastic;Glioma;Humans;In Situ Hybridization, Fluorescence;Kaplan-Meier Estimate;Middle Aged;Oligonucleotide Array Sequence Analysis;Prognosis;Receptor, Platelet-Derived Growth Factor alpha;Signal Transduction;Transcriptome	1.07889	11.4034	3.15849	Glioma tumorigenesis	79
23589055	2013	Tumour biology : the journal of the International Society for Oncodevelopmental Biology and Medicine	Wei, Ping;Zhang, Wei;Yang, Liu-Song;Zhang, Hai-Shi;Xu, Xiao-En;Jiang, Ying-Hua;Huang, Feng-Ping;Shi, Qian	Serum GFAP autoantibody as an ELISA-detectable glioma marker.	Glioma is the most common primary brain tumor, yet the high cost of diagnostic imaging has made early detection of asymptomatic glioma a formidable challenge. Thus, the development of a convenient, sensitive, and cost-effective diagnostic strategy, such as enzyme-linked immunosorbent assay (ELISA) based on glioma-specific and World Health Organization (WHO) grade-specific autoantibody serum marke…	Journal Article	eng		10.1007/s13277-013-0770-7	Autoantibodies;Biomarkers, Tumor;Brain Neoplasms;Enzyme-Linked Immunosorbent Assay;Glial Fibrillary Acidic Protein;Glioma;Humans	-1.24395	9.43543	5.63066	Glioma tumorigenesis	79
23402815	2013	Cancer letters	Ajeawung, Norbert F;Joshi, Harish C;Kamnasaran, Deepak	The microtubule binding drug EM011 inhibits the growth of paediatric low grade gliomas.	Low grade gliomas are a heterogeneous group of tumours representing the most common form of neoplasms in the central nervous system among children. Although gross total resection remains the principal treatment, it is often impractical especially for the resection of tumours within eloquent regions of the brain. Instead Radiotherapy is utilised in such cases, but because of its associated toxicit…	Journal Article	eng		10.1016/j.canlet.2013.02.004	Antineoplastic Agents;Apoptosis;Apoptosis Inducing Factor;Brain Neoplasms;Cell Adhesion;Cell Line, Tumor;Cell Movement;Cell Proliferation;Cell Survival;Child;Dioxoles;Gelatinases;Gene Expression;Glioma;Humans;Isoquinolines;Microtubules;Neoplasm Grading;S Phase Cell Cycle Checkpoints;Transcriptome;Tubulin Modulators	-1.89063	7.96054	-0.853561	Glioma tumorigenesis	79
23061382	2012	Journal of neurosurgery	Lu, Jie;Ksendzovsky, Alexander;Yang, Chunzhang;Mehta, Gautam U;Yong, Raymund L;Weil, Robert J;Park, Deric M;Mushlin, Harry M;Fang, Xueping;Balgley, Brian M;Lee, Dae-Hee;Lee, Cheng S;Lonser, Russell R;Zhuang, Zhengping	CNTF receptor subunit α as a marker for glioma tumor-initiating cells and tumor grade: laboratory investigation.	OBJECT: Tumor-initiating cells are uniquely resilient to current treatment modalities and play an important role in tumor resistance and recurrence. The lack of specific tumor-initiating cell markers to identify and target these cells presents a major obstacle to effective directed therapy.METHODS: To identify tumor-initiating cell markers in primary brain tumors, the authors compared the proteom…	Journal Article	eng	PMC4762039	10.3171/2012.9.JNS1212	Animals;Biomarkers, Tumor;Blotting, Western;Brain Neoplasms;Chromatography, Liquid;Ciliary Neurotrophic Factor Receptor alpha Subunit;Fluorescent Antibody Technique;Gene Expression Regulation, Neoplastic;Glioma;Humans;Mice;Mice, Nude;Mutation;Neoplasm Grading;Neoplastic Stem Cells;Transplantation, Heterologous;Up-Regulation	-0.670975	8.01695	0.048827	Glioma tumorigenesis	79
22943417	2012	Proteome science	Ramão, Anelisa;Gimenez, Marcela;Laure, Helen Julie;Izumi, Clarice;Vida, Rodrigo Cesar Dos Santos;Oba-Shinjo, Sueli;Marie, Suely Kazue Nagahashi;Rosa, Jose Cesar	Changes in the expression of proteins associated with aerobic glycolysis and cell migration are involved in tumorigenic ability of two glioma cell lines.	BACKGROUND: The most frequent and malignant brain cancer is glioblastoma multiforme (GBM). In gliomas, tumor progression and poor prognosis are associated with the tumorigenic ability of the cells. U87MG cells (wild-type p53) are known to be tumorigenic in nude mice, but T98G cells (mutant p53) are not tumorigenic. We investigated the proteomic profiling of these two cell lines in order to gain n…	Journal Article	eng	PMC3547712	10.1186/1477-5956-10-53		0.557034	6.50813	-1.04519	Glioma tumorigenesis	79
22942880	2012	Current neuropharmacology	Suk, Kyoungho	Proteomic analysis of glioma chemoresistance.	Malignant glioma is the most common and destructive form of primary brain tumor. Along with surgery and radiation, chemotherapy remains as the major treatment modality. The emergence of drug resistance, however, often leads to a therapeutic failure in the treatment of glioma, precluding long-term survival of the patients. A proteomic approach has recently been adapted for the mechanistic analysis…	Journal Article	eng	PMC3286849	10.2174/157015912799362733		-3.02922	10.7601	-0.704536	Glioma tumorigenesis	79
[truncated: 930 more rows]
